# Supplementary material for: Combination of gold and iridium catalysts for the synthesis of N-alkylated amides from nitriles and alcohols
Source: Royal Society of Chemistry journal article supplement (doi:10.1039/c4cy01506a), 2015-01-01
Supplement: c4cy01506a1.pdf [file c4cy01506a1.pdf]

Electronic Supplementary Information for

**Combination of gold and iridium catalysts for the synthesis of *N*-alkylated  
amides from nitriles and alcohols**

Feng Li,<sup>\*a</sup> Juan Ma,<sup>a</sup> Lei Lu,<sup>a</sup> Xiaofeng Bao<sup>b</sup> and Wanying Tang<sup>a</sup>

<sup>a</sup> Key Laboratory for Soft Chemistry and Functional Materials, Ministry of Education, Nanjing University of Science and Technology, Nanjing 210094, P. R. China

<sup>b</sup> Department of Biochemical Engineering, Nanjing University of Science and Technology, Nanjing 210094, P. R. China

N-benzylbenzamide  
Proton CDCl<sub>3</sub>

7.797  
7.783  
7.512  
7.499  
7.484  
7.440  
7.425  
7.411  
7.360  
7.352  
7.305  
7.297  
7.258  
6.448

4.654  
4.643

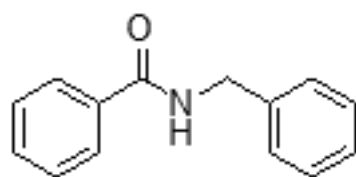

4aa

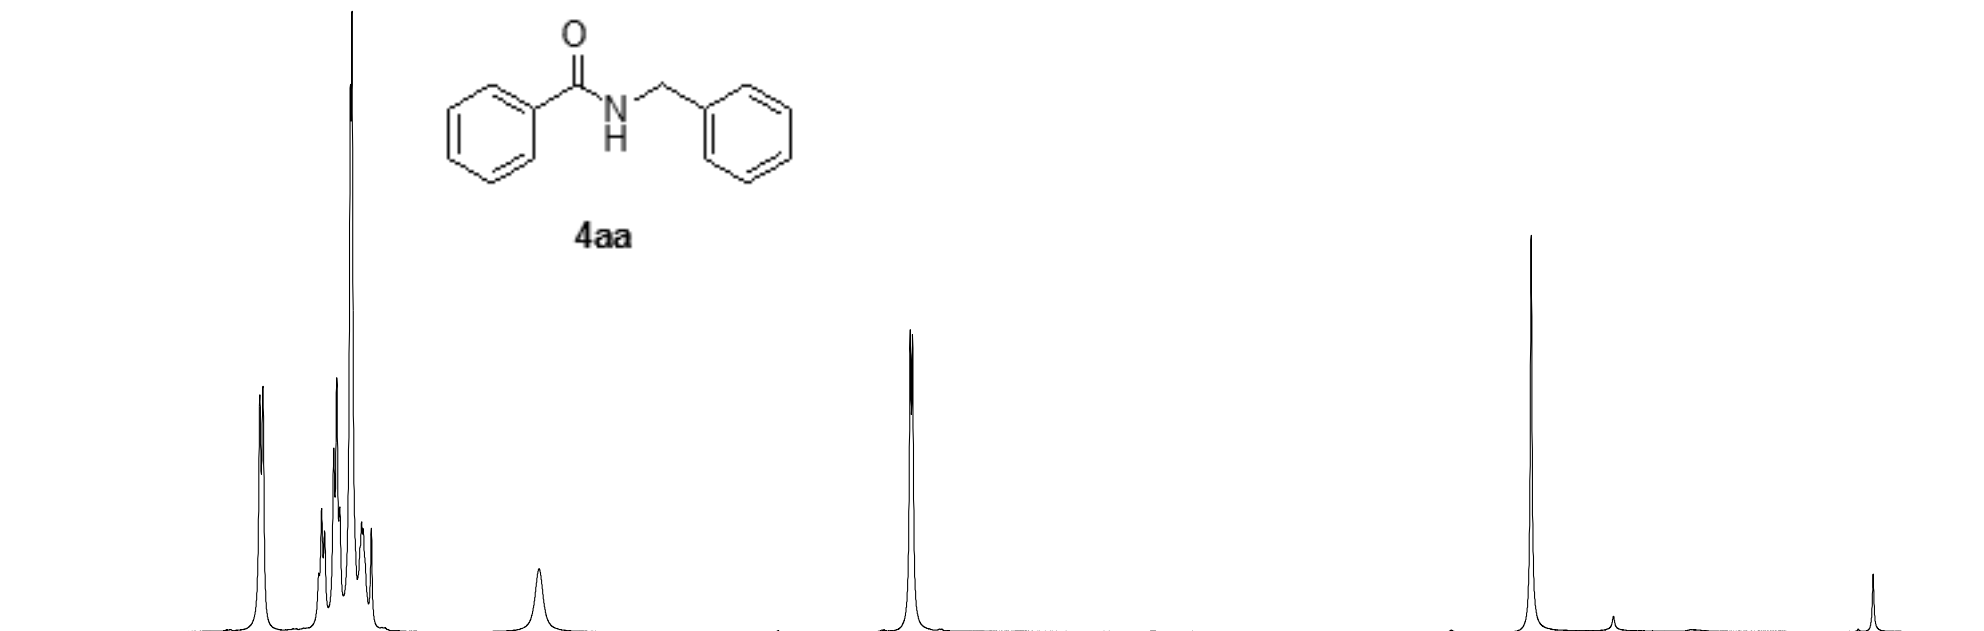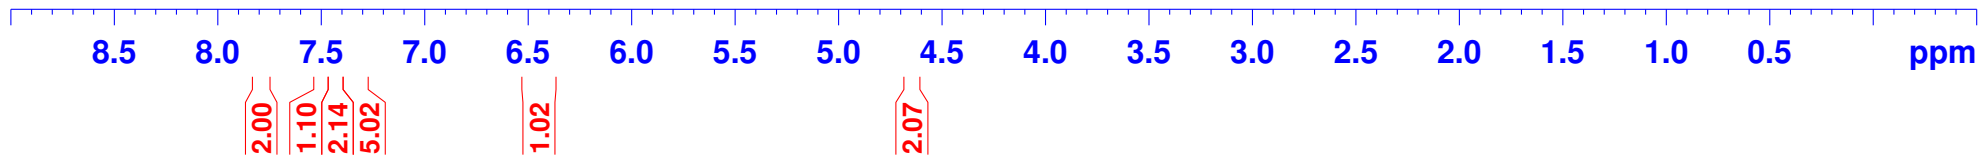

N-benzylbenzamide  
C13CPD CDC13

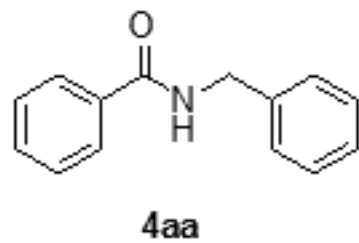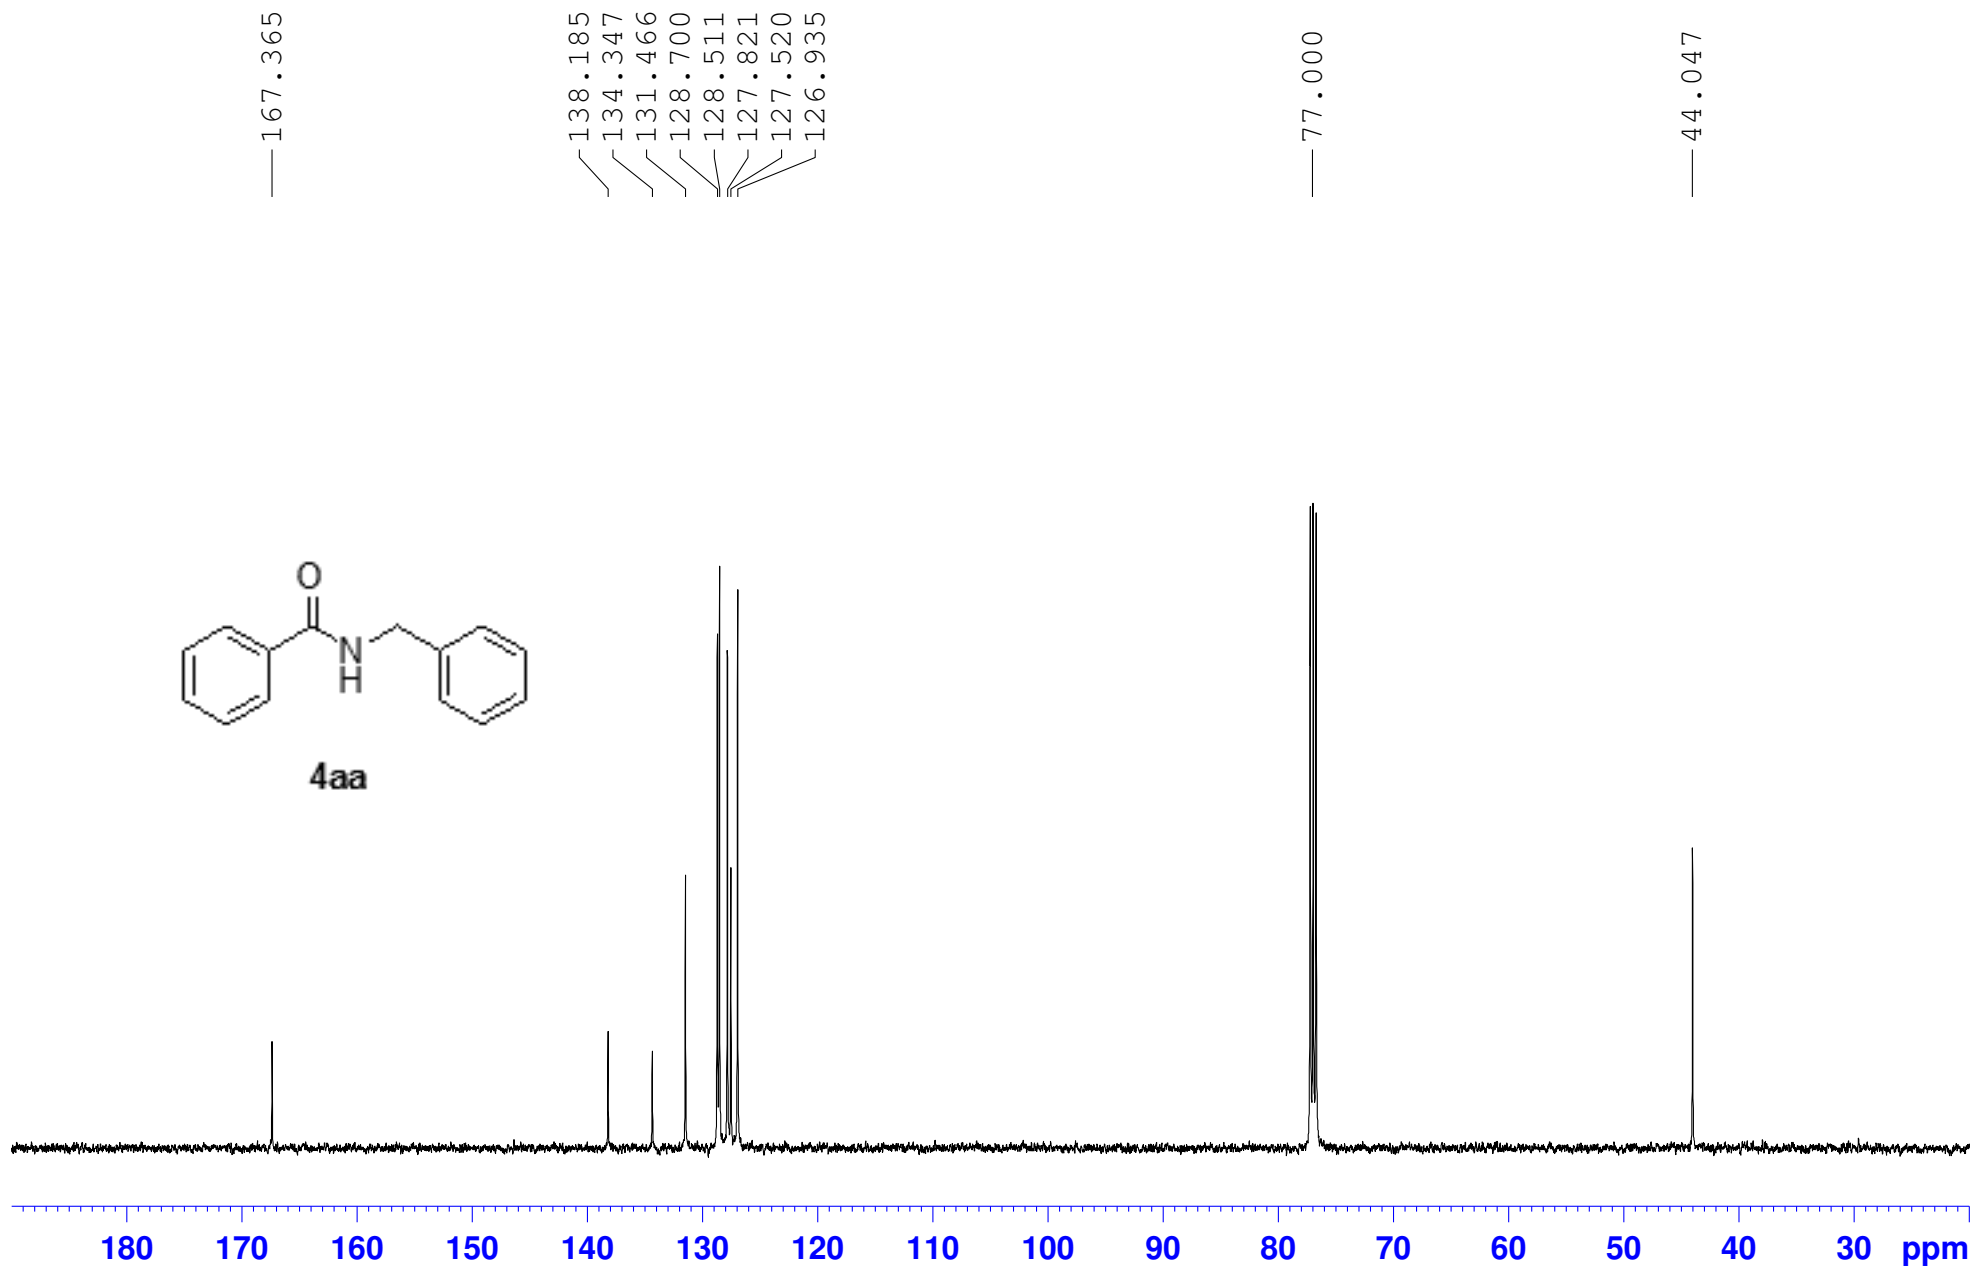

N-(4-fluorobenzyl)benzamide  
Proton CDCl<sub>3</sub>

7.794  
7.779  
7.521  
7.506  
7.492  
7.445  
7.430  
7.415  
7.337  
7.326  
7.321  
7.310  
7.260  
7.047  
7.029  
7.012  
6.457

4.617  
4.606

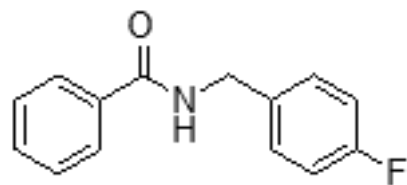

4ab

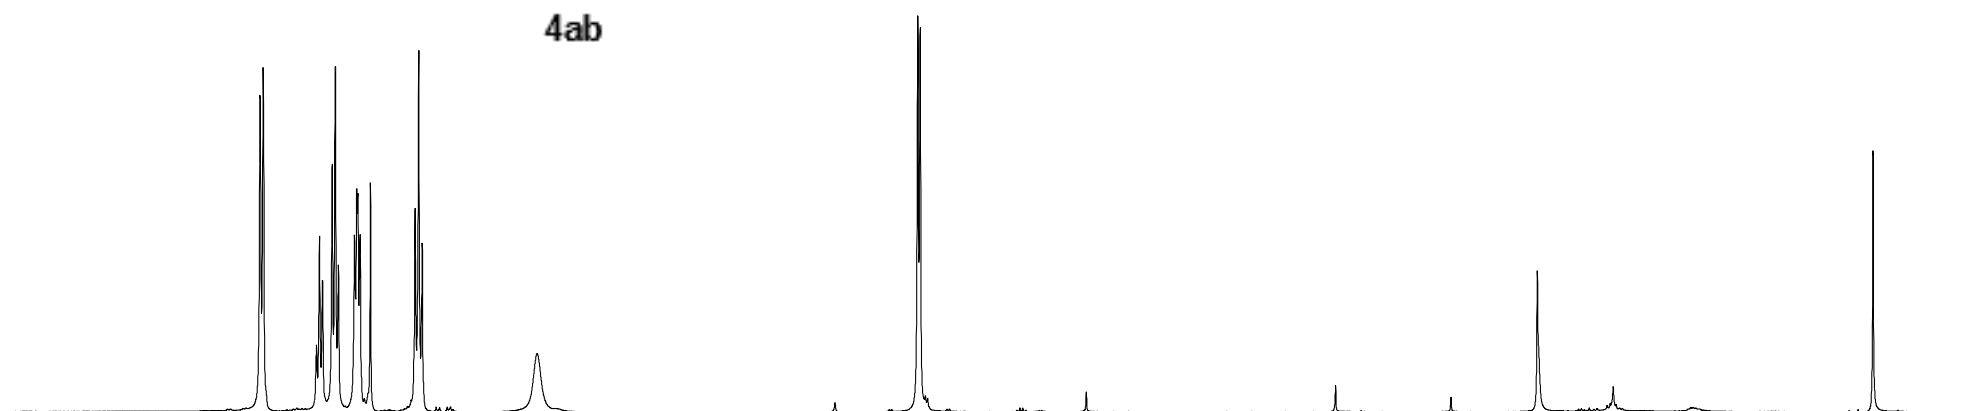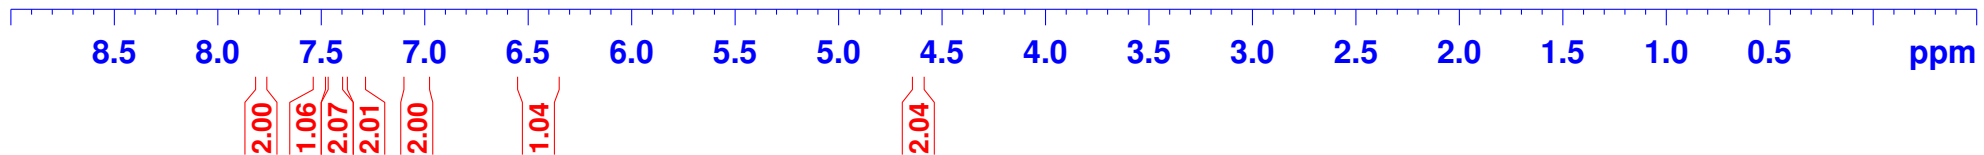

N-(4-fluorobenzyl)benzamide  
C13CPD CDCl3

— 167.368  
— 163.174  
— 161.221

134.230  
134.045  
131.586  
129.537  
129.472  
128.570  
126.938  
115.625  
115.453

— 77.000

— 43.312

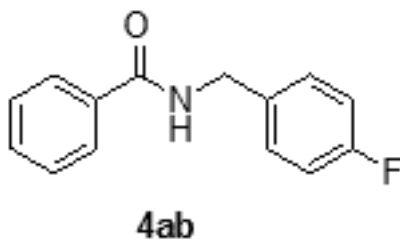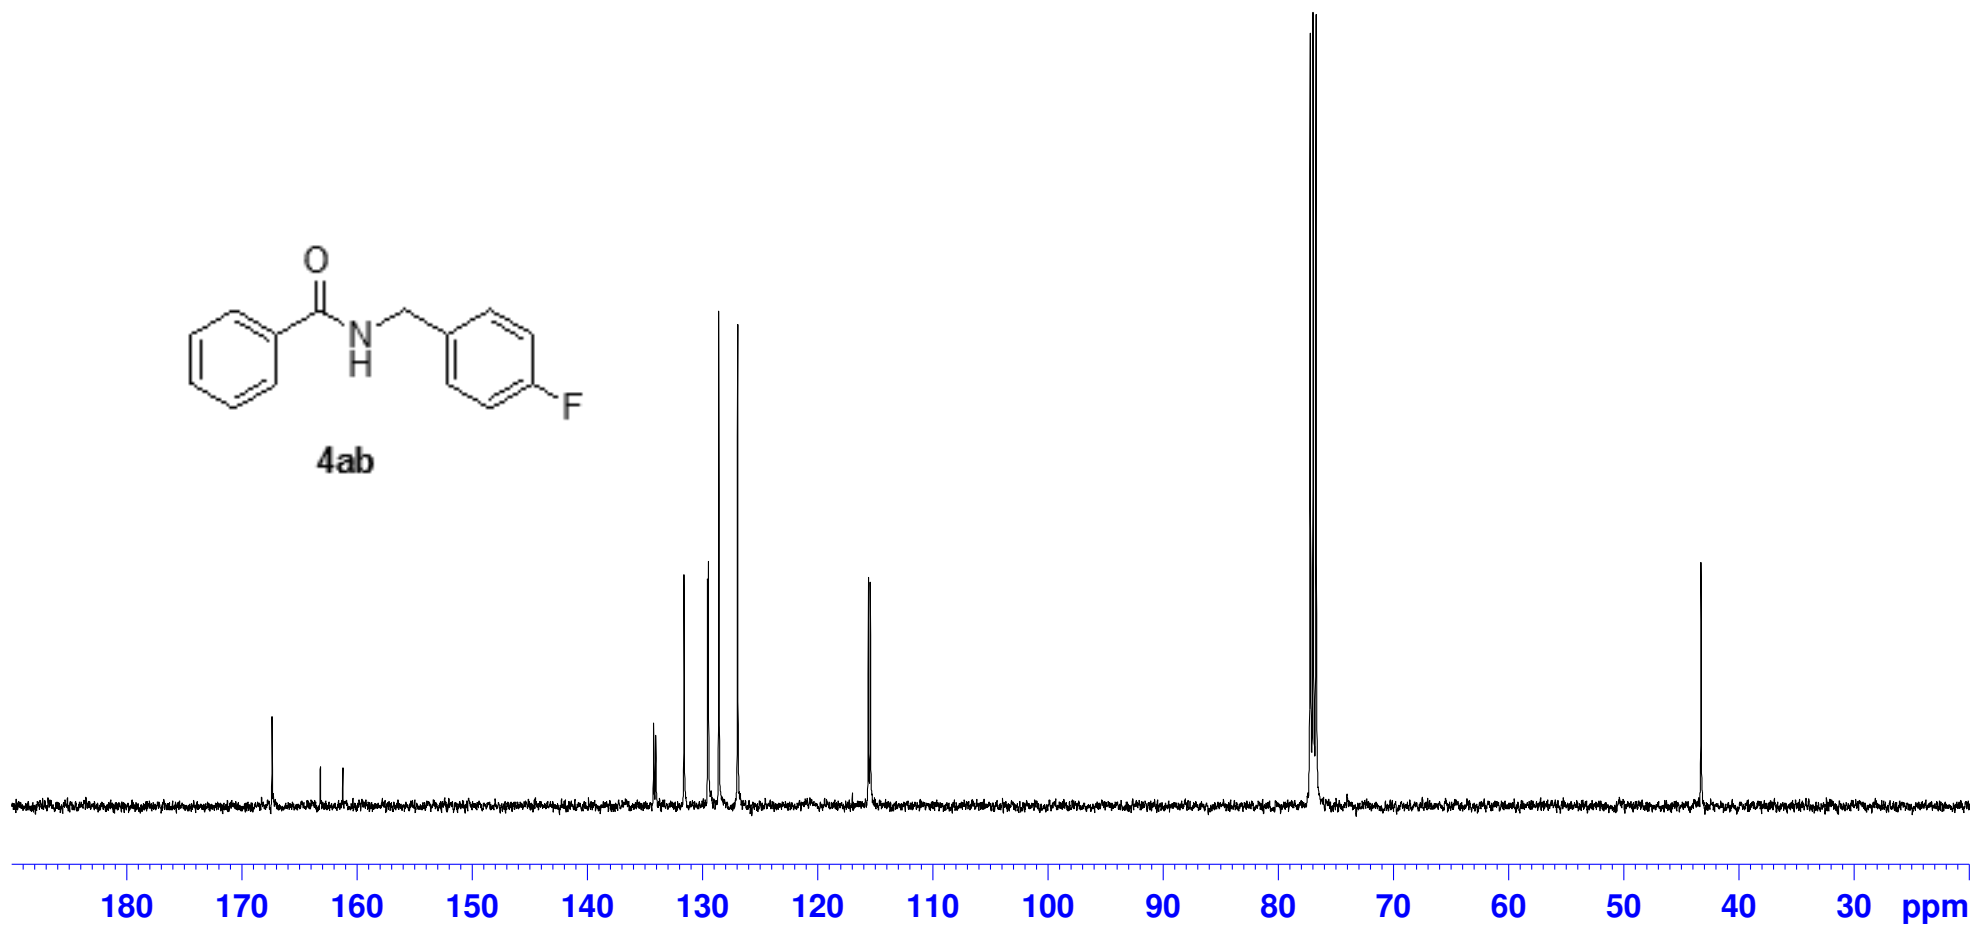

N-(4-chlorobenzyl)benzamide  
Proton CDCl<sub>3</sub>

7.791  
7.776  
7.524  
7.509  
7.495  
7.445  
7.430  
7.415  
7.320  
7.303  
7.288  
7.271  
7.261  
6.514

4.611  
4.599

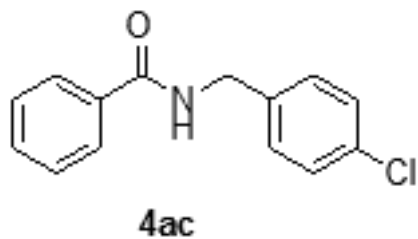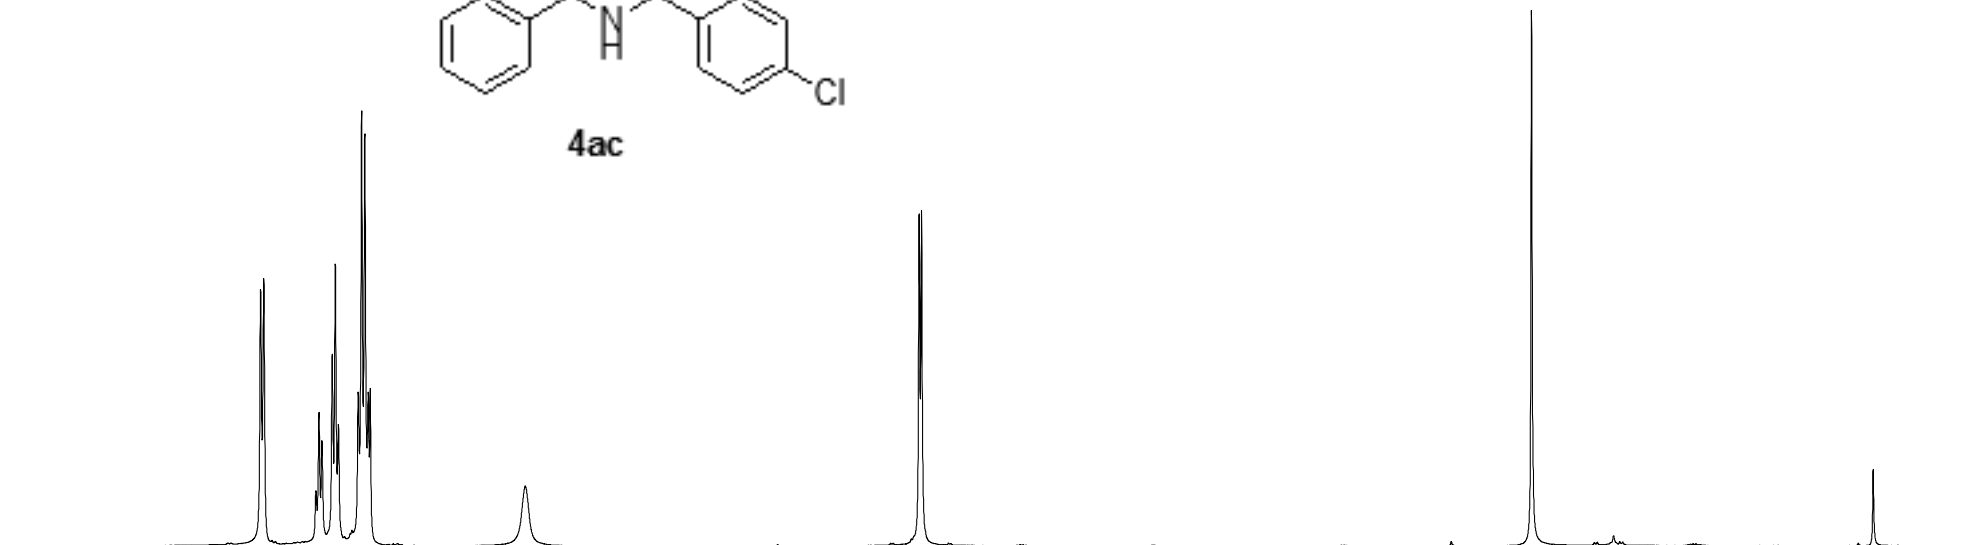

8.5

8.0

7.5

7.0

6.5

6.0

5.5

5.0

4.5

4.0

3.5

3.0

2.5

2.0

1.5

1.0

0.5

ppm

2.00

1.09

2.07

4.01

1.00

2.09

N-(4-chlorobenzyl)benzamide  
C13CPD CDCl3

—167.471

136.808  
134.112  
133.253  
131.607  
129.085  
128.774  
128.548  
126.946

—43.267

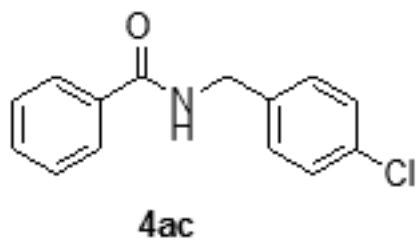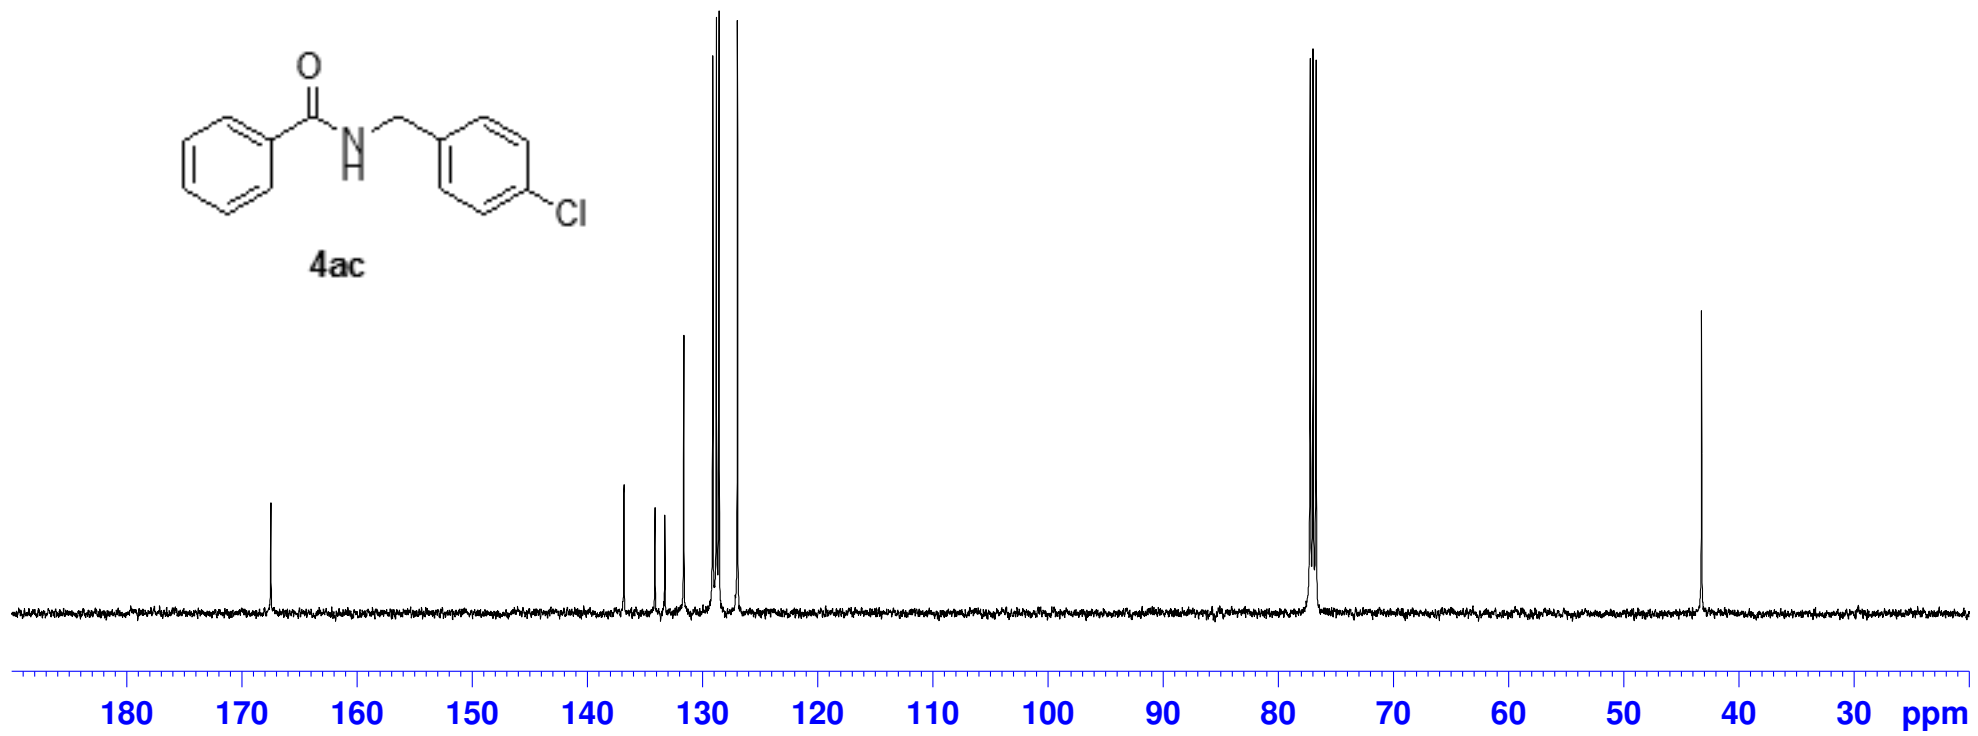

N-(2,4-dichlorobenzyl)benzamide  
Proton CDCl<sub>3</sub>

7.786  
7.770  
7.529  
7.514  
7.500  
7.451  
7.436  
7.420  
7.403  
7.263  
7.237  
7.234  
7.220  
7.218  
6.660

4.689  
4.677

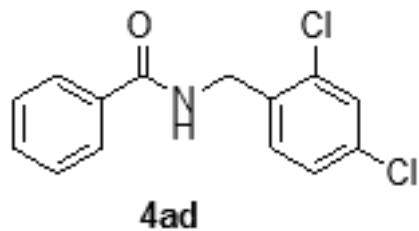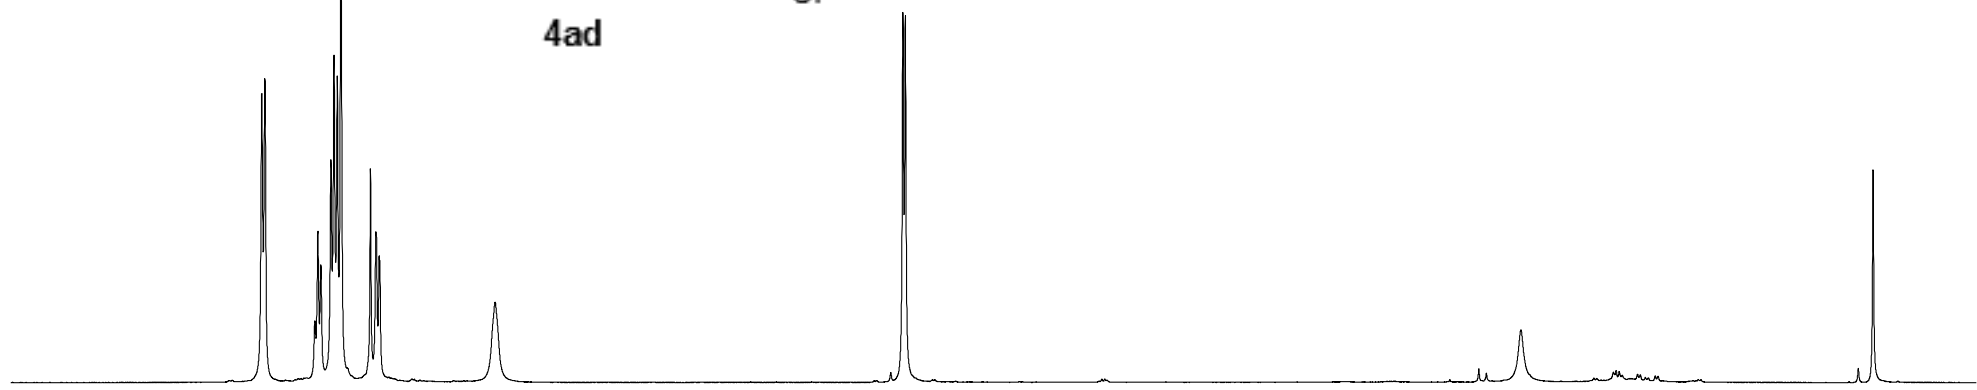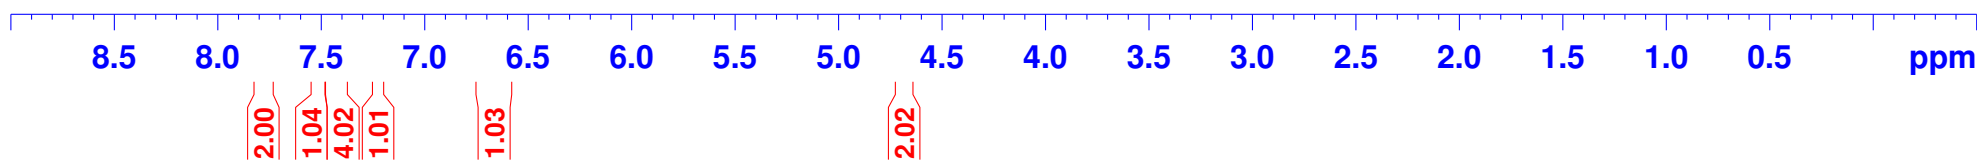



N-(2,4-dichlorobenzyl)benzamide  
C13CPD CDC13

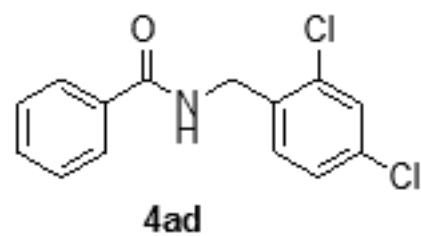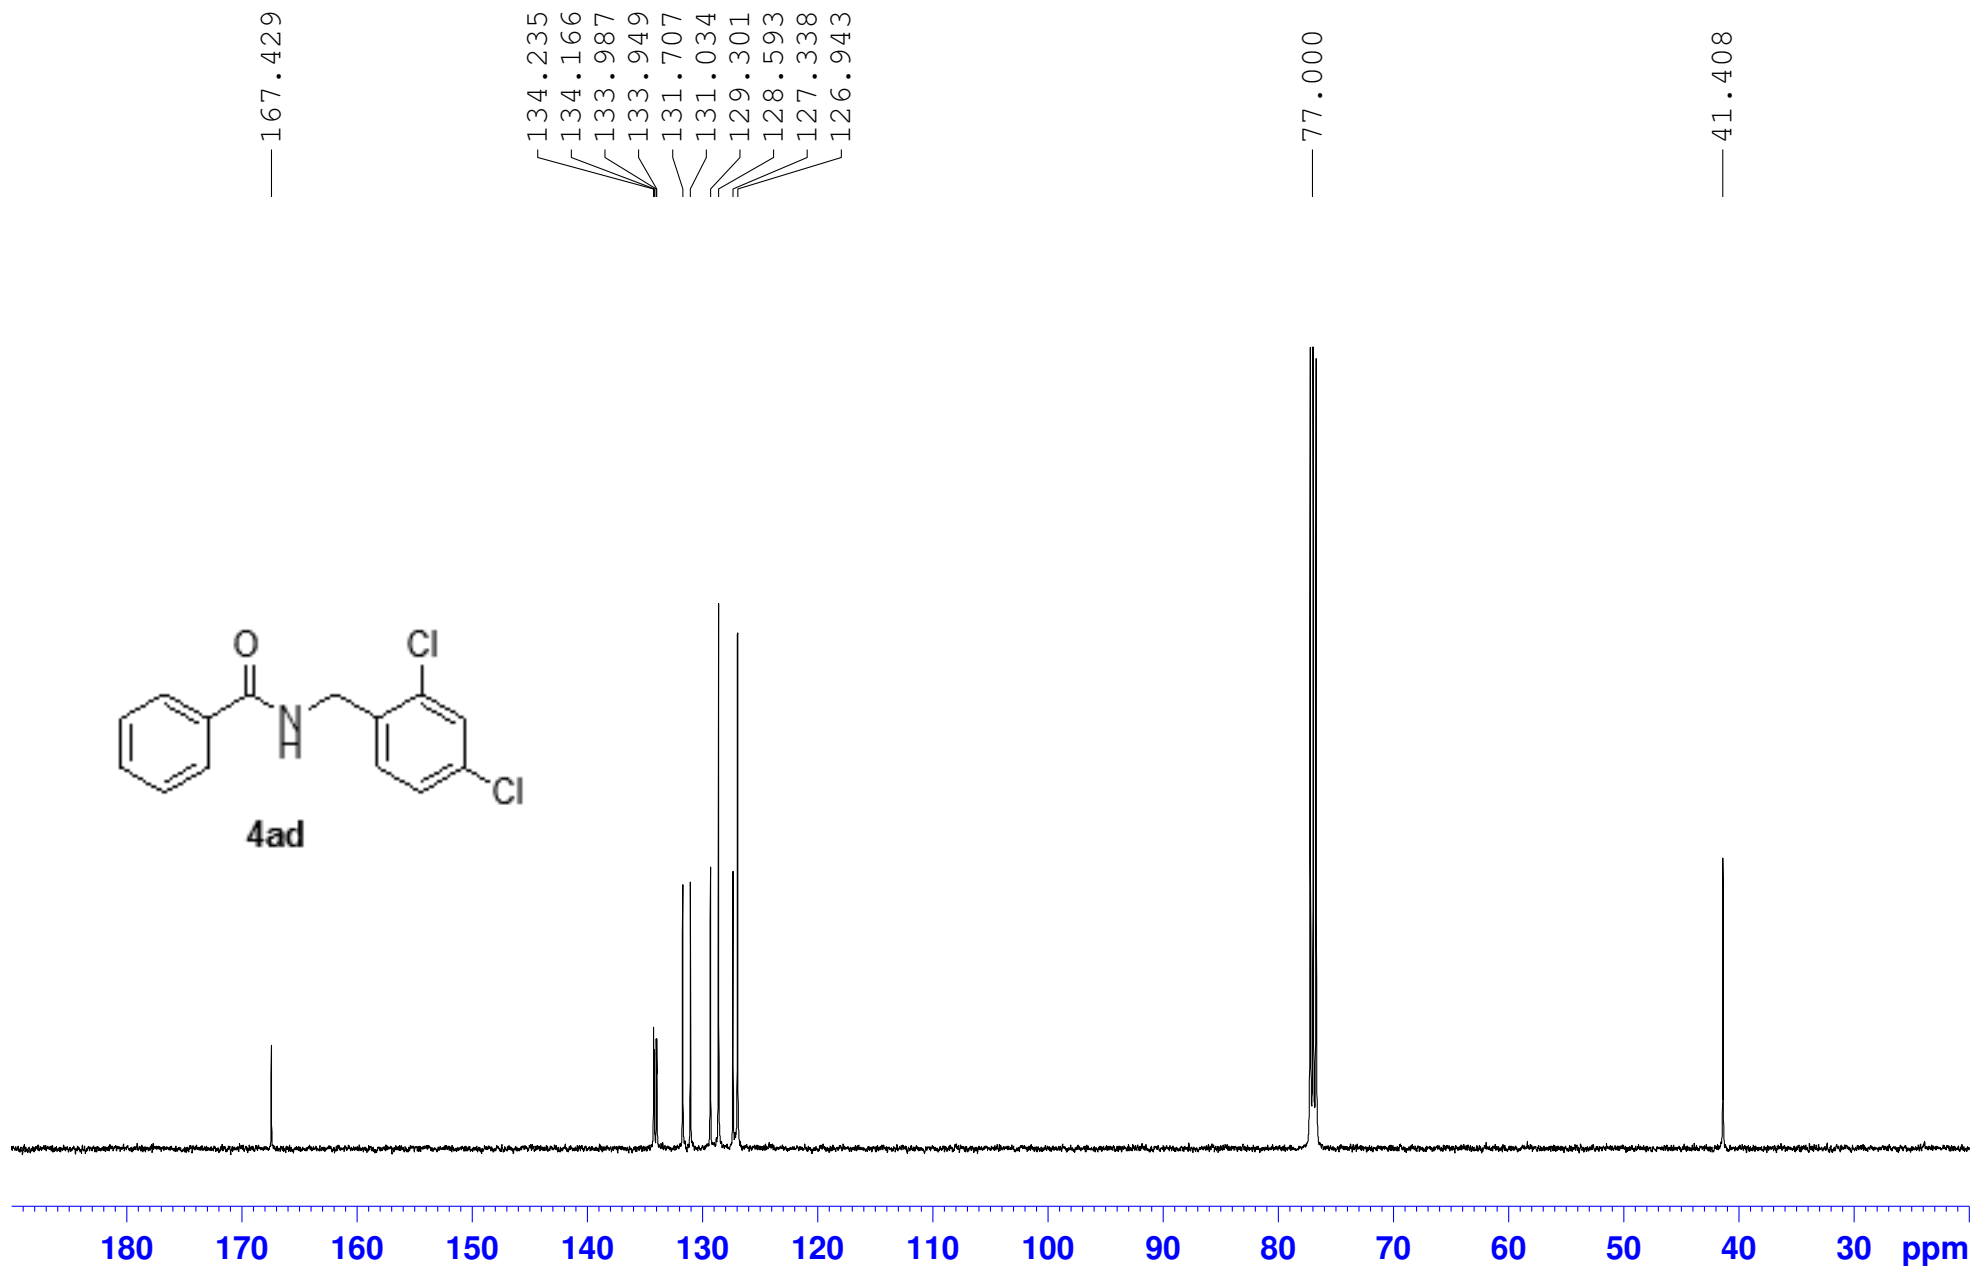

N-(4-bromobenzyl)benzamide  
Proton CDCl<sub>3</sub>

7.791  
7.776  
7.526  
7.511  
7.496  
7.473  
7.457  
7.447  
7.432  
7.417  
7.261  
7.234  
7.218  
6.504

4.598  
4.586

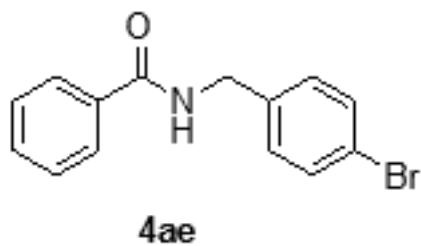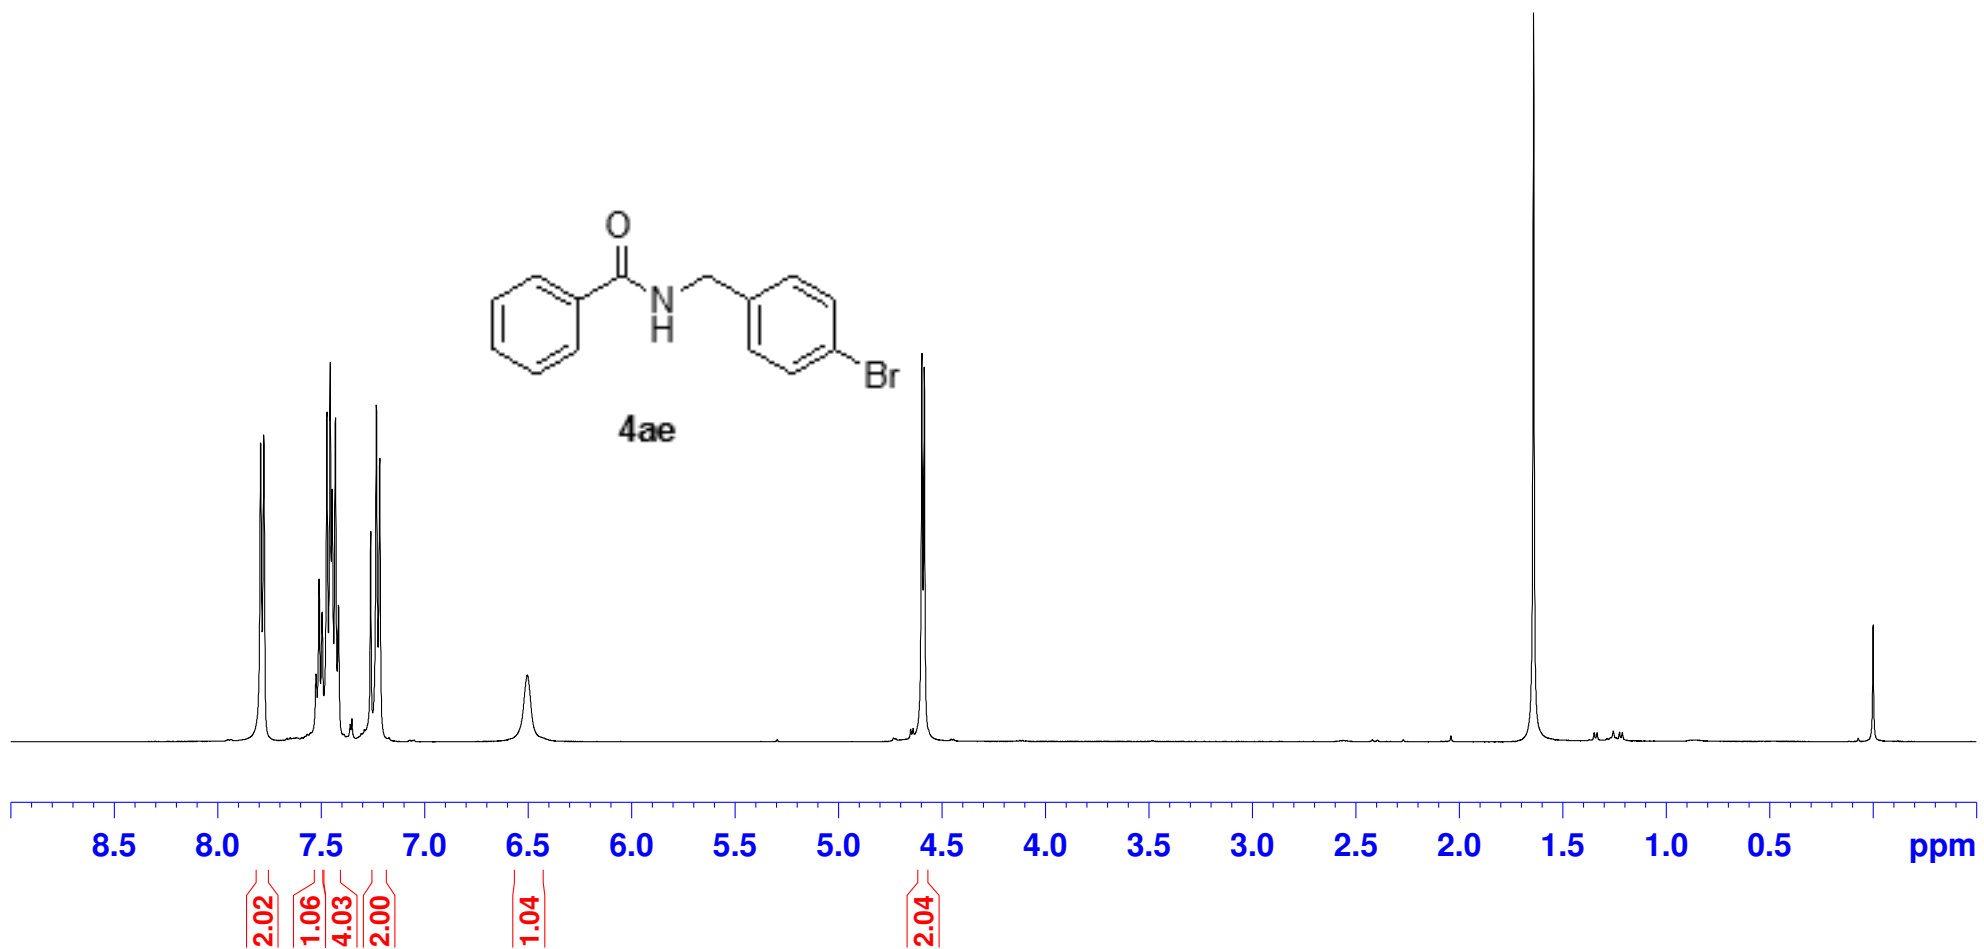

N-(4-bromobenzyl)benzamide  
C13CPD CDCl3

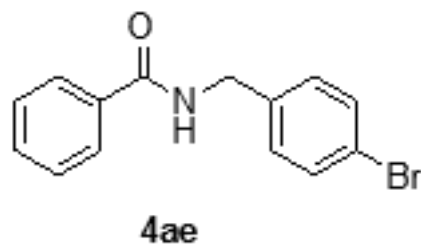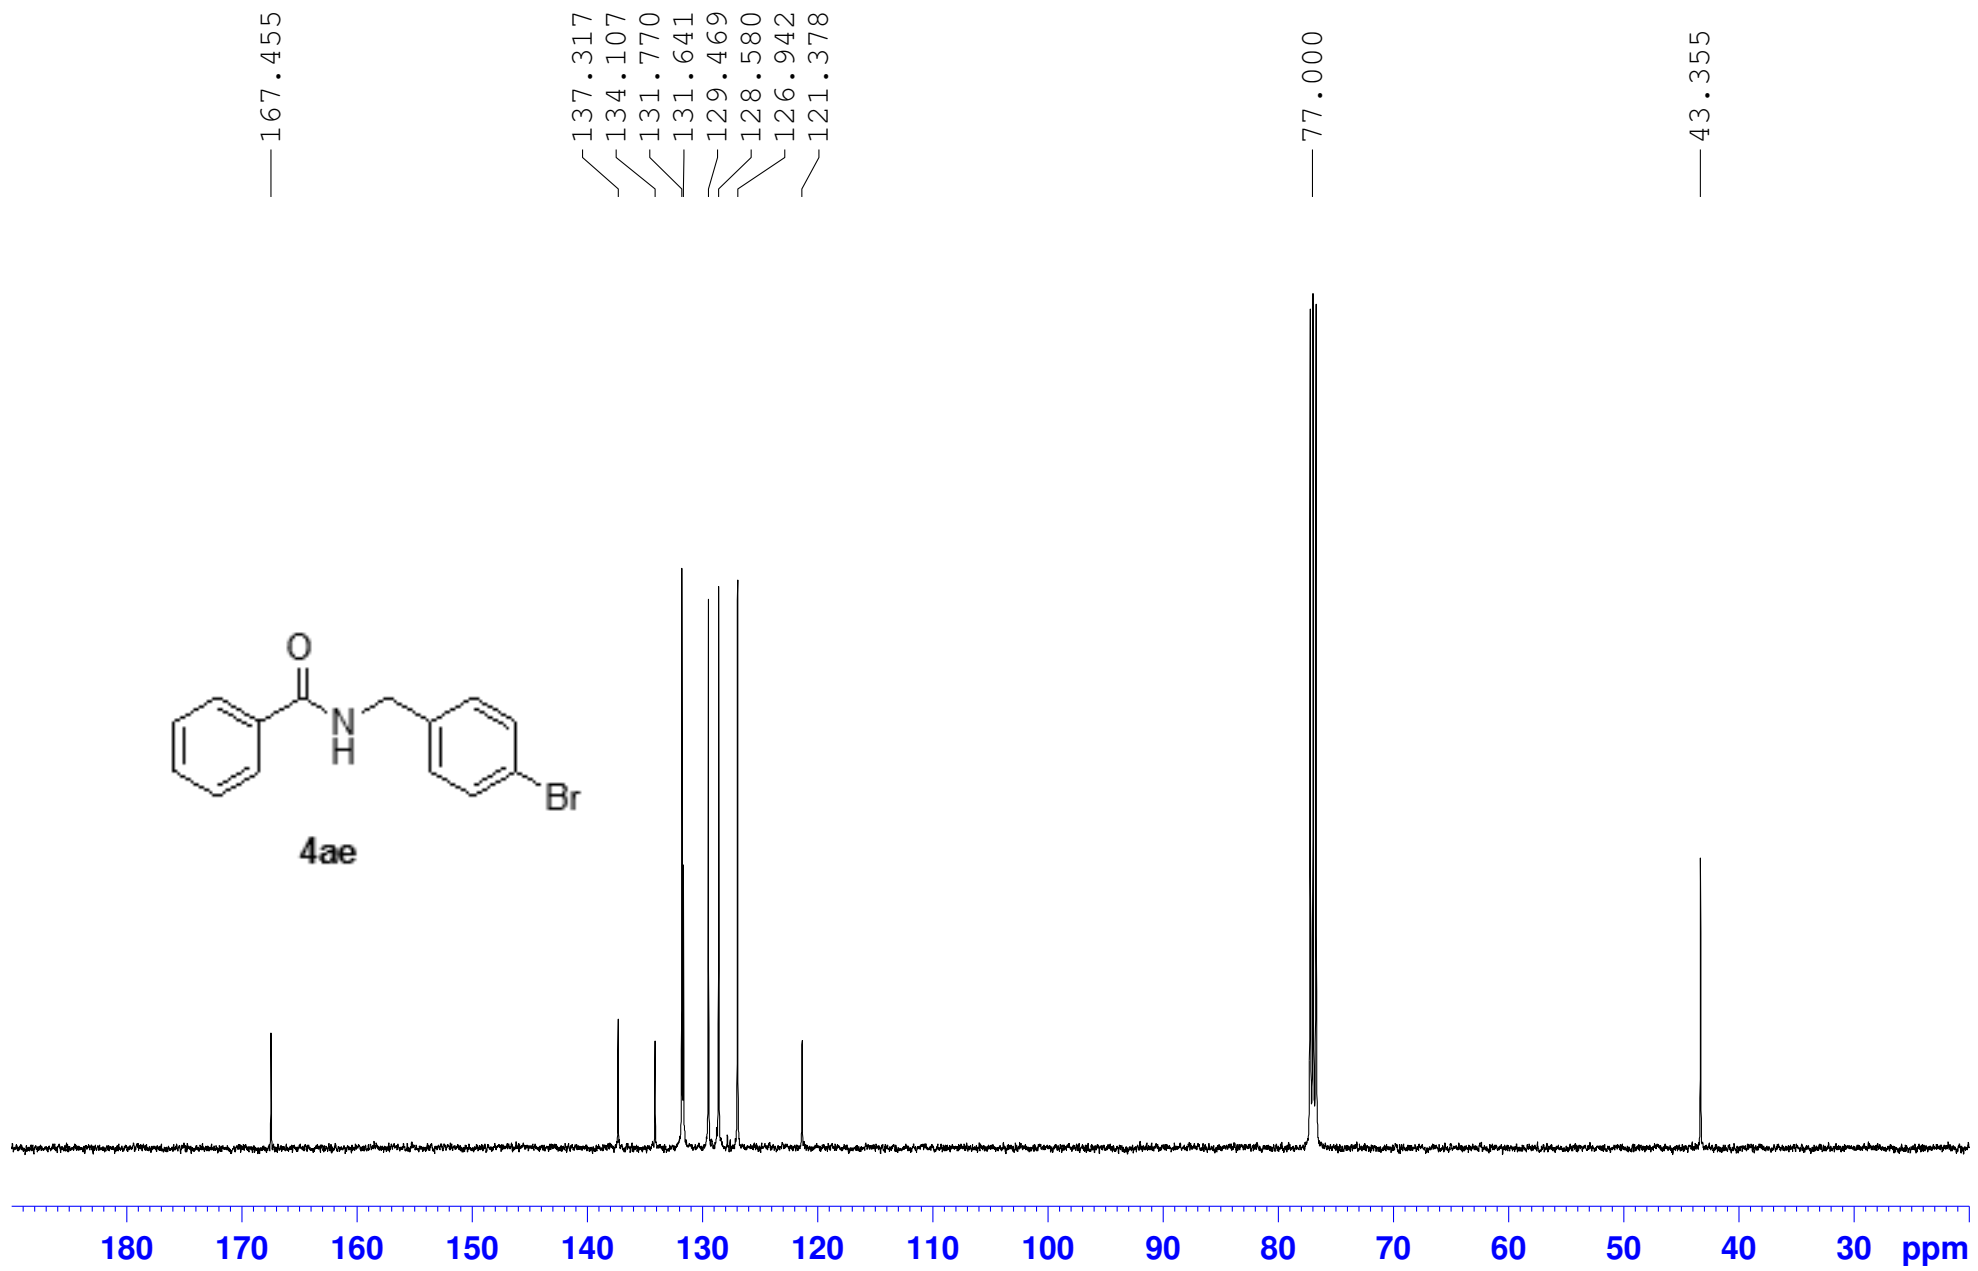

N-(4-(trifluoromethyl)benzyl)benzamide  
Proton CDCl<sub>3</sub>

7.806  
7.793  
7.611  
7.596  
7.582  
7.527  
7.518  
7.507  
7.477  
7.459  
7.447  
7.435  
7.419  
7.261  
6.660  
6.541

4.716  
4.693  
4.683

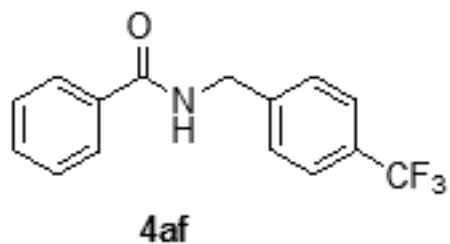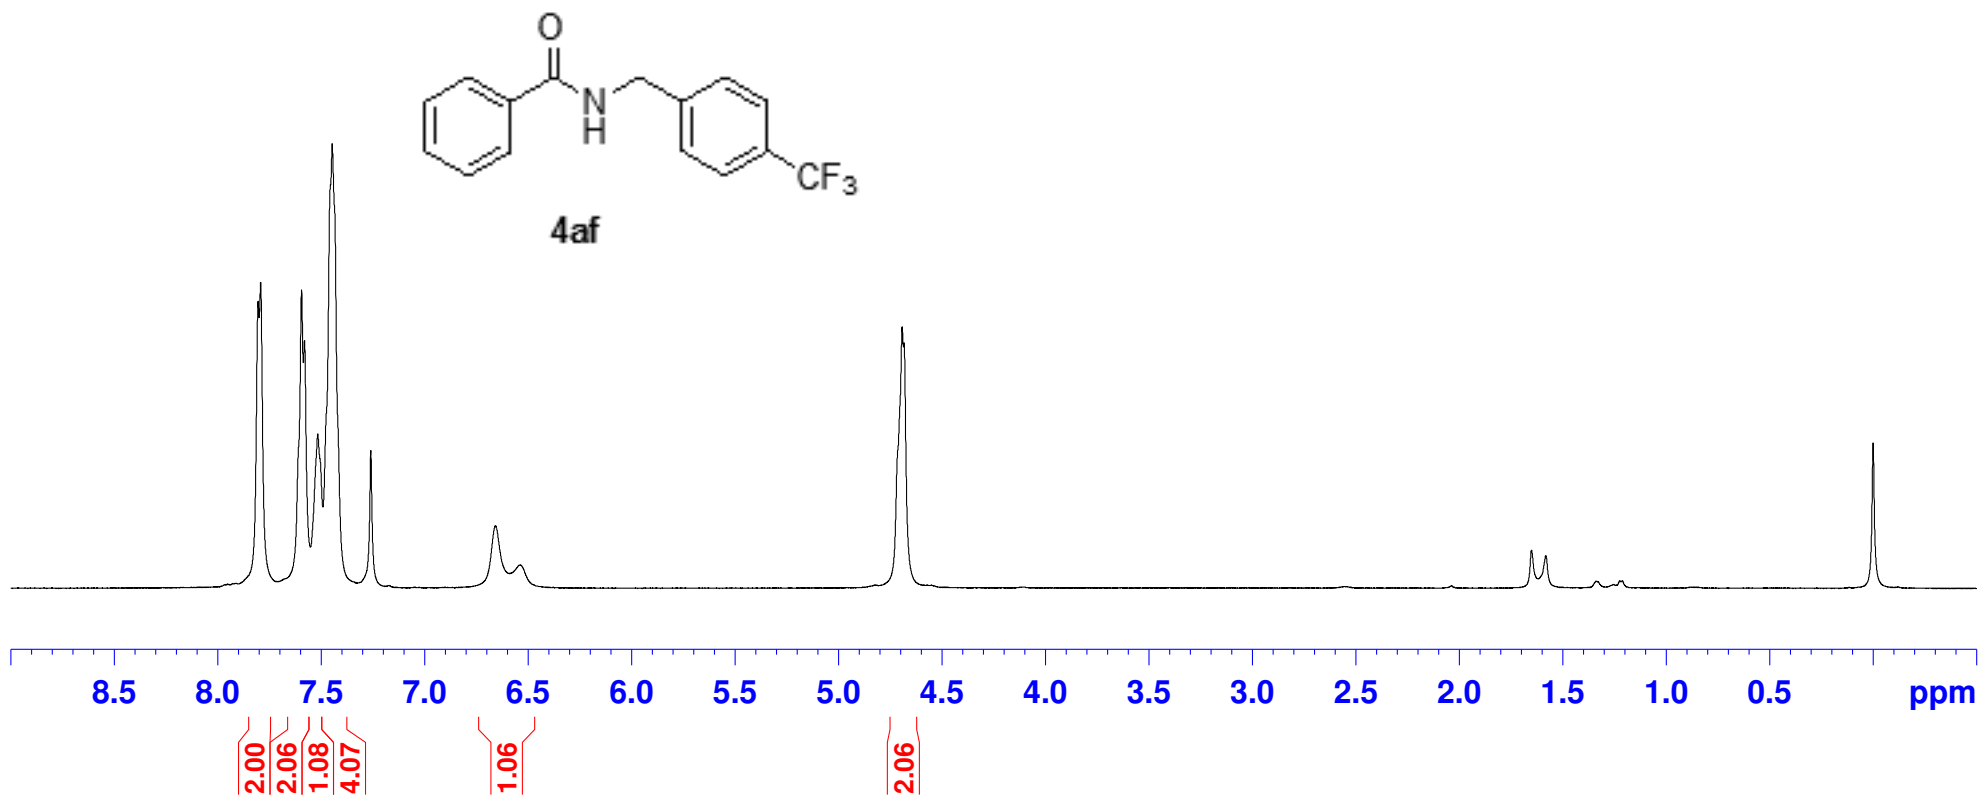

N-(4-(trifluoromethyl)benzyl)benzamide  
C13CPD CDCl3

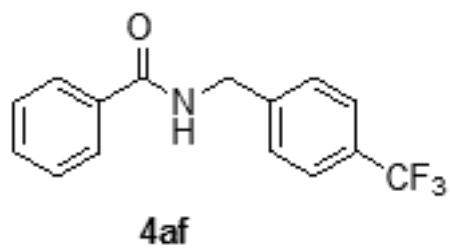

—167.571

142.411  
134.018  
131.749  
130.173  
129.914  
129.658  
129.401  
128.628  
127.898  
127.302  
126.968  
125.661  
125.634  
125.606  
125.576  
125.140  
122.977  
120.812

—77.000

—43.475

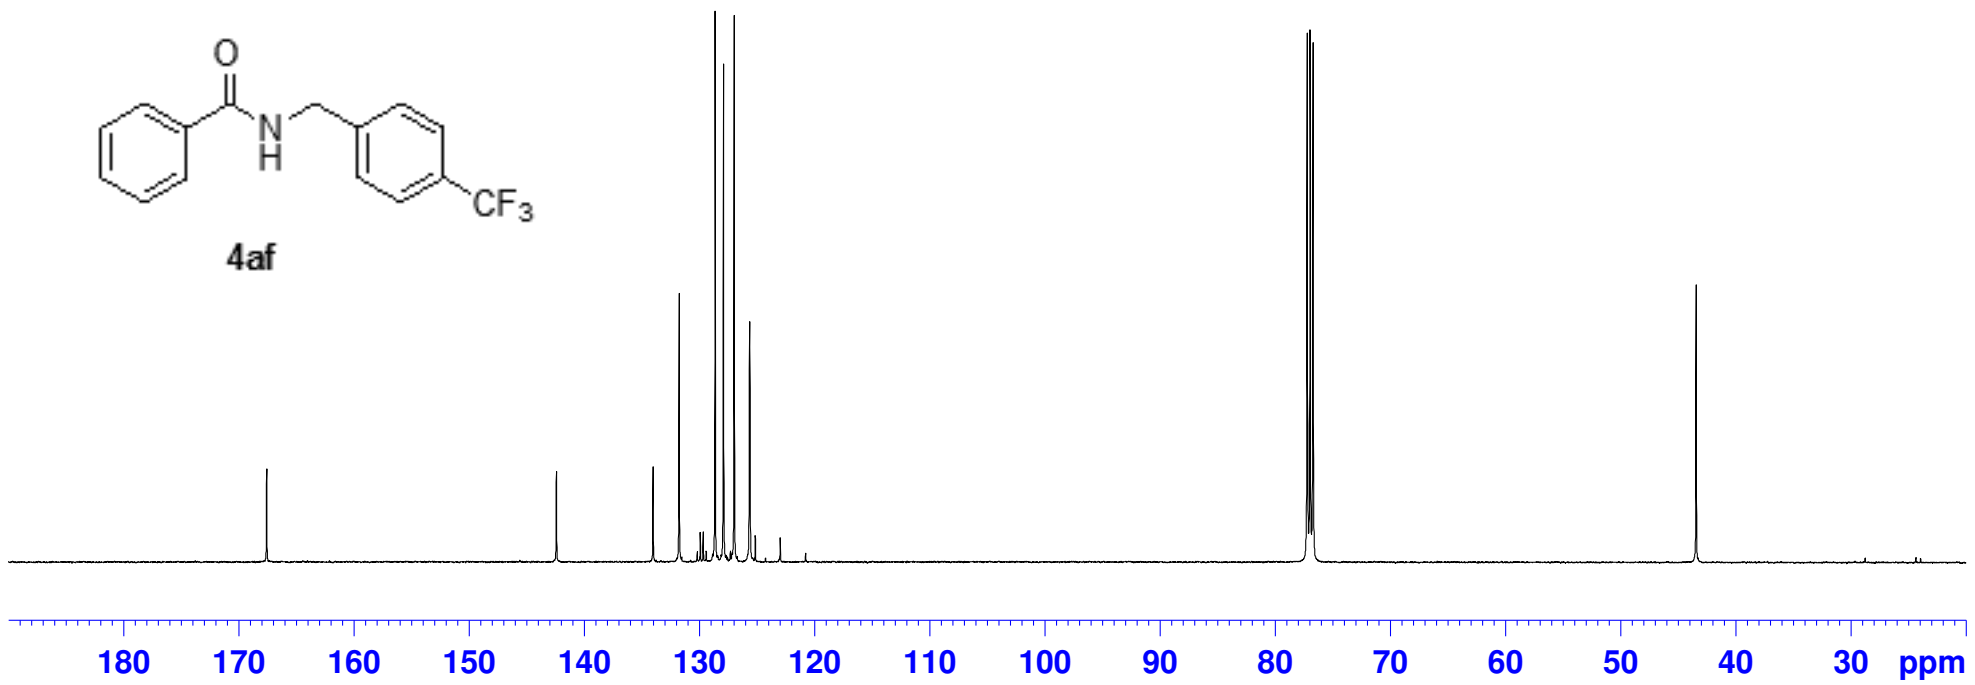

N-(4-(trifluoromethoxy)benzyl)benzamide  
Proton CDCl<sub>3</sub>

7.803  
7.788  
7.531  
7.517  
7.502  
7.454  
7.439  
7.424  
7.392  
7.375  
7.261  
7.203  
7.186  
6.496

4.657  
4.645

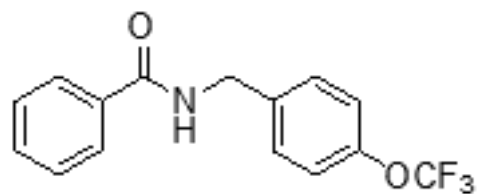

4ag

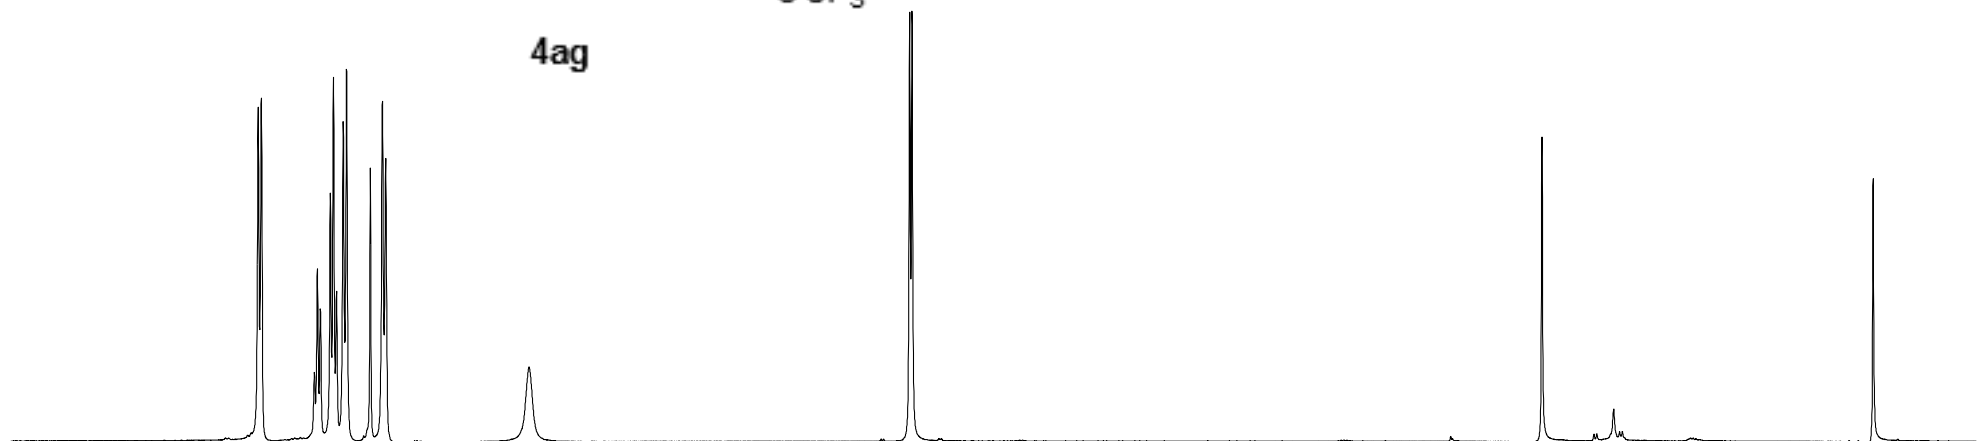

8.5

8.0

7.5

7.0

6.5

6.0

5.5

5.0

4.5

4.0

3.5

3.0

2.5

2.0

1.5

1.0

0.5

ppm

2.00

1.06

2.05

2.00

2.00

1.03

2.10

N-(4-(trifluoromethoxy)benzyl)benzamide  
C13CPD CDCl3

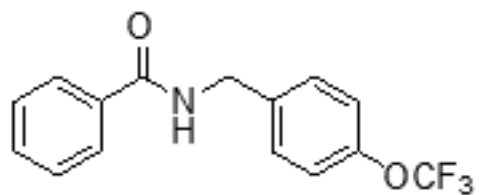

4ag

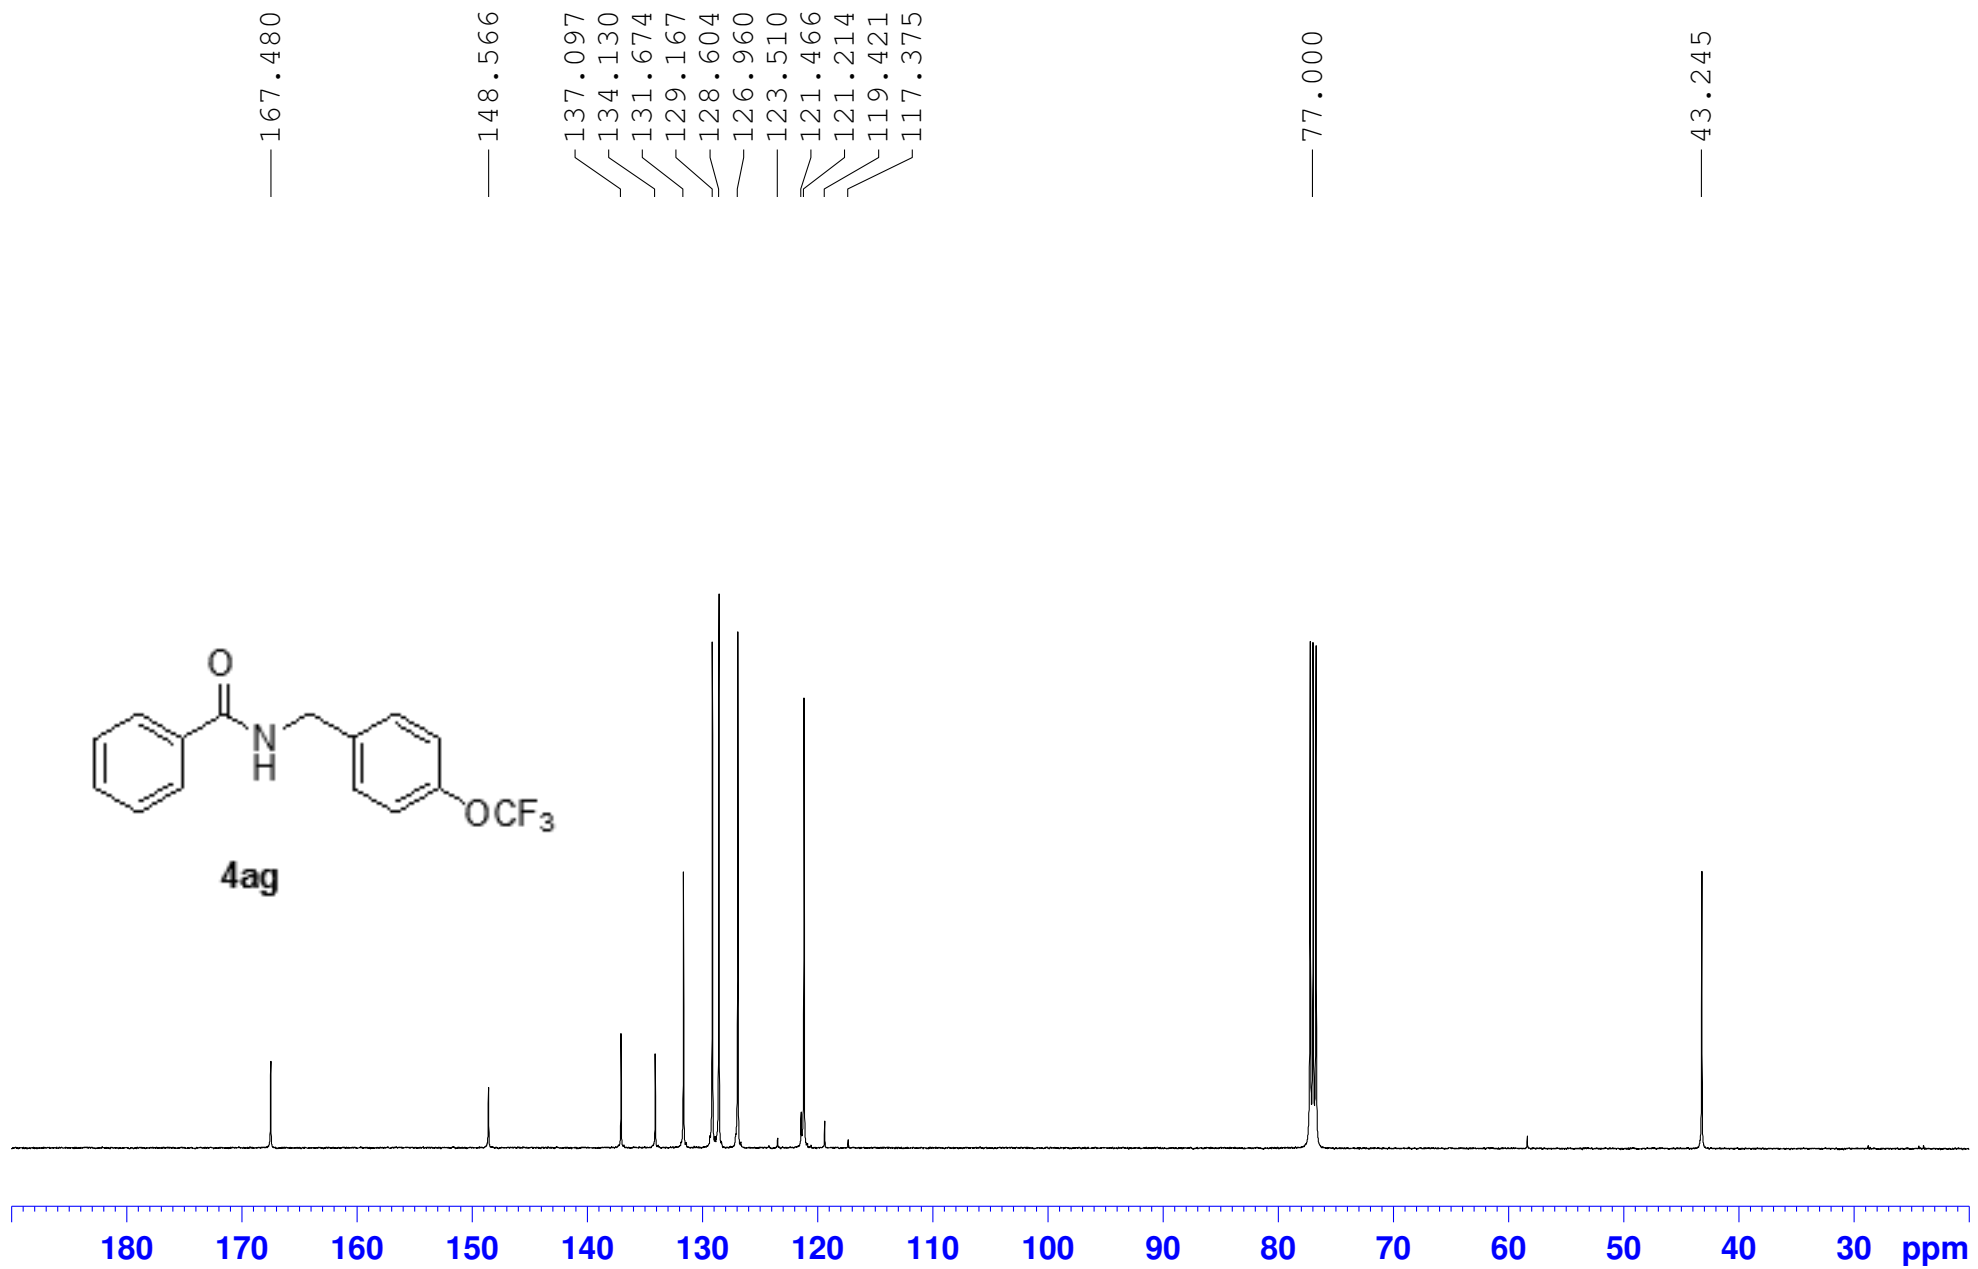

N-(2-methylbenzyl)benzamide  
Proton CDCl<sub>3</sub>

7.784  
7.769  
7.512  
7.497  
7.483  
7.439  
7.424  
7.409  
7.310  
7.296  
7.257  
7.250  
7.233  
7.214  
7.200  
7.186  
6.220

4.651  
4.640

2.376

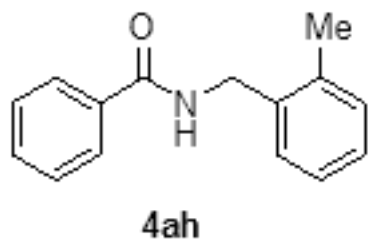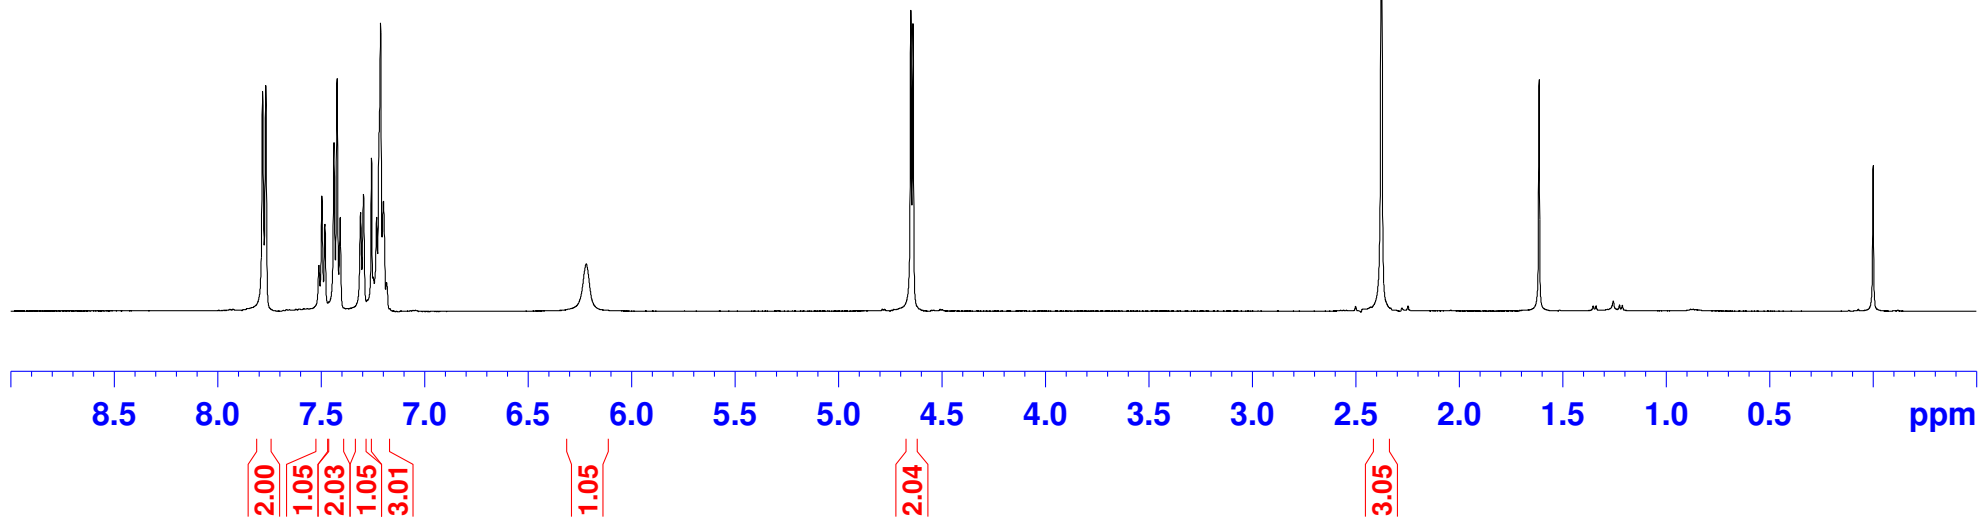



N-(2-methylbenzyl)benzamide  
C13CPD CDCl3

— 167.194

136.566  
135.726  
134.326  
131.475  
130.589  
128.650  
128.542  
127.862  
126.895  
126.241

— 77.000

— 42.298

— 19.006

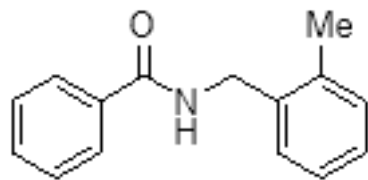

4ah

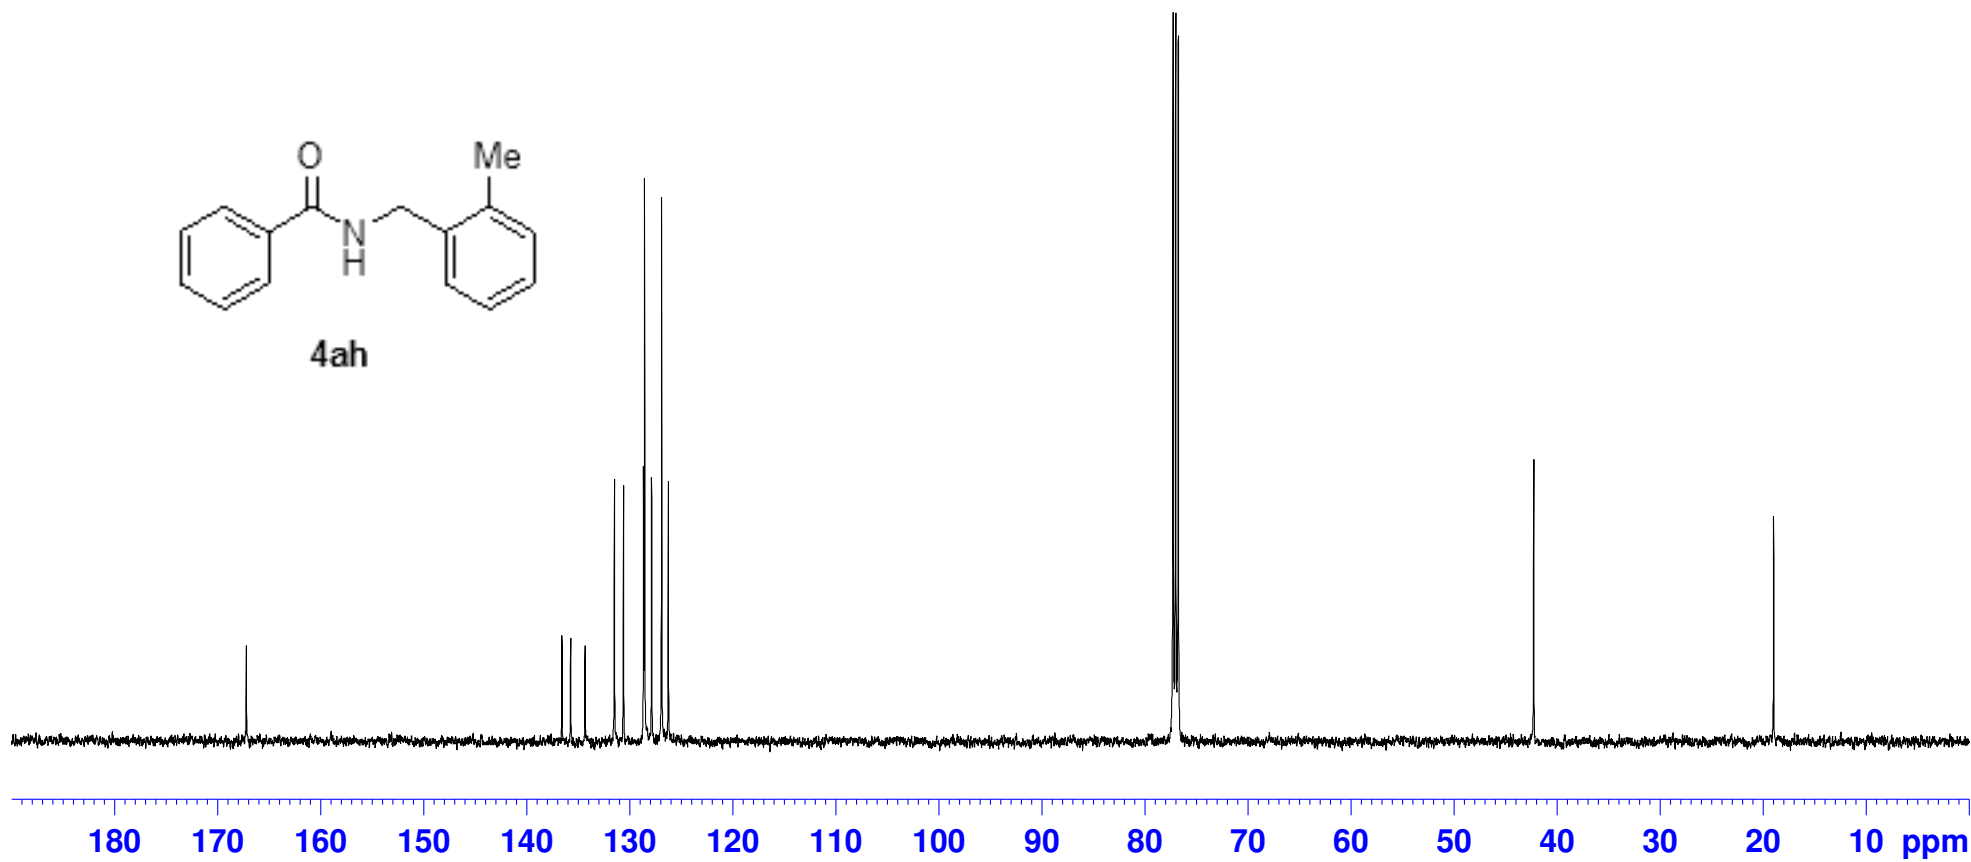

N-(4-methylbenzyl)benzamide  
Proton CDCl<sub>3</sub>

7.786  
7.771  
7.506  
7.491  
7.476  
7.434  
7.418  
7.403  
7.257  
7.241  
7.169  
7.154  
— 6.377

4.607  
4.596

— 2.345

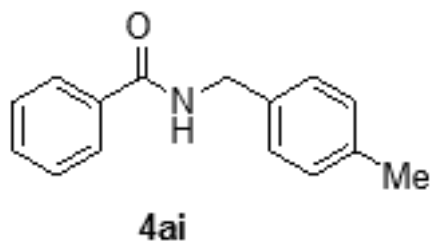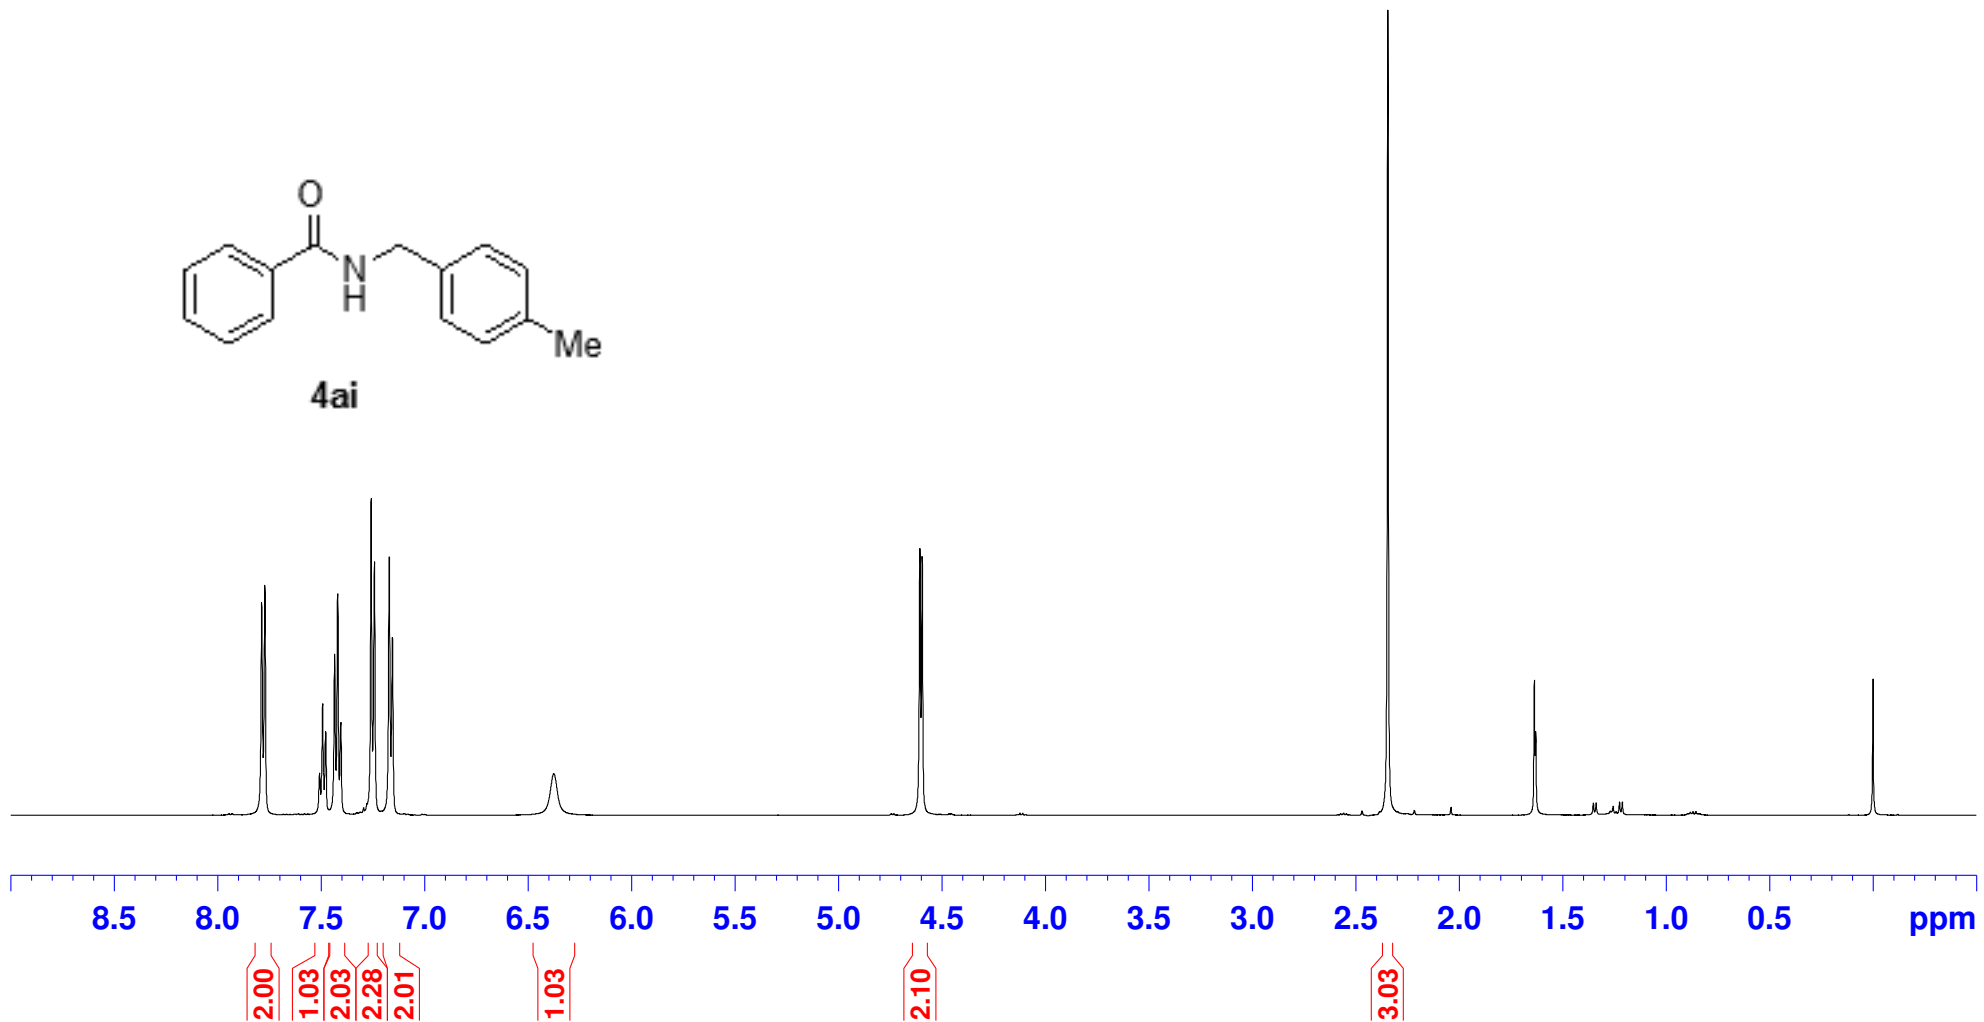

N-(4-methylbenzyl)benzamide  
C13CPD CDC13

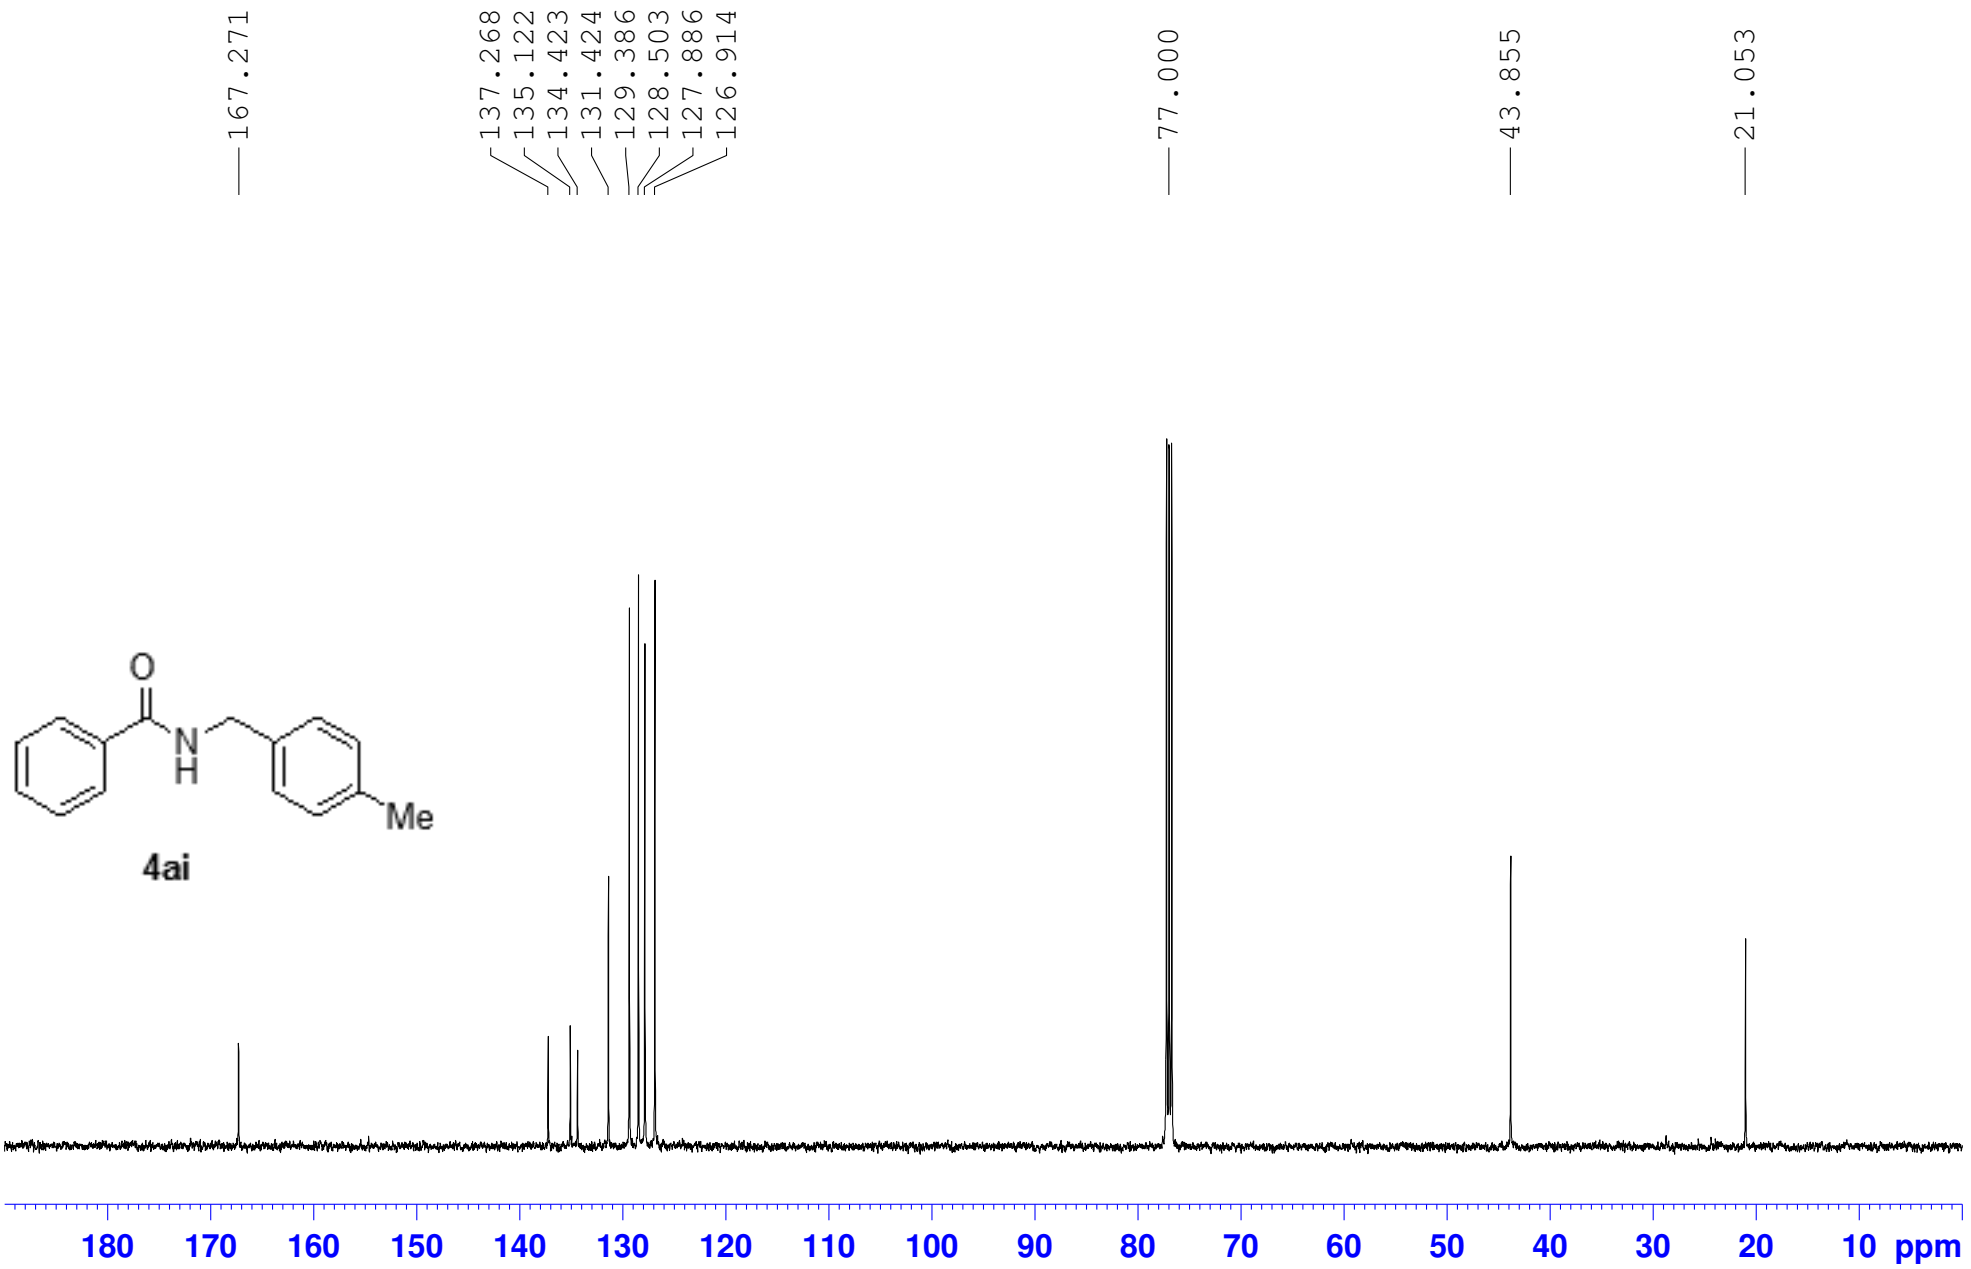

N-(4-methoxybenzyl)benzamide  
Proton CDCl<sub>3</sub>

7.784  
7.769  
7.506  
7.492  
7.478  
7.434  
7.419  
7.404  
7.293  
7.276  
7.260  
6.892  
6.876  
6.363

4.583  
4.573

3.802

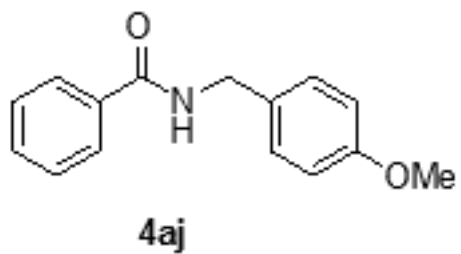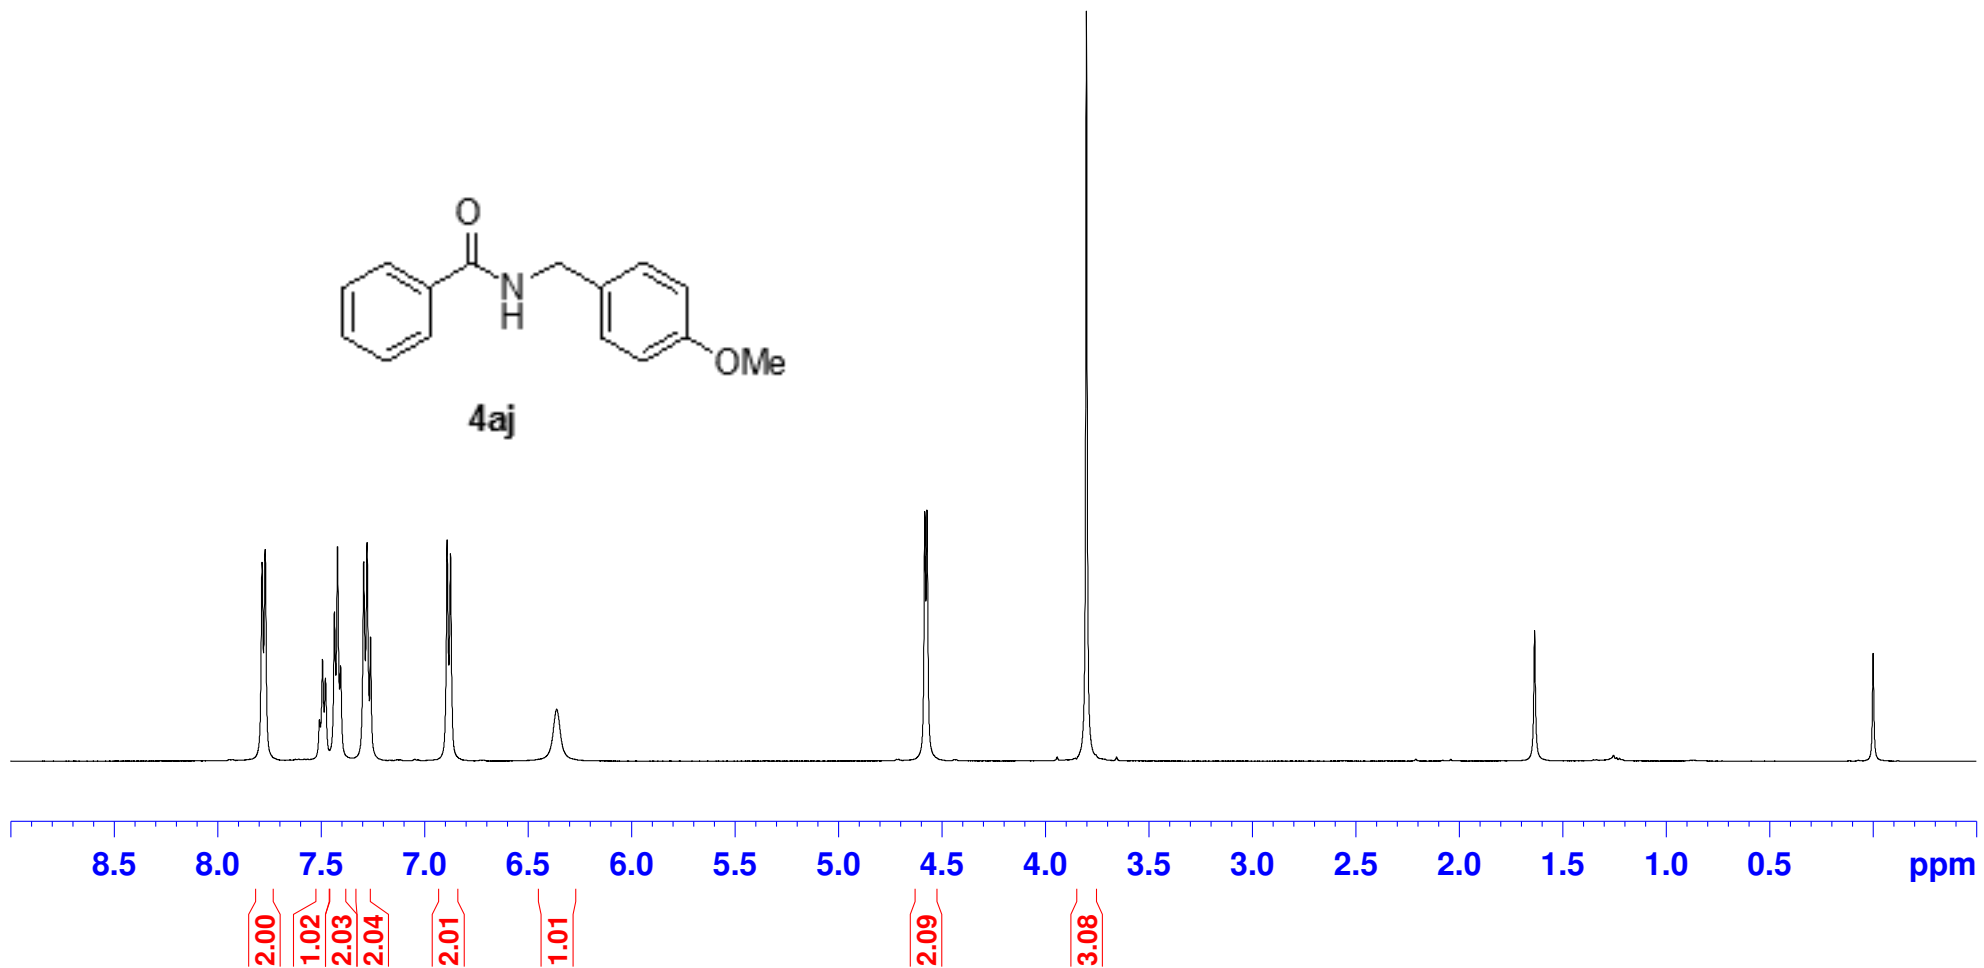

N-(4-methoxybenzyl)benzamide  
C13CPD CDC13

— 167.250

— 159.038

134.407

131.403

130.264

129.210

128.478

126.908

— 114.091

— 77.000

— 55.249

— 43.534

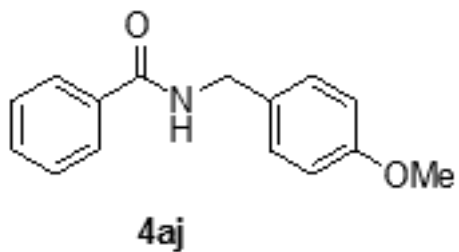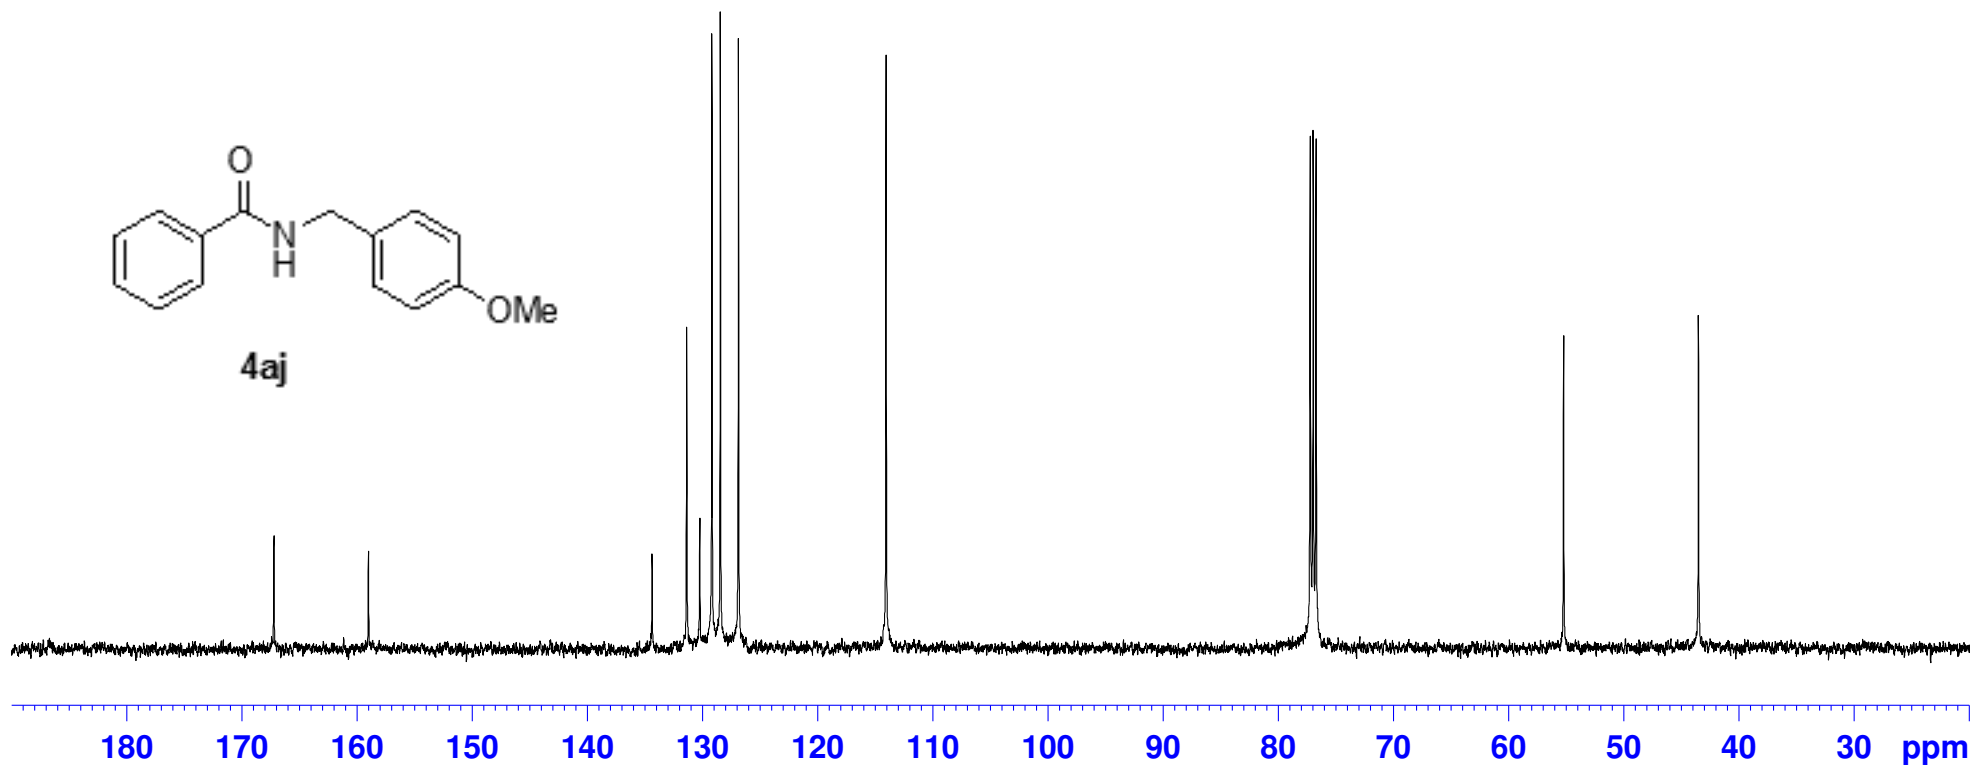

N-(naphthalen-2-ylmethyl)benzamide  
Proton CDCl<sub>3</sub>

7.838  
7.820  
7.803  
7.784  
7.501  
7.486  
7.478  
7.444  
7.429  
7.415  
7.256  
— 6.541

4.809  
4.799

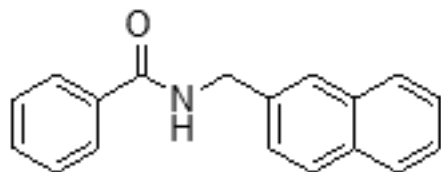

4ak

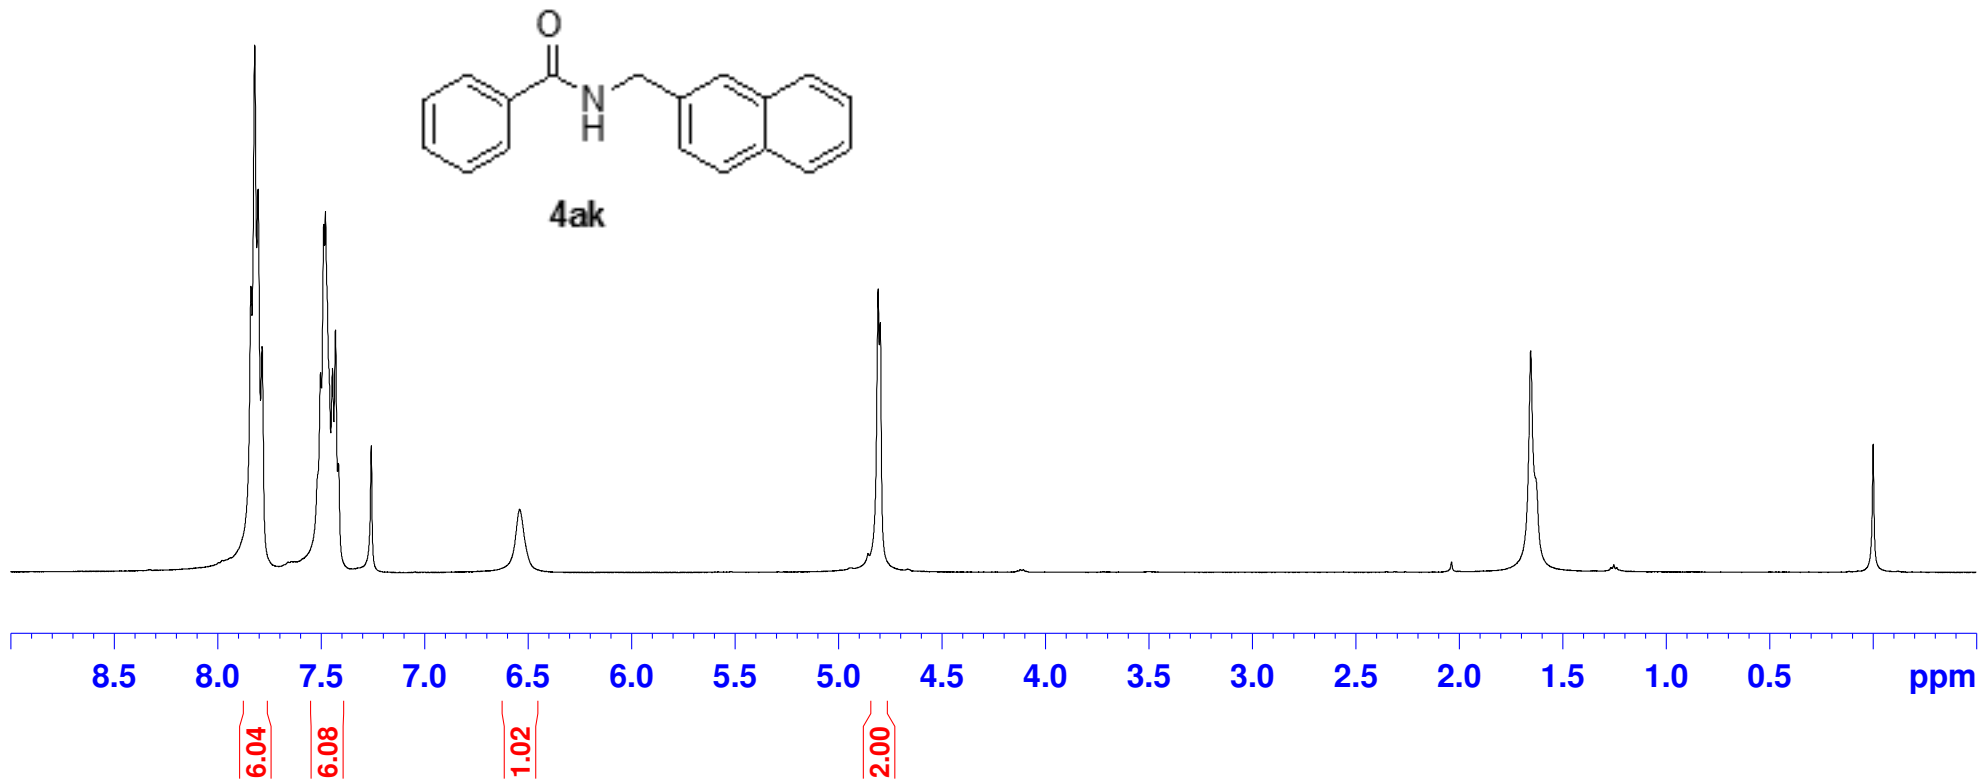

N-(naphthalen-2-ylmethyl)benzamide  
C13CPD CDC13

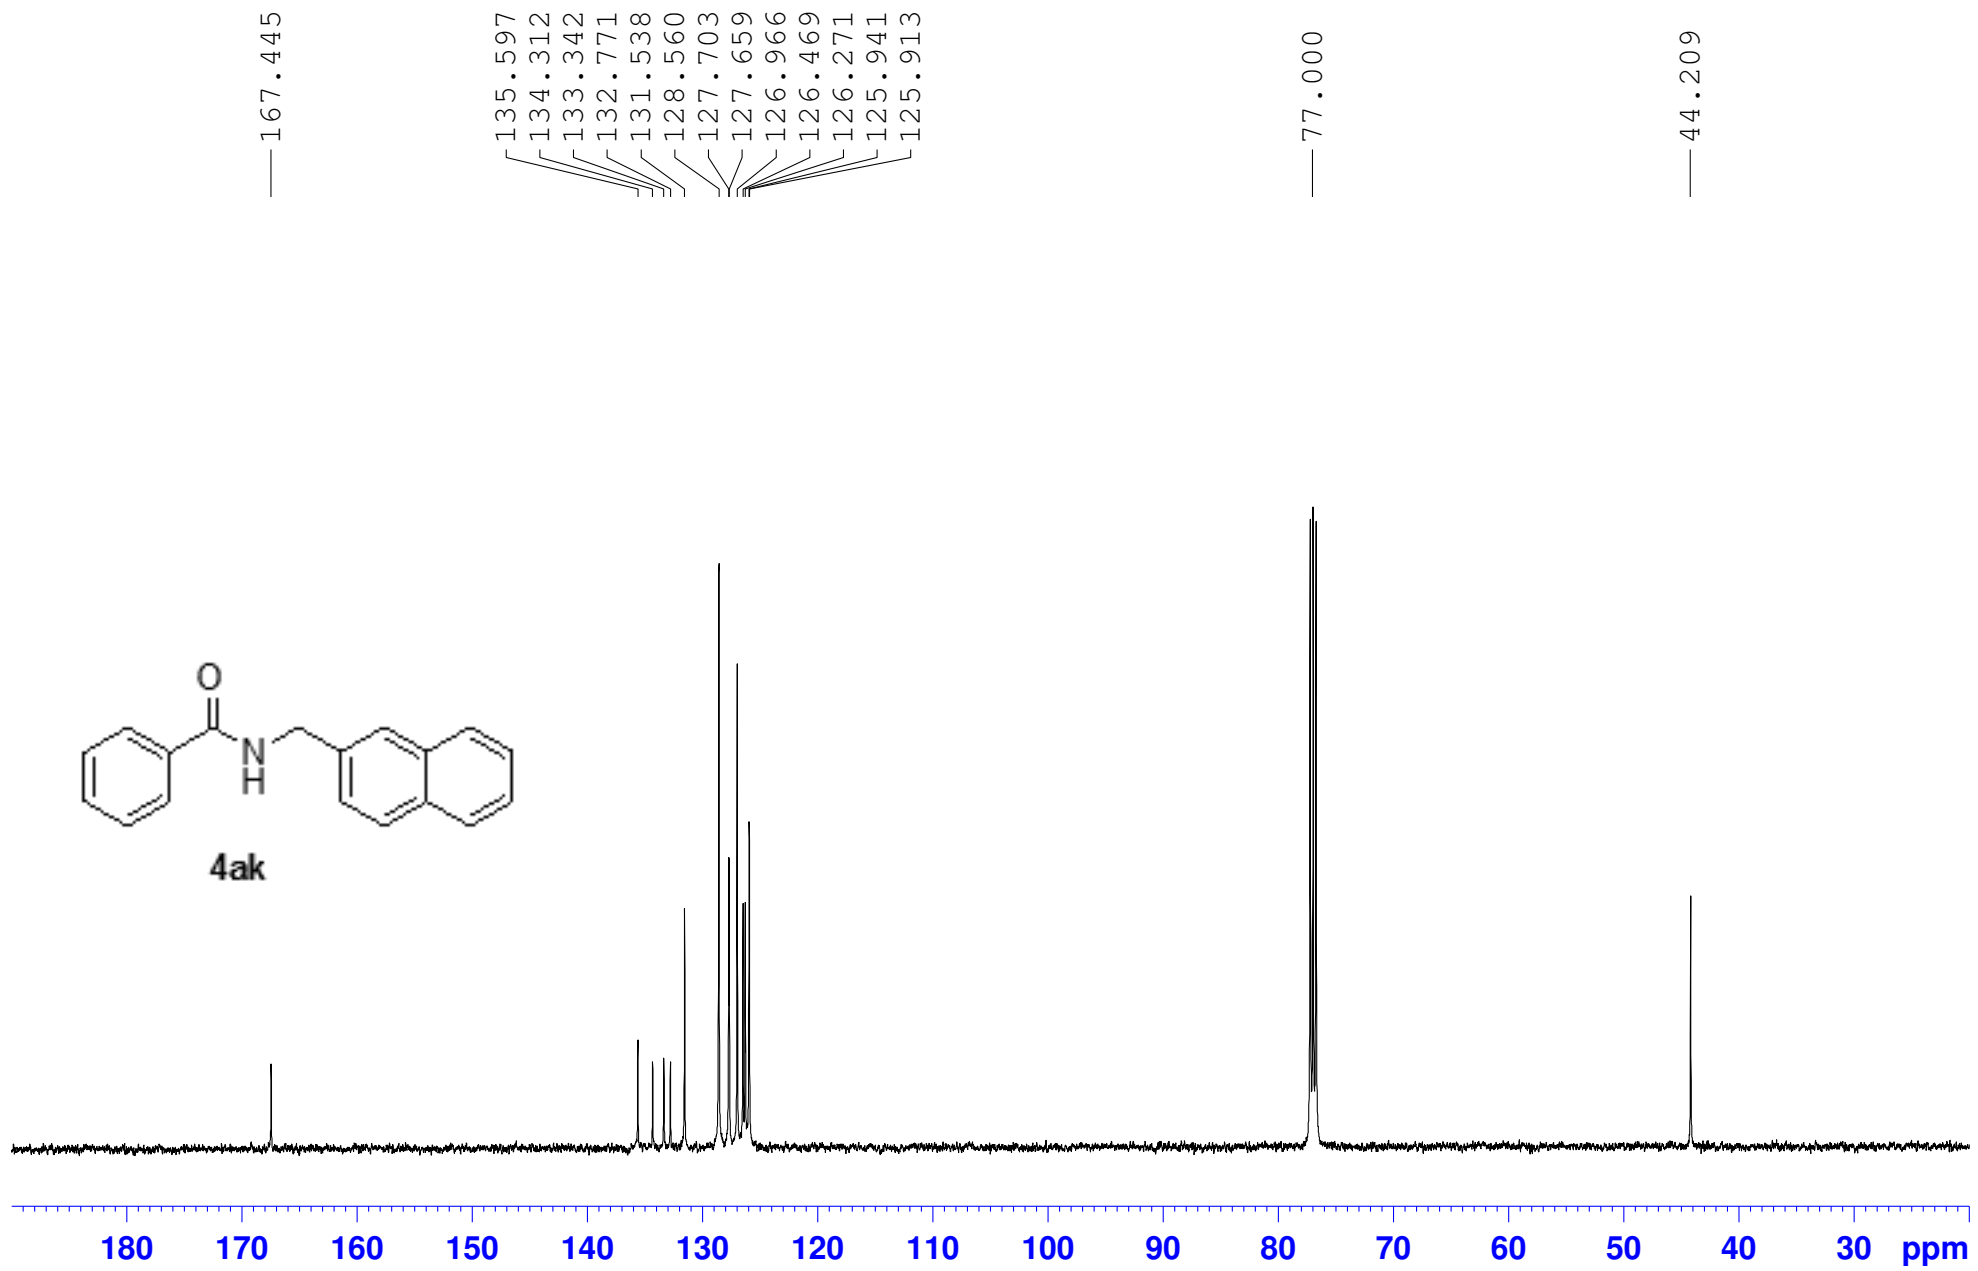

N-(thiophen-2-ylmethyl)benzamide  
Proton CDCl<sub>3</sub>

7.790  
7.775  
7.517  
7.503  
7.488  
7.444  
7.428  
7.414  
7.259  
7.256  
7.245  
7.050  
7.044  
6.983  
6.976  
6.973  
6.966  
6.450

4.827  
4.815

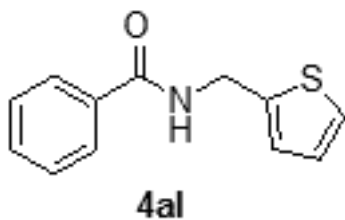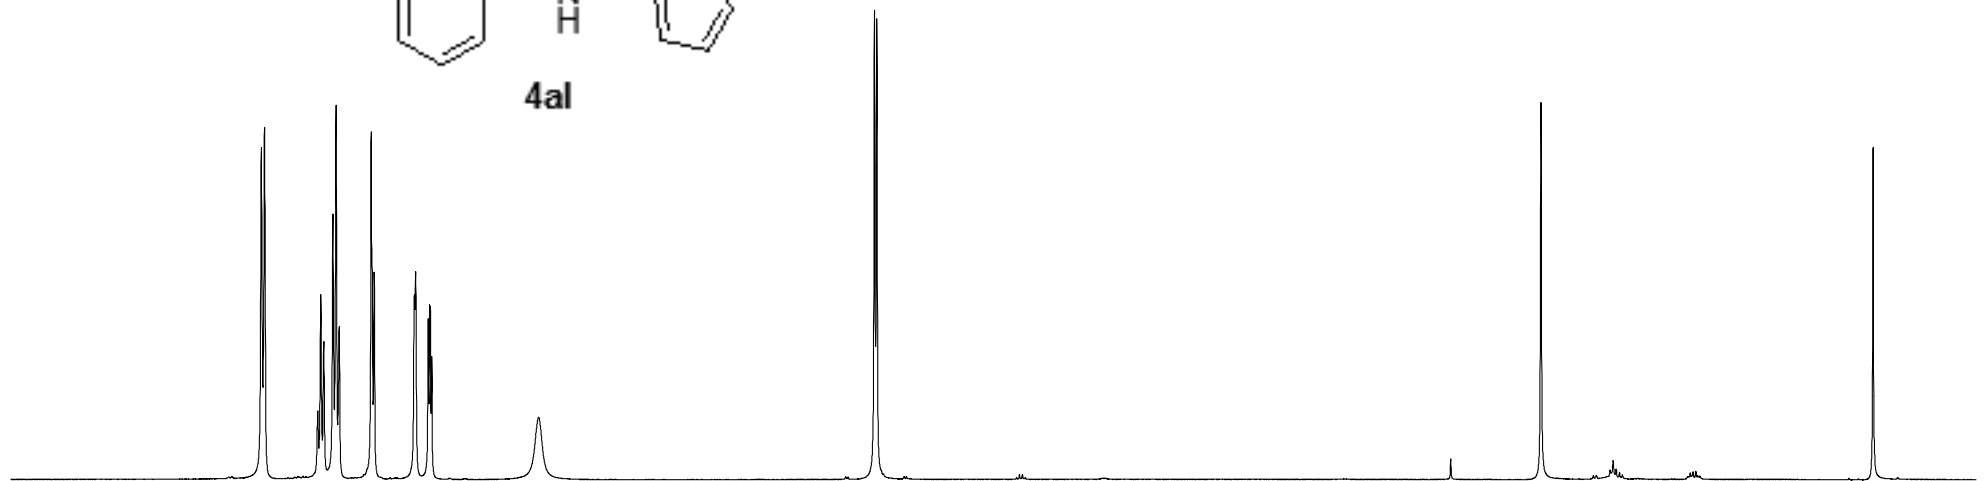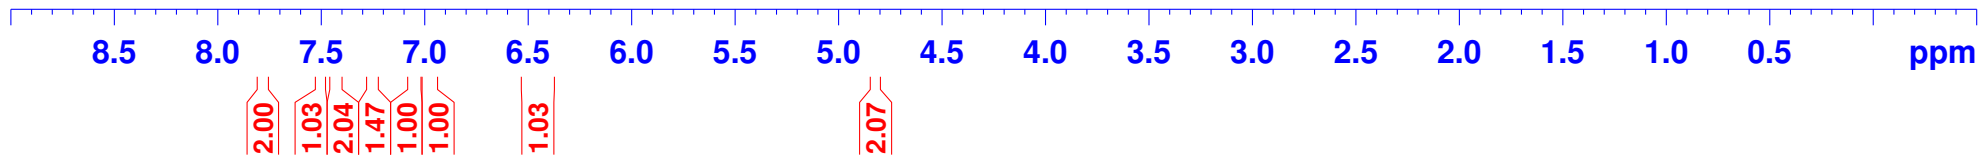



N-(thiophen-2-ylmethyl)benzamide  
C13CPD CDCl3

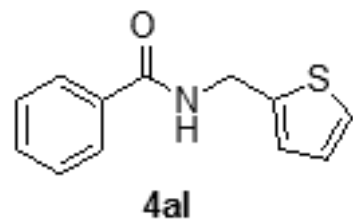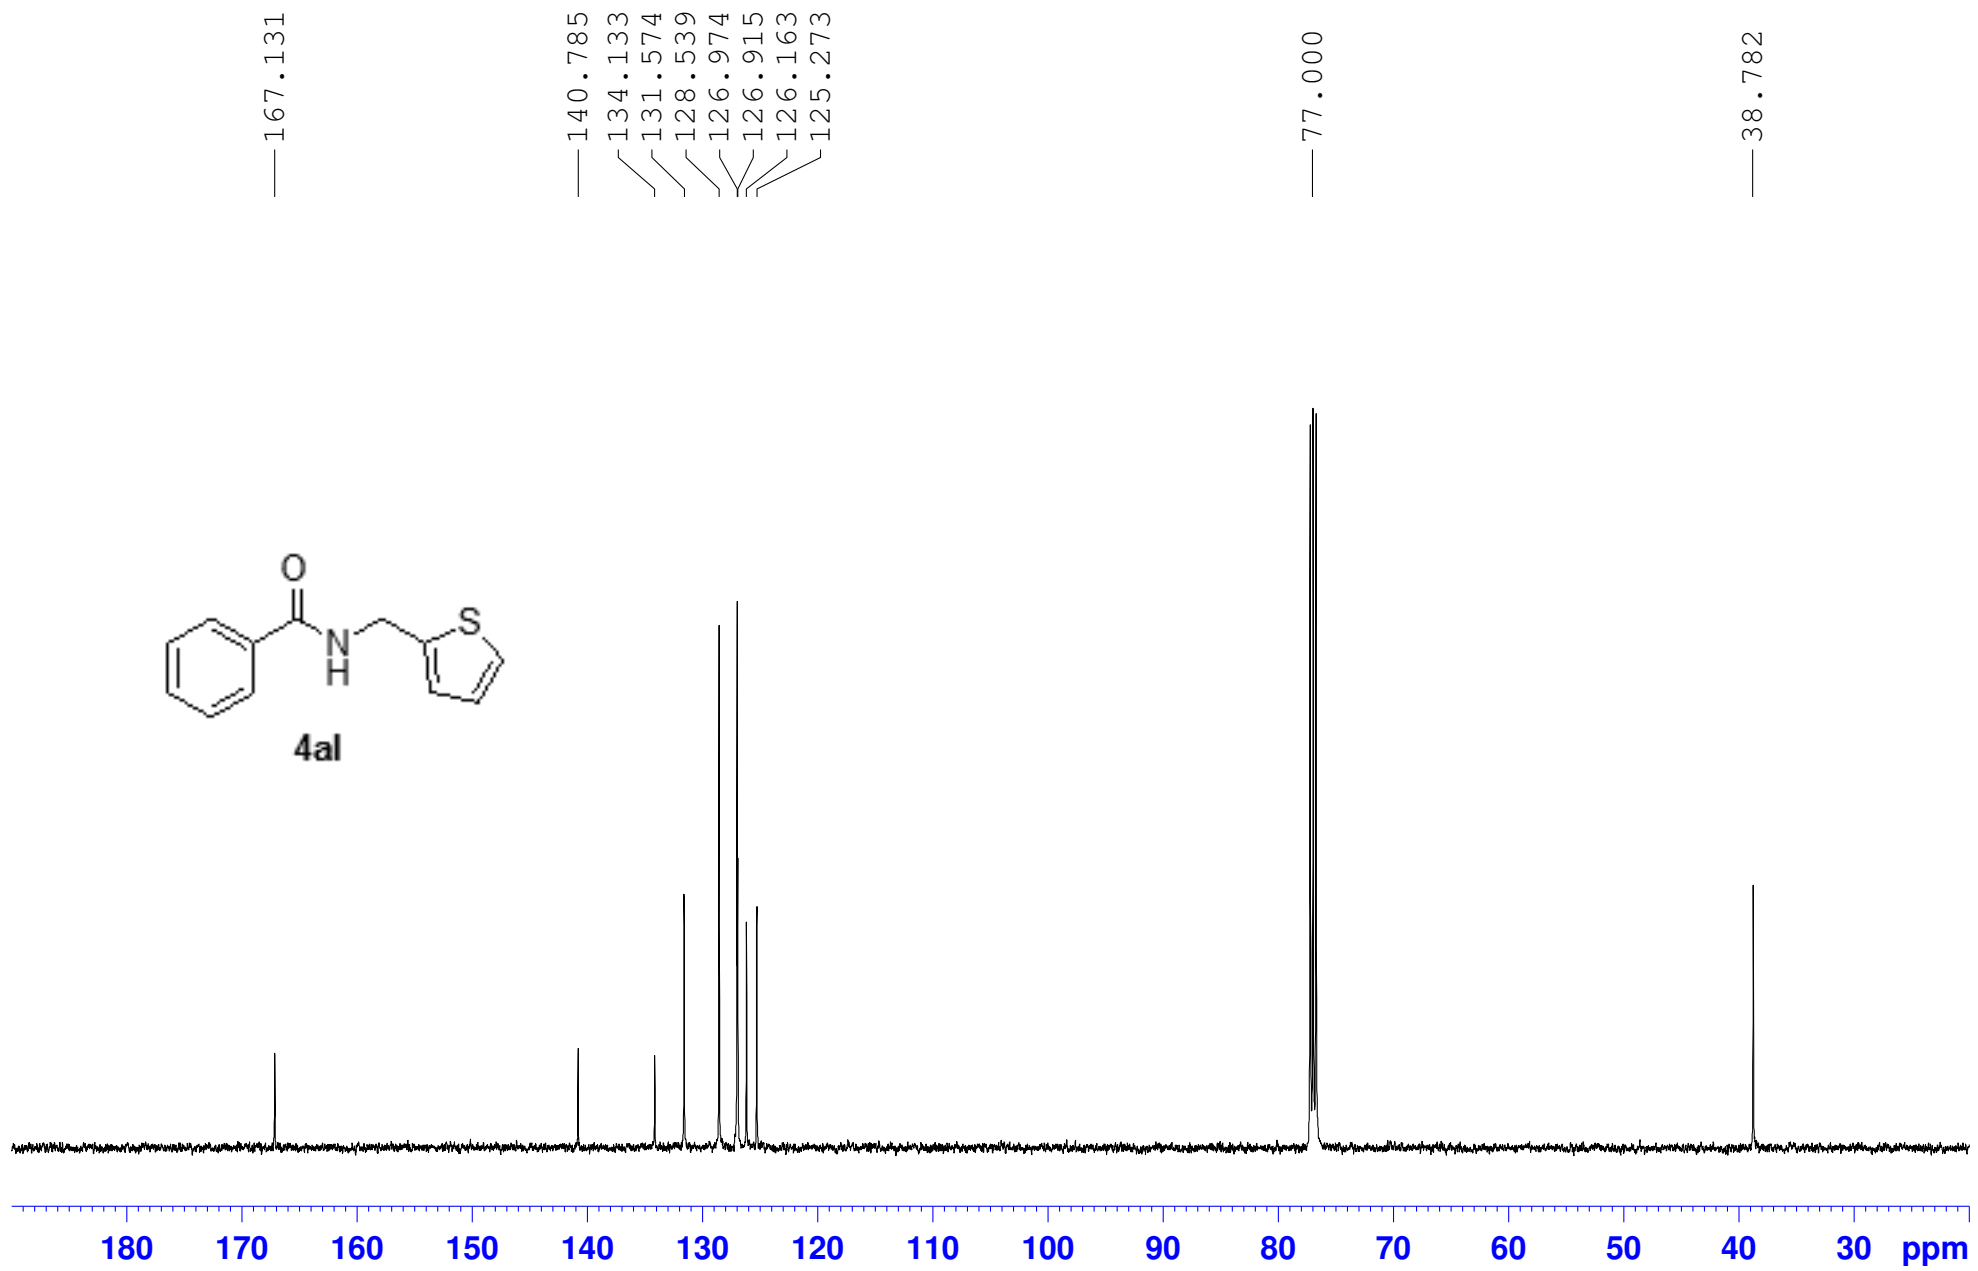

N-(furan-2-ylmethyl)benzamide  
Proton CDCl<sub>3</sub>

7.792  
7.777  
7.516  
7.502  
7.487  
7.444  
7.429  
7.414  
7.379  
7.261  
6.441  
6.344  
6.306  
6.301

4.652  
4.642

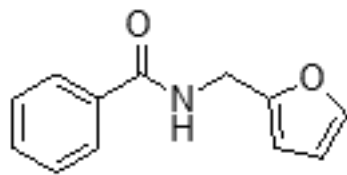

4am

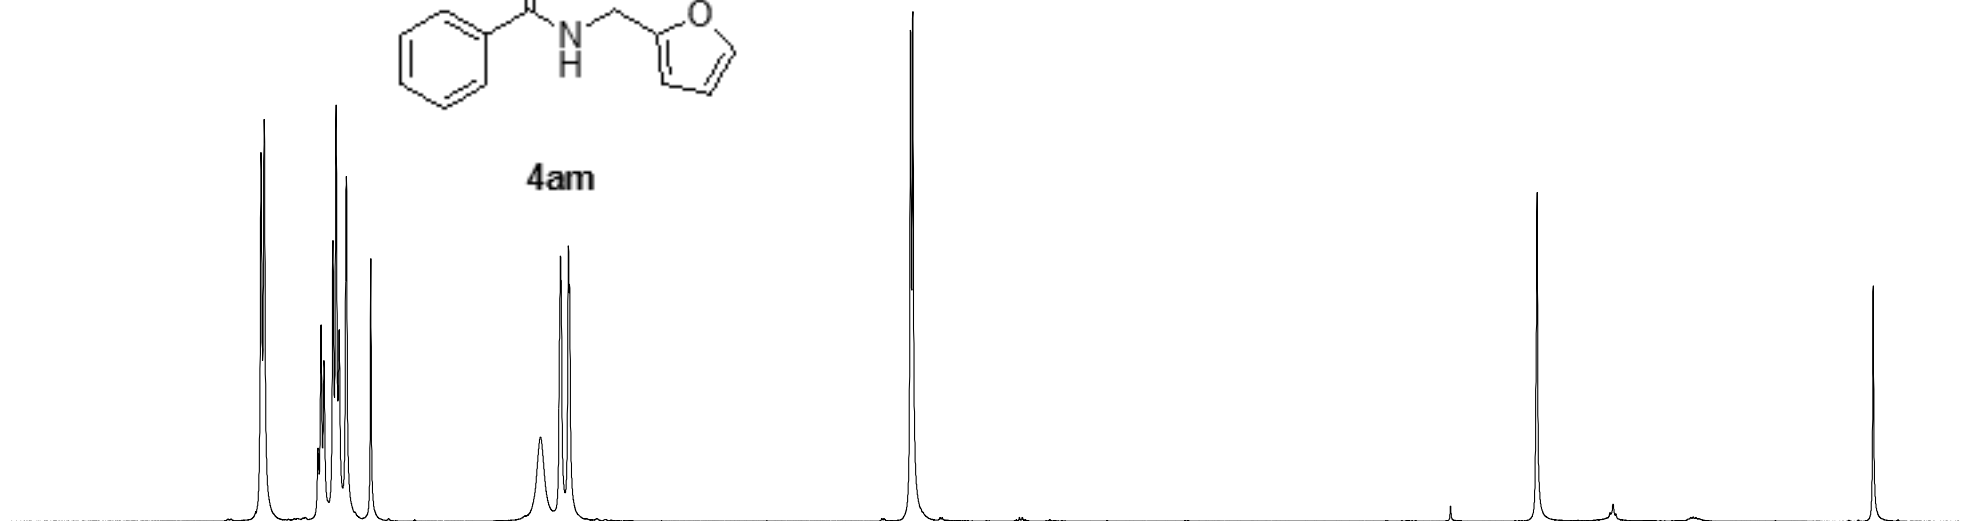

8.5 8.0 7.5 7.0 6.5 6.0 5.5 5.0 4.5 4.0 3.5 3.0 2.5 2.0 1.5 1.0 0.5 ppm

2.00  
1.03  
2.06  
1.01

1.01  
1.01  
1.09

2.08

N-(furan-2-ylmethyl)benzamide  
C13CPD CDC13

— 167.188

— 151.175

— 142.242

— 134.141

— 131.552

— 128.515

— 126.966

— 110.474

— 107.626

— 77.000

— 36.966

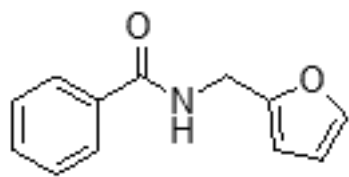

4am

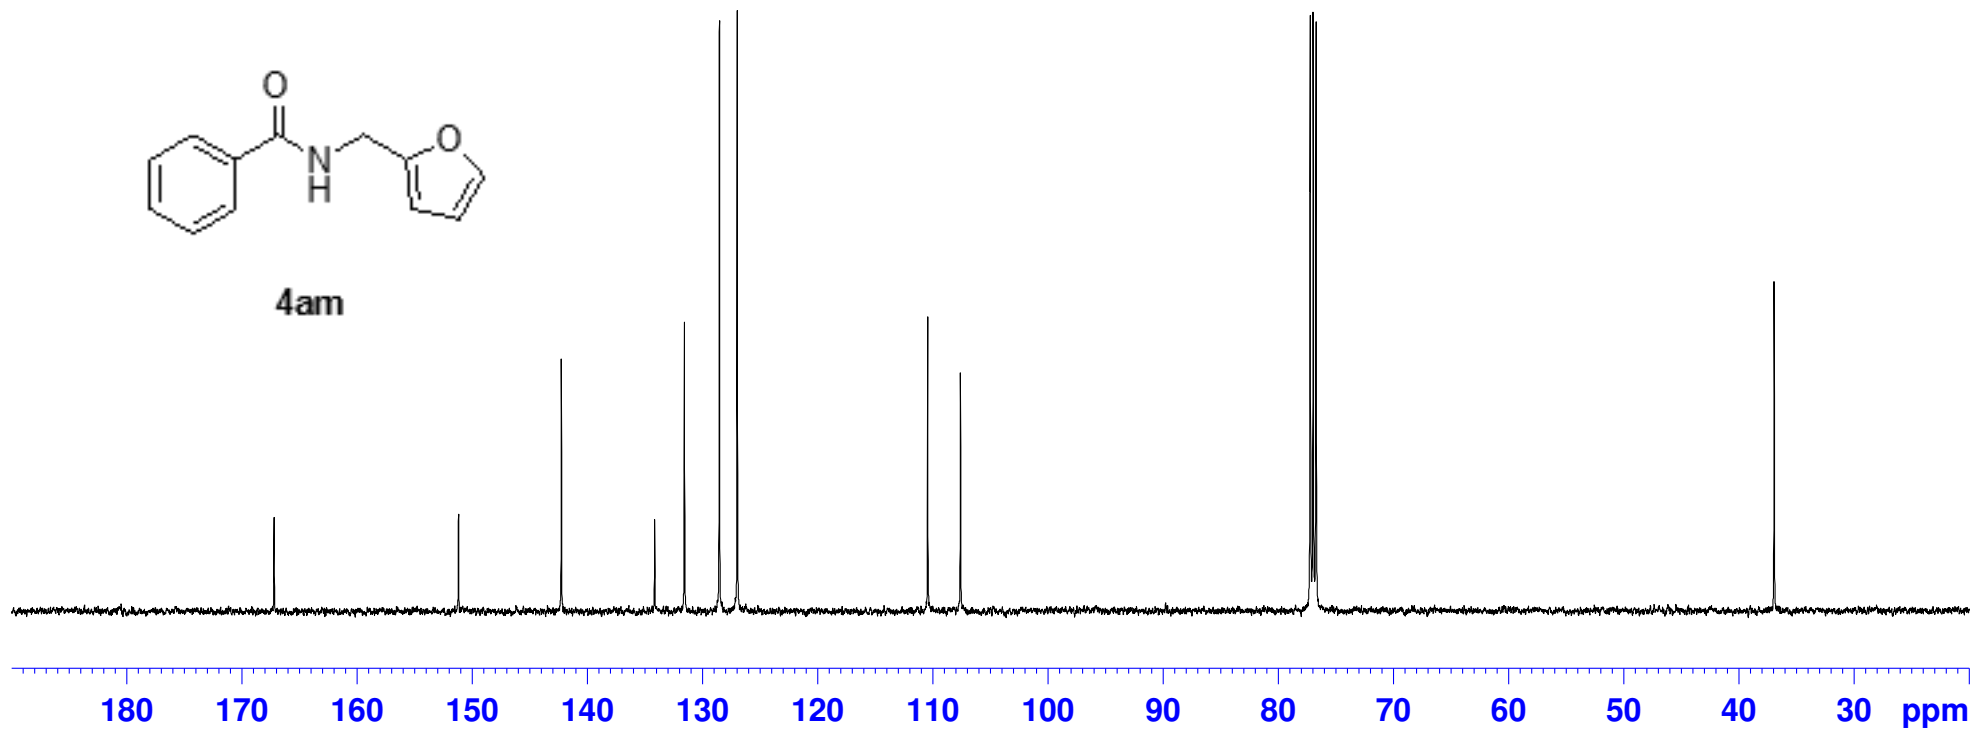

N-(Ferrocenemethyl)benzamide  
Proton CDCl<sub>3</sub>

7.785  
7.770  
7.521  
7.507  
7.492  
7.458  
7.442  
7.428  
7.263

— 6.295

4.346  
4.335  
4.269  
4.208  
4.180

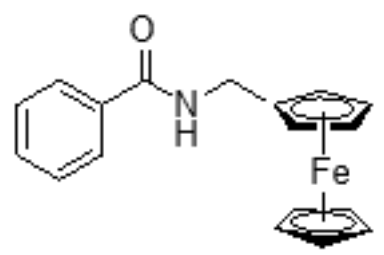

4an

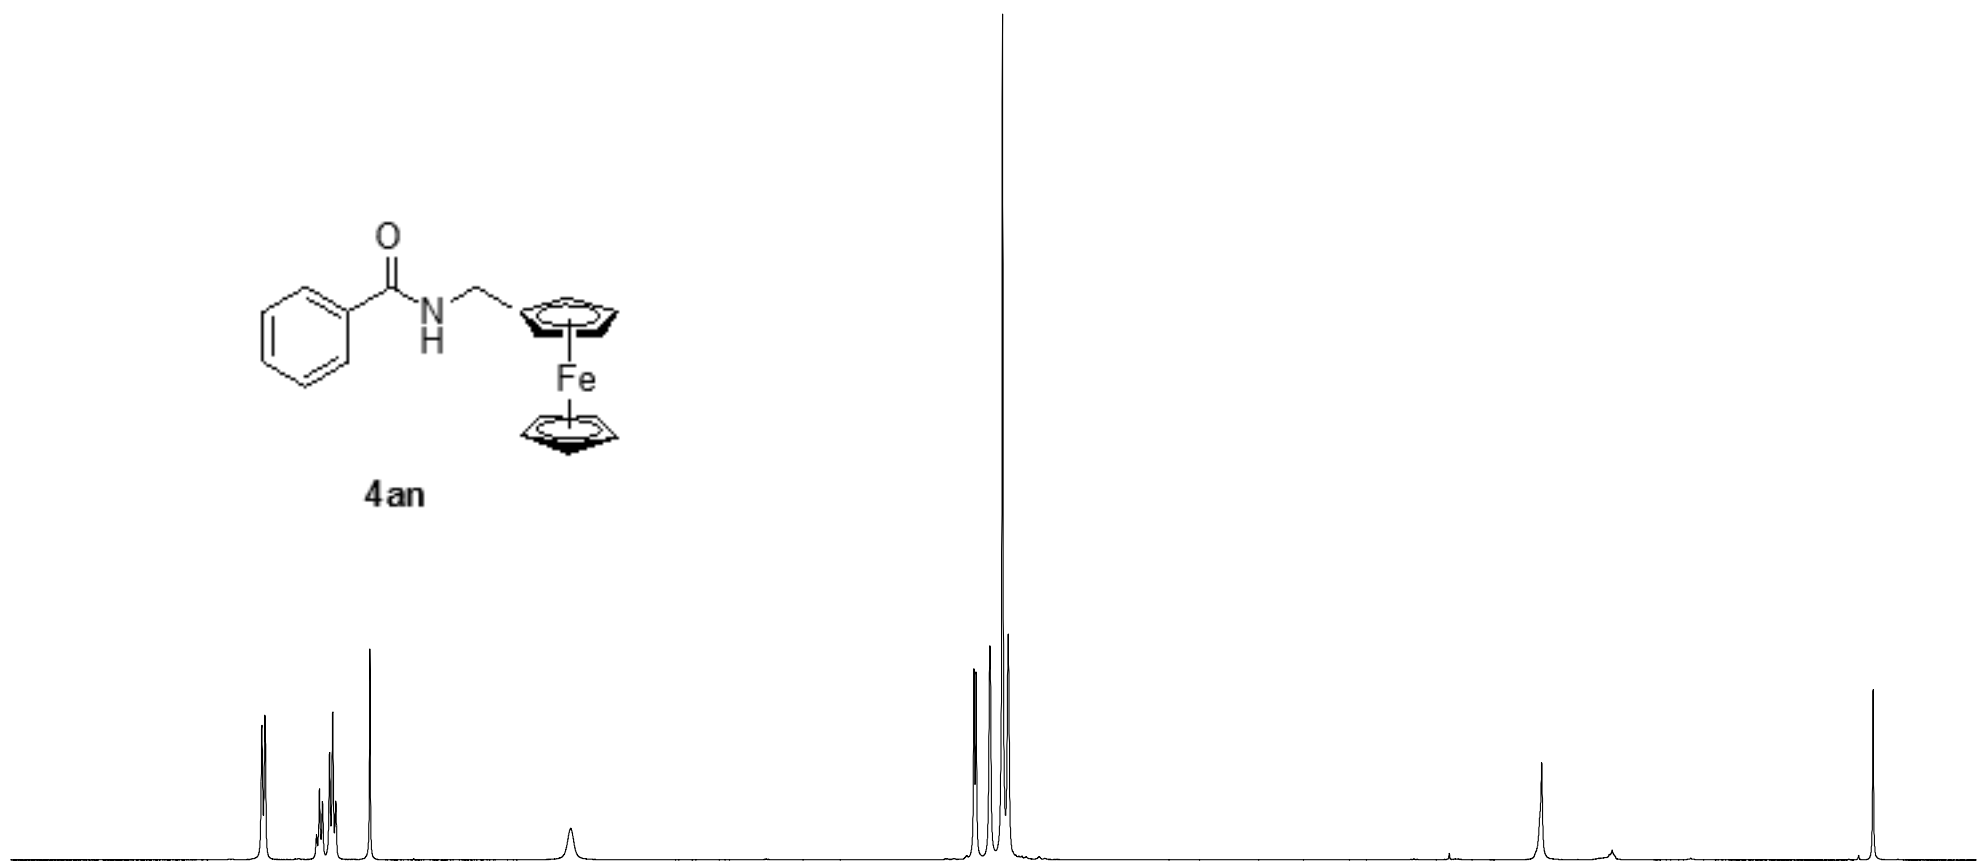

8.5

8.0

7.5

7.0

6.5

6.0

5.5

5.0

4.5

4.0

3.5

3.0

2.5

2.0

1.5

1.0

0.5

ppm

2.00

1.03

2.01

1.06

2.05

2.08

4.96

2.03



N-hexylbenzamide  
Proton CDCl<sub>3</sub>

7.765  
7.750  
7.502  
7.487  
7.473  
7.439  
7.424  
7.409  
7.263

6.143

3.470  
3.457  
3.444  
3.430

1.642  
1.627  
1.613  
1.598  
1.583  
1.397  
1.385  
1.370  
1.357  
1.331  
1.324  
1.317  
0.908  
0.895  
0.882

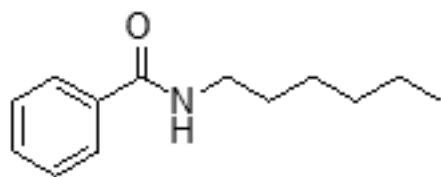

4ao

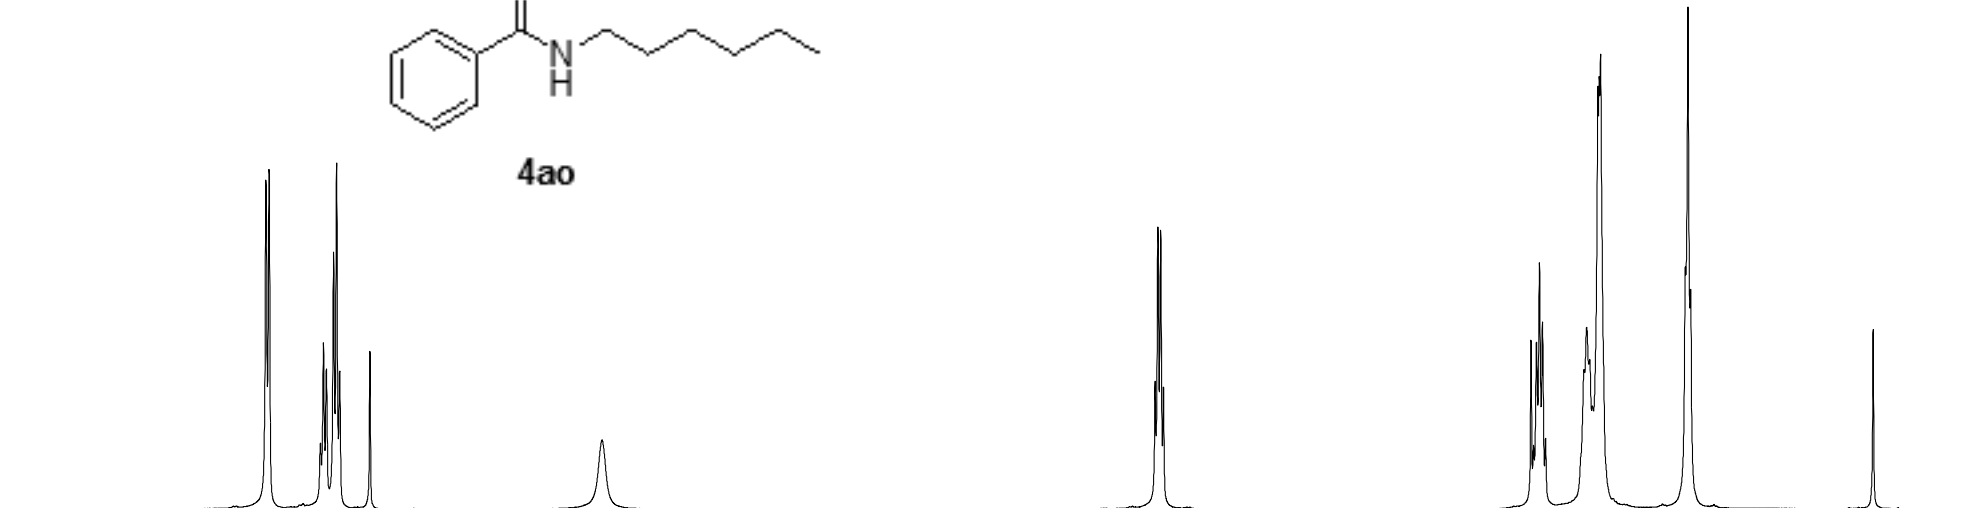

8.5

8.0

7.5

7.0

6.5

6.0

5.5

5.0

4.5

4.0

3.5

3.0

2.5

2.0

1.5

1.0

0.5

ppm

2.00

1.04

2.00

1.04

2.07

2.08

6.14

3.06

N-hexylbenzamide  
C13CPD CDC13

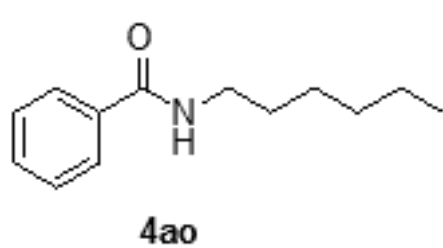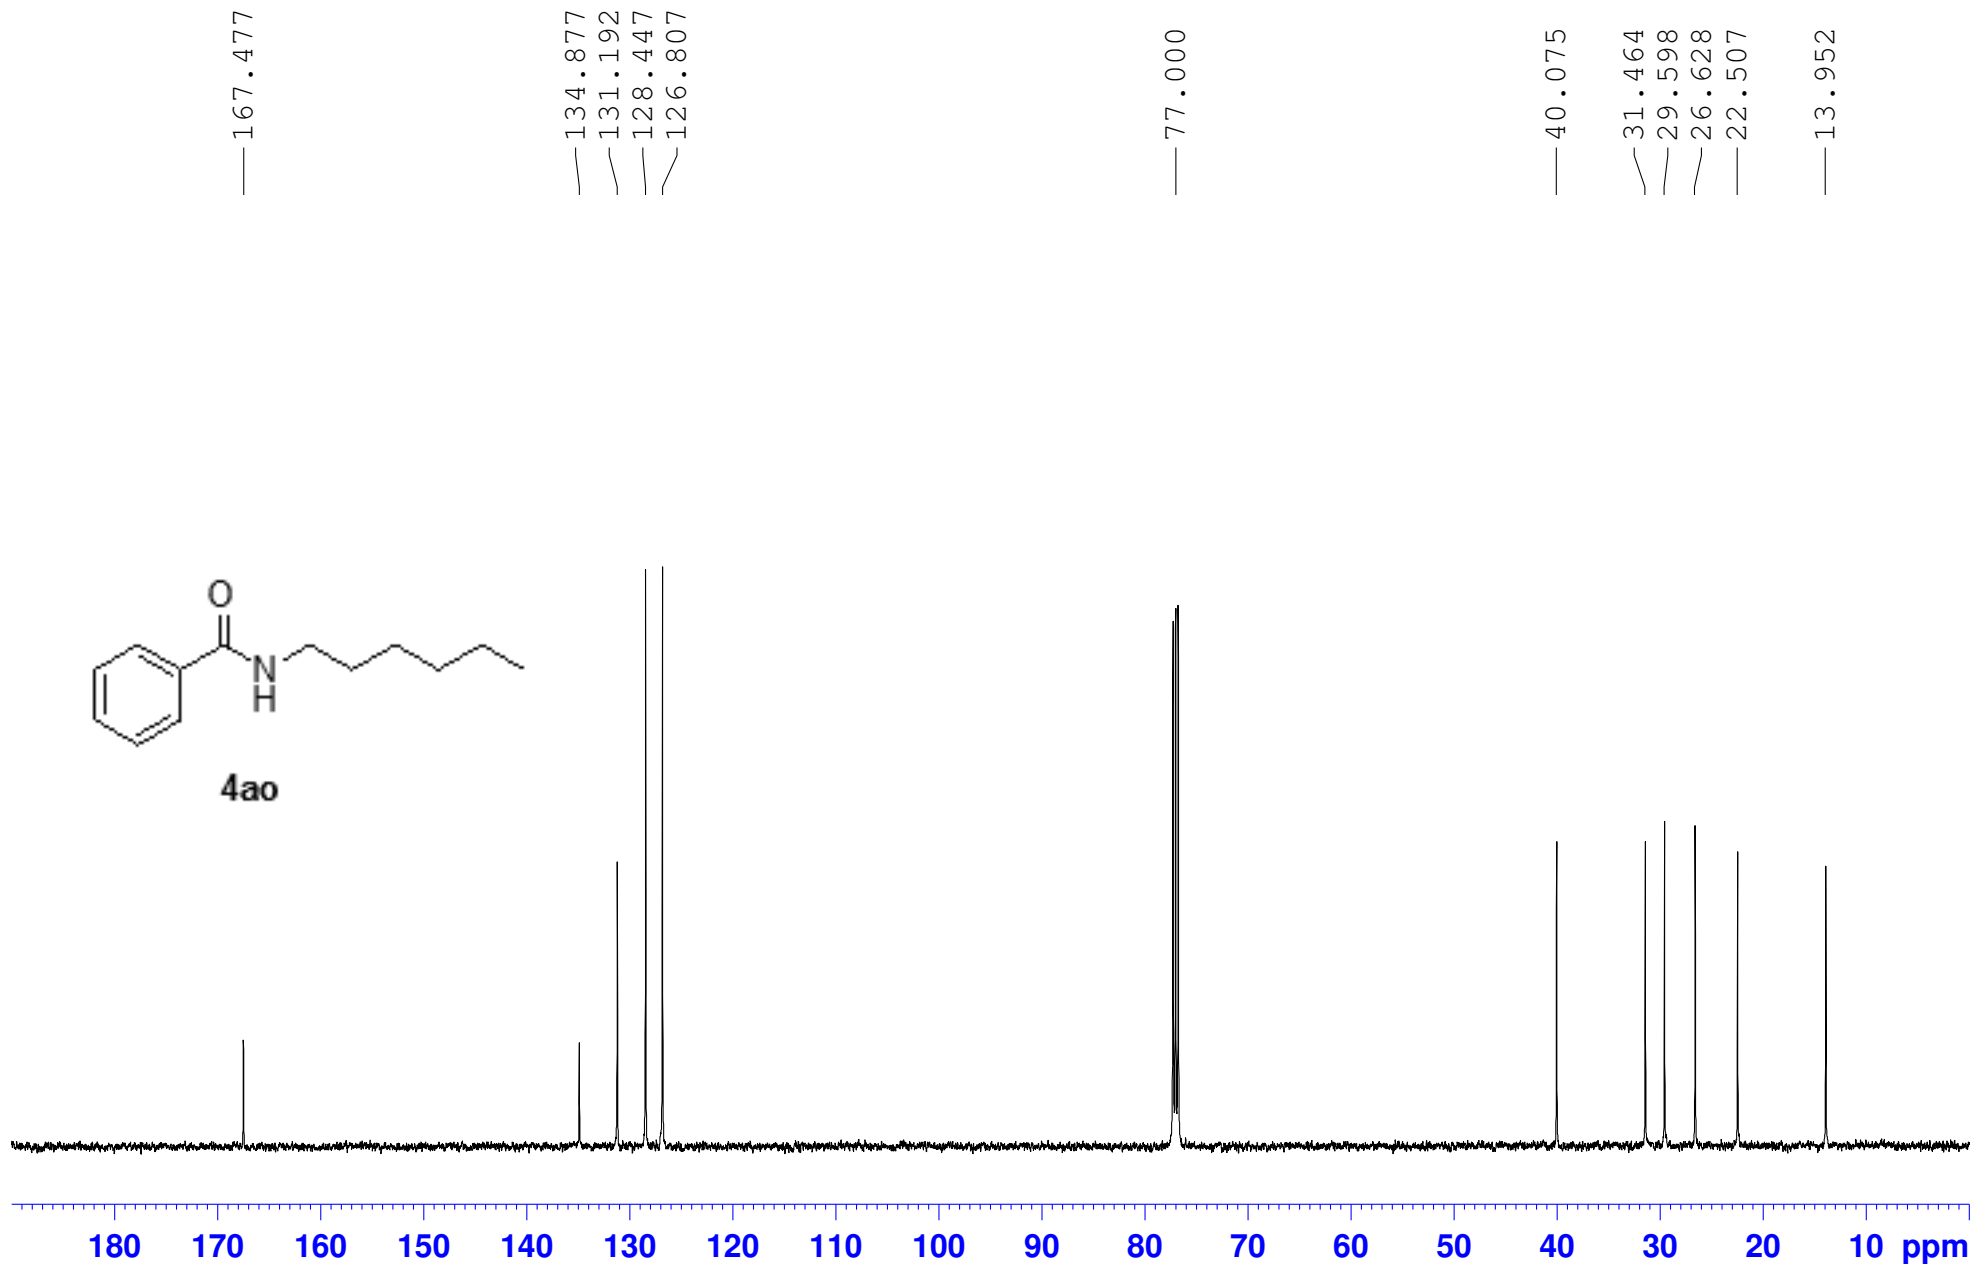

N-isopentylbenzamide  
Proton CDCl<sub>3</sub>

7.761  
7.746  
7.501  
7.487  
7.472  
7.437  
7.422  
7.407  
7.263

6.106

3.498  
3.486  
3.470  
3.457

1.732  
1.718  
1.705  
1.692  
1.678  
1.665  
1.652  
1.536  
1.522  
1.506  
1.492  
0.965  
0.952

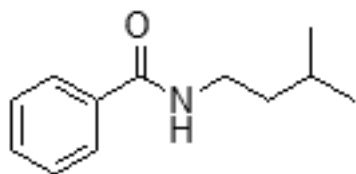

4ap

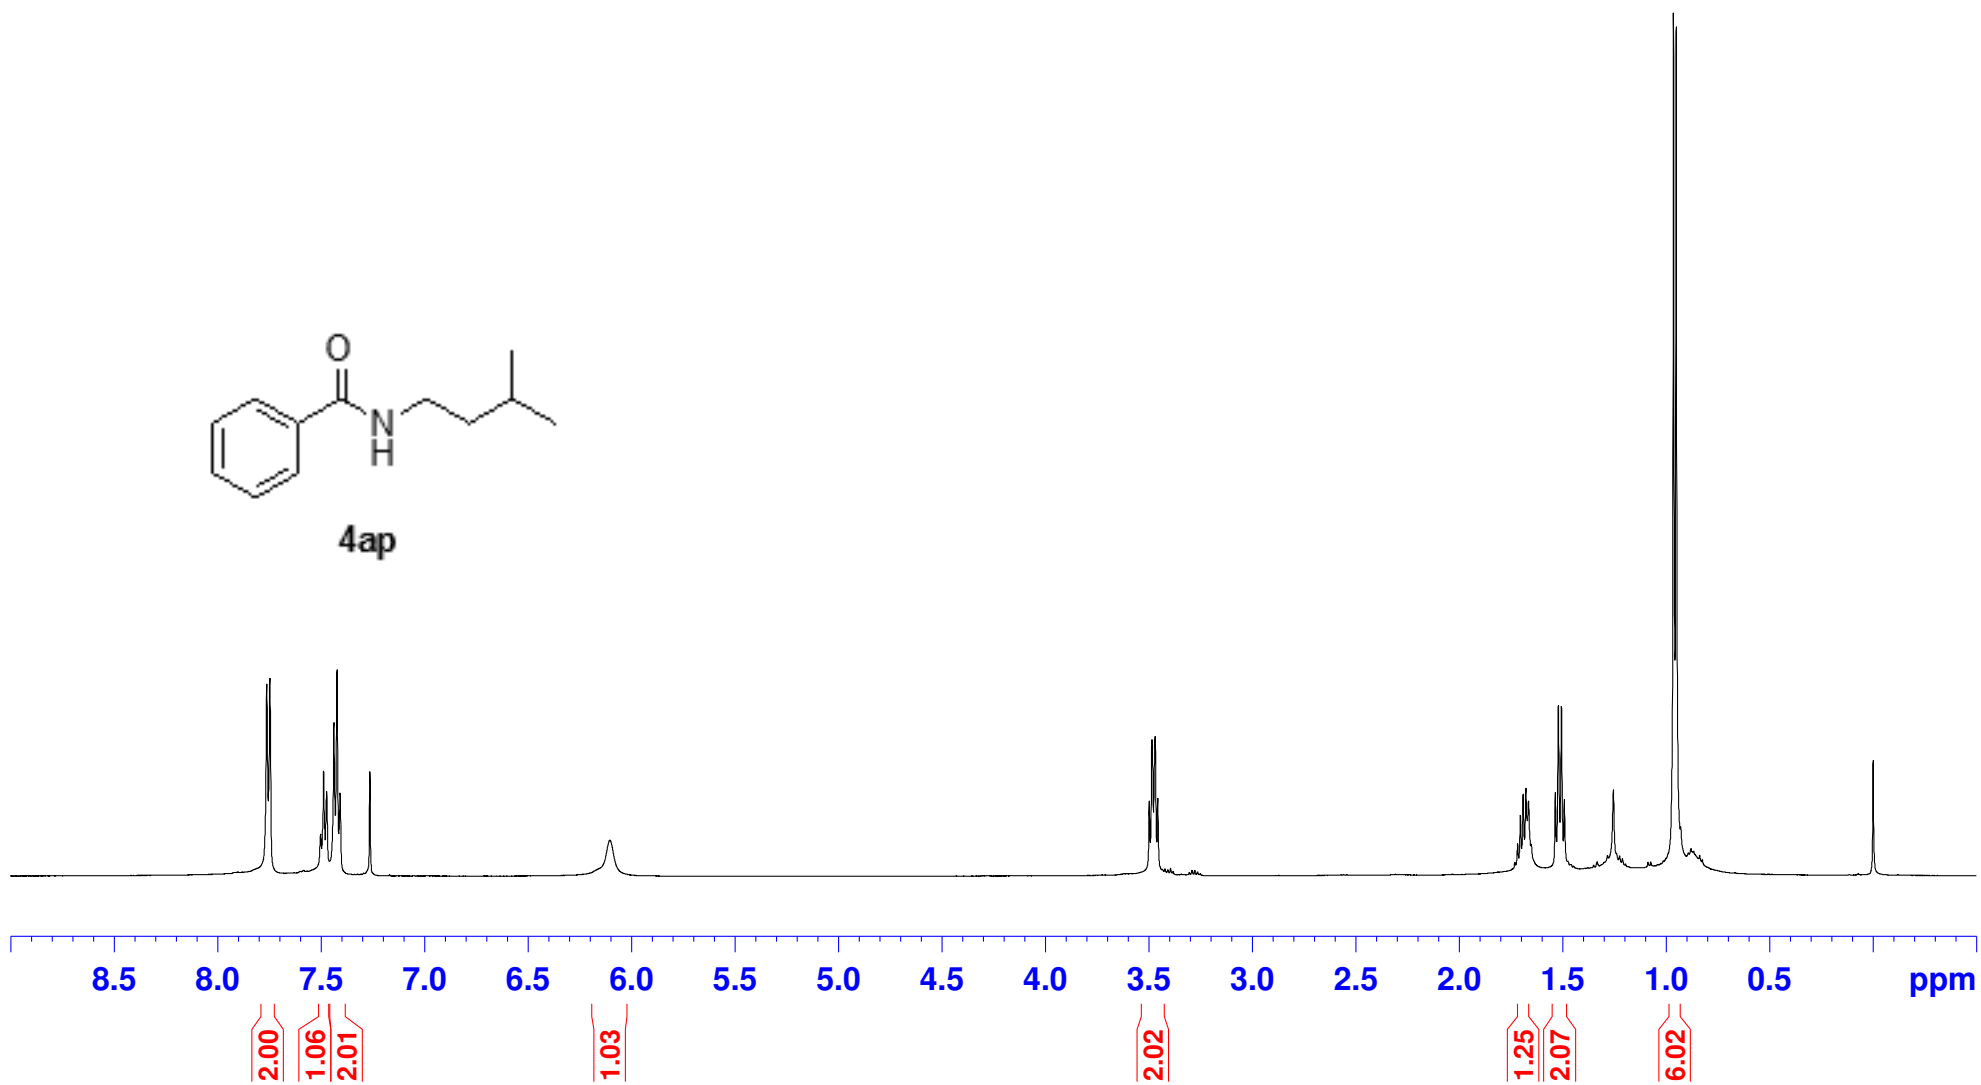



N-isopentylbenzamide  
C13CPD CDC13

— 167.476

— 134.830  
— 131.202  
— 128.444  
— 126.794

— 77.000

< 38.489  
< 38.348

— 25.919  
— 22.431

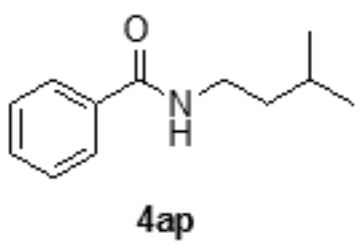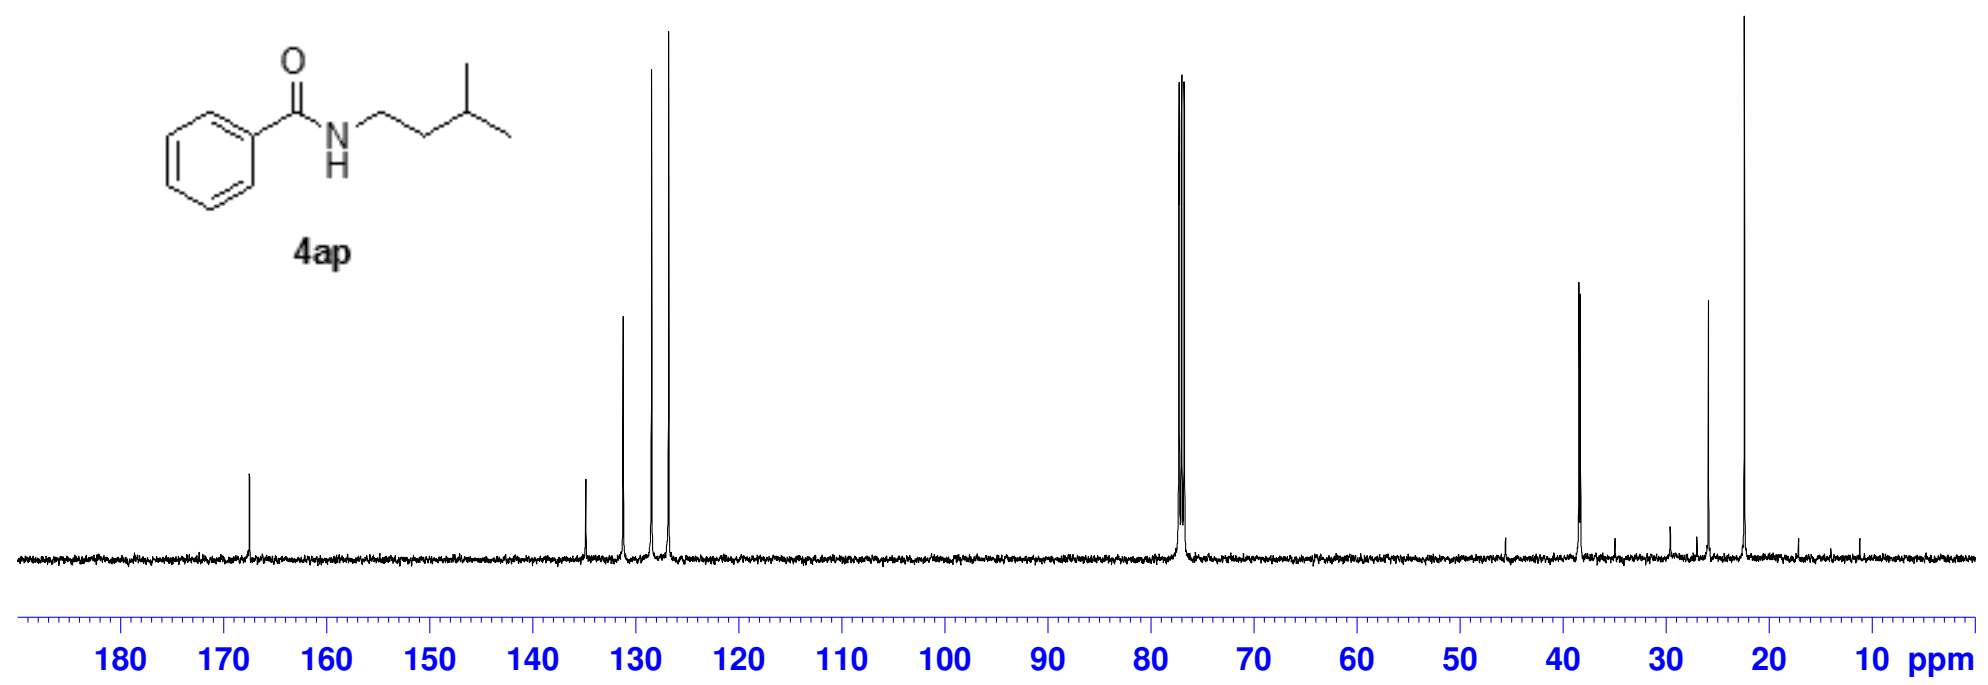

N-(cyclohexylmethyl)benzamide  
Proton CDCl<sub>3</sub>

7.772  
7.757  
7.506  
7.492  
7.477  
7.442  
7.428  
7.413  
7.265

— 6.217

3.316  
3.304  
3.291  
1.799  
1.769  
1.730  
1.694  
1.667  
1.596  
1.589  
1.583  
1.575  
1.286  
1.262  
1.237  
1.210  
1.184  
1.160  
1.135  
1.034  
1.010  
0.986  
0.963

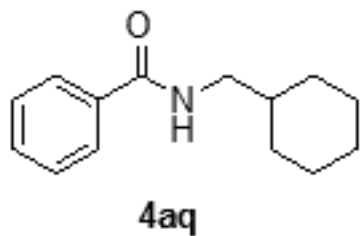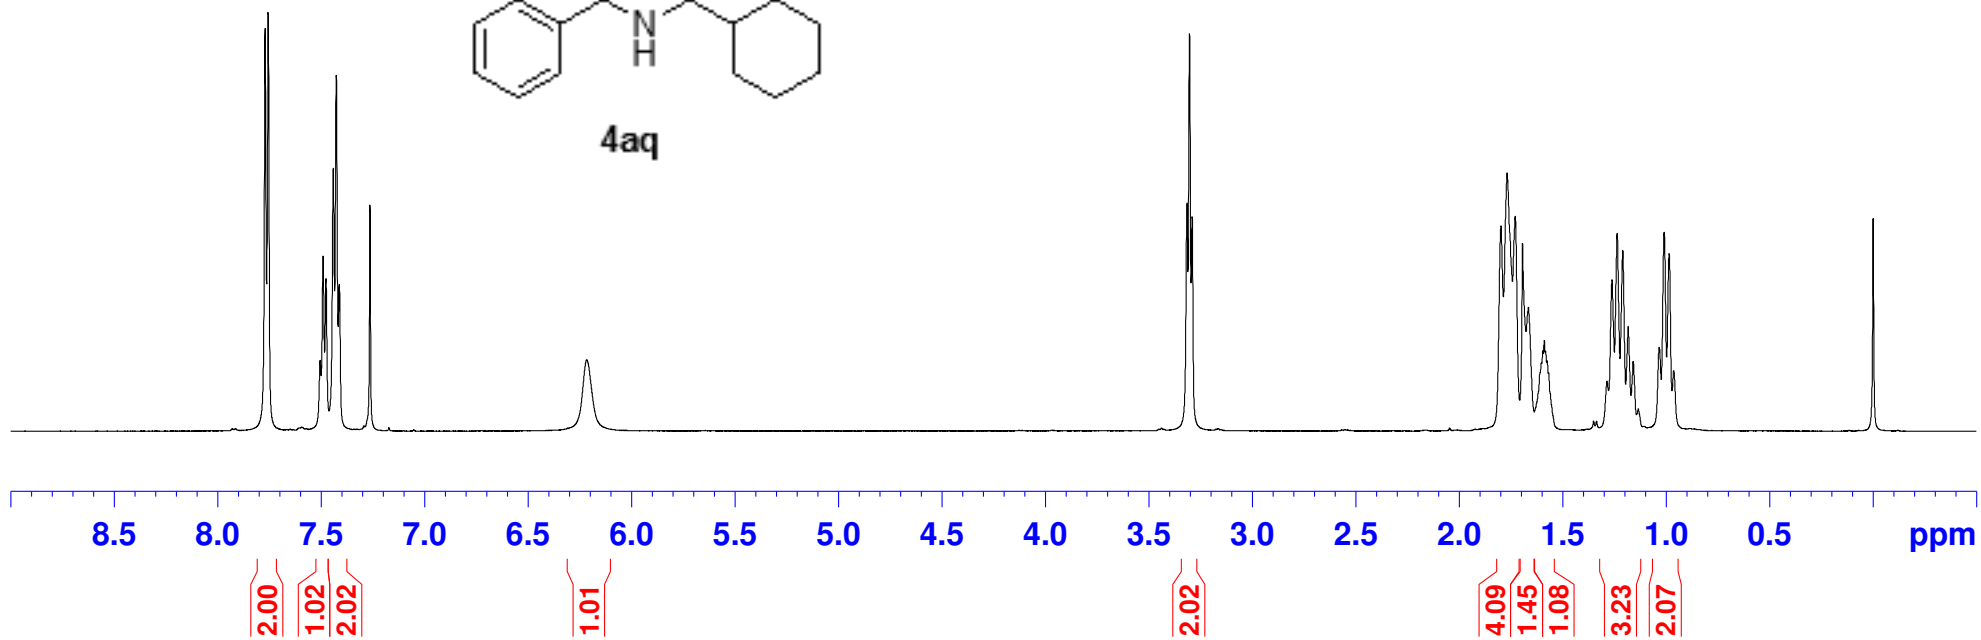

N-(cyclohexylmethyl)benzamide  
C13CPD CDC13

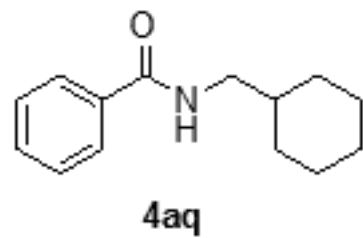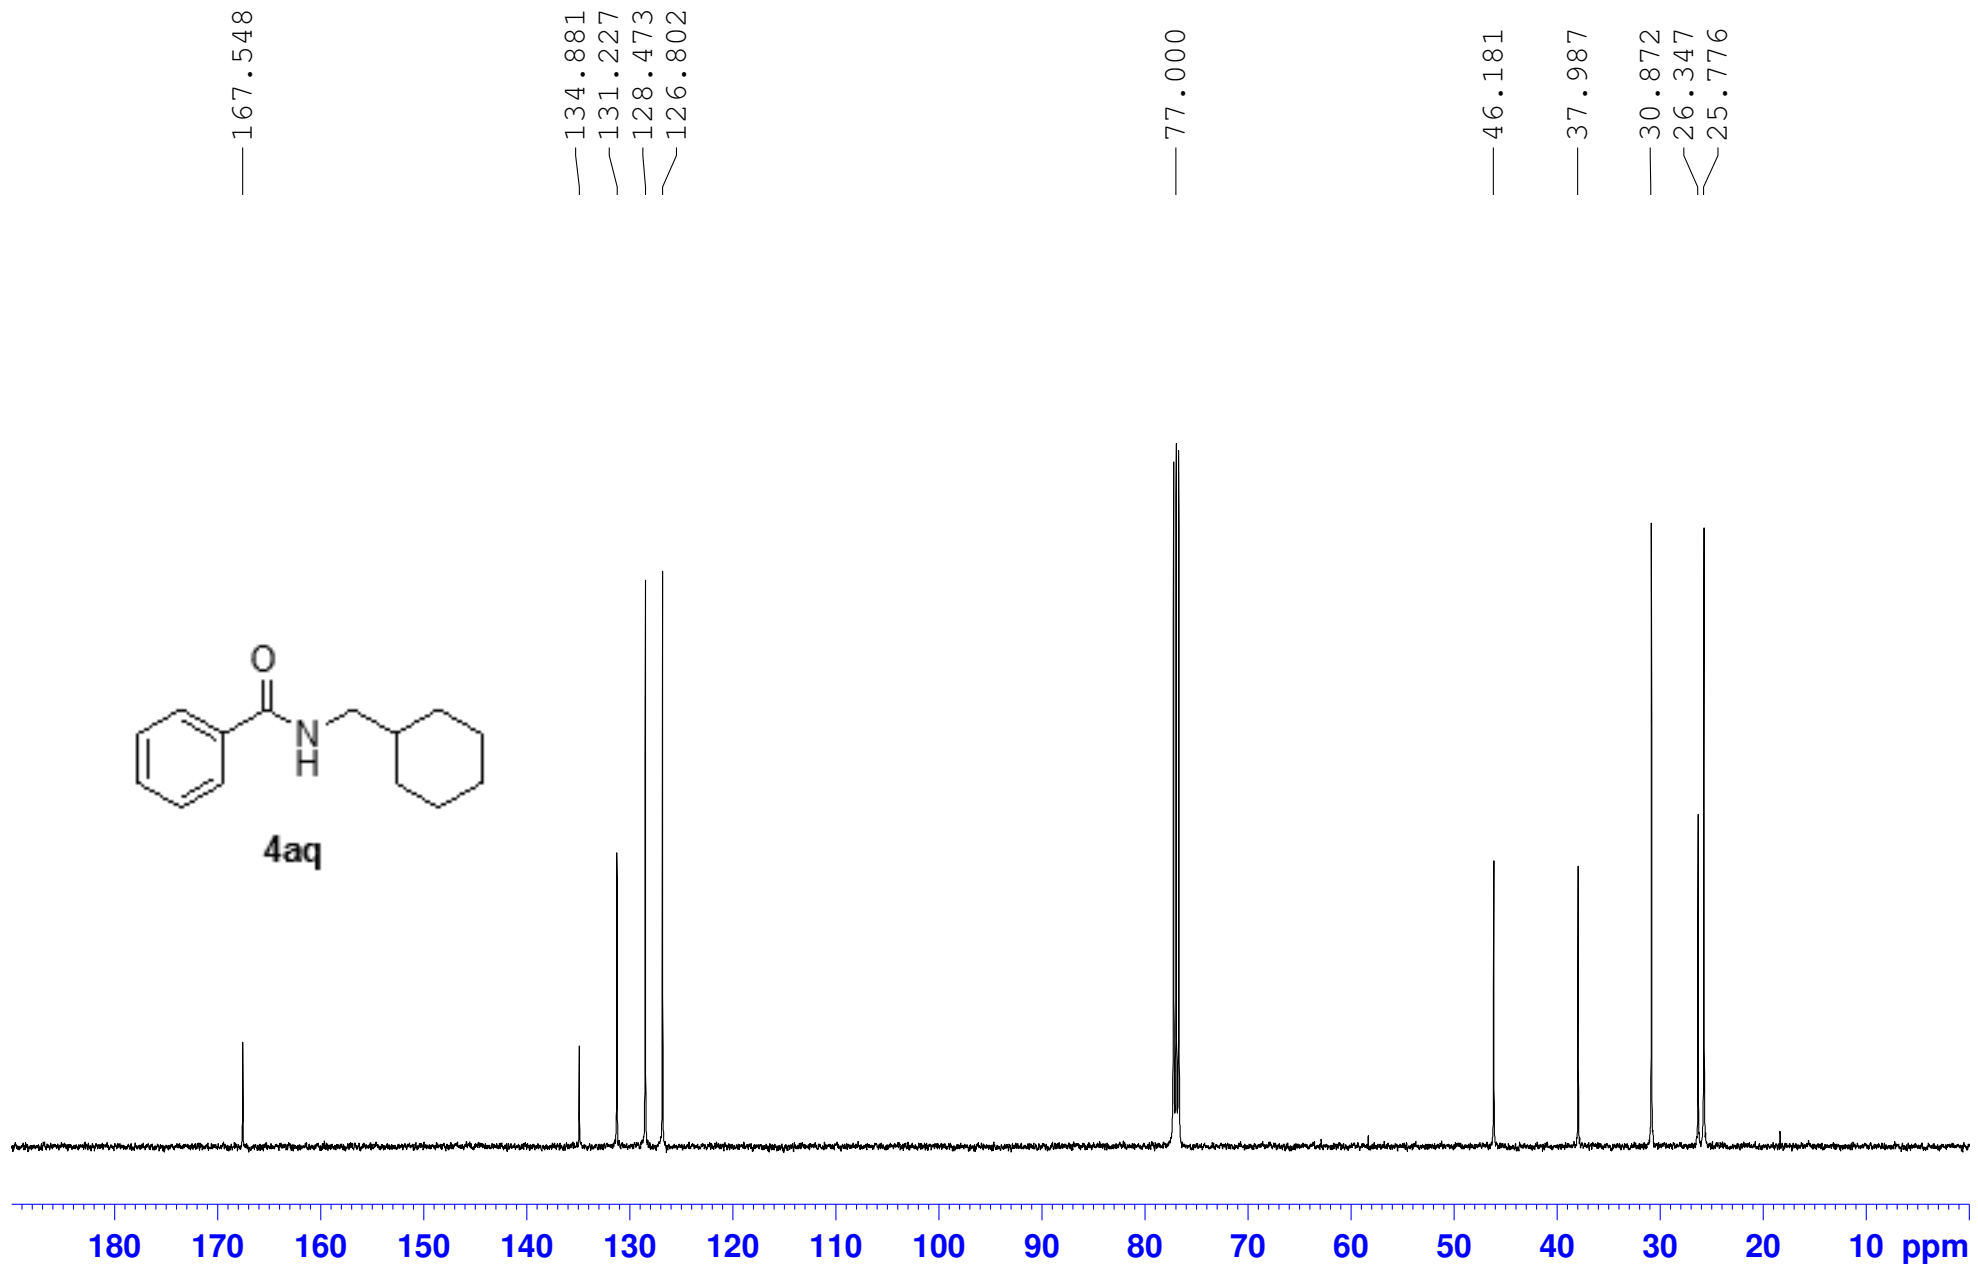

N,N'-m-xylylene-bis-benzamide  
Proton DMSO-d6

7.871  
7.856  
7.540  
7.526  
7.512  
7.464  
7.449  
7.434  
7.285  
7.267  
7.203  
7.189

4.471  
4.460

2.500

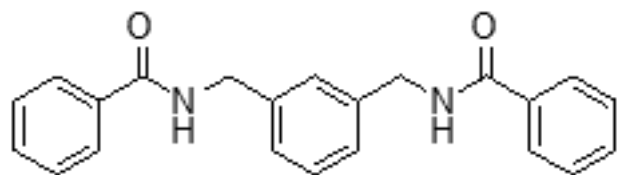

4ar

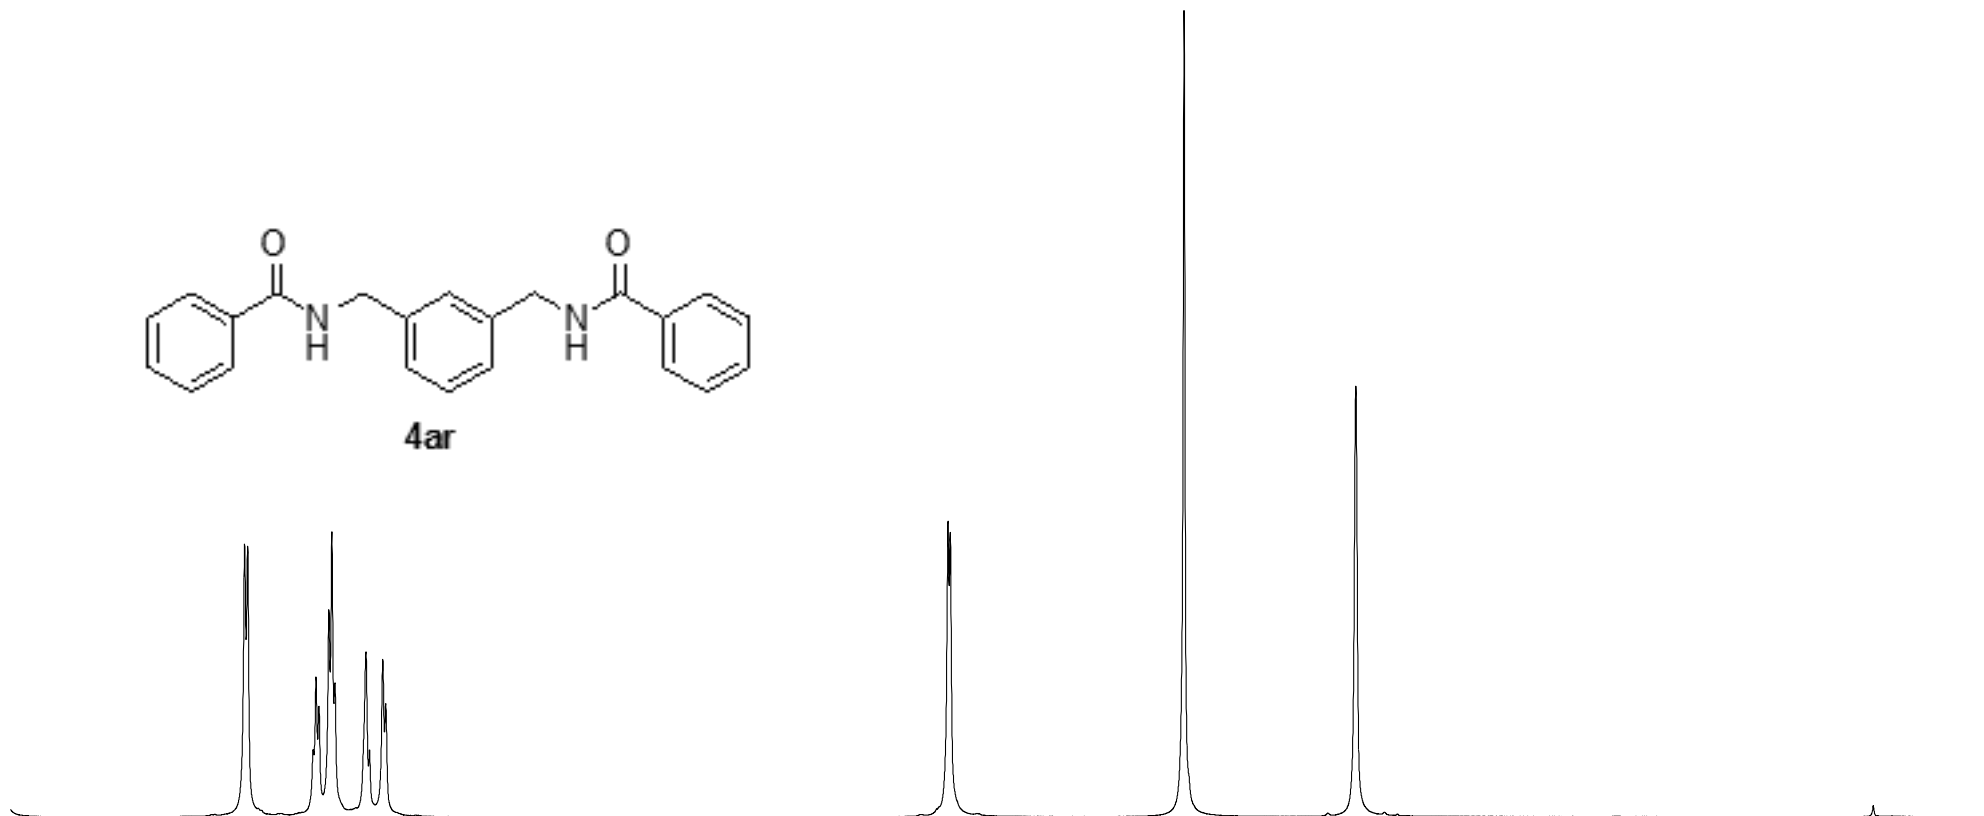

8.5 8.0 7.5 7.0 6.5 6.0 5.5 5.0 4.5 4.0 3.5 3.0 2.5 2.0 1.5 1.0 0.5 ppm

4.05  
2.03  
4.08  
2.02  
2.02

4.08

N,N'-m-xylene-bis-benzamide  
C13CPD DMSO-d6

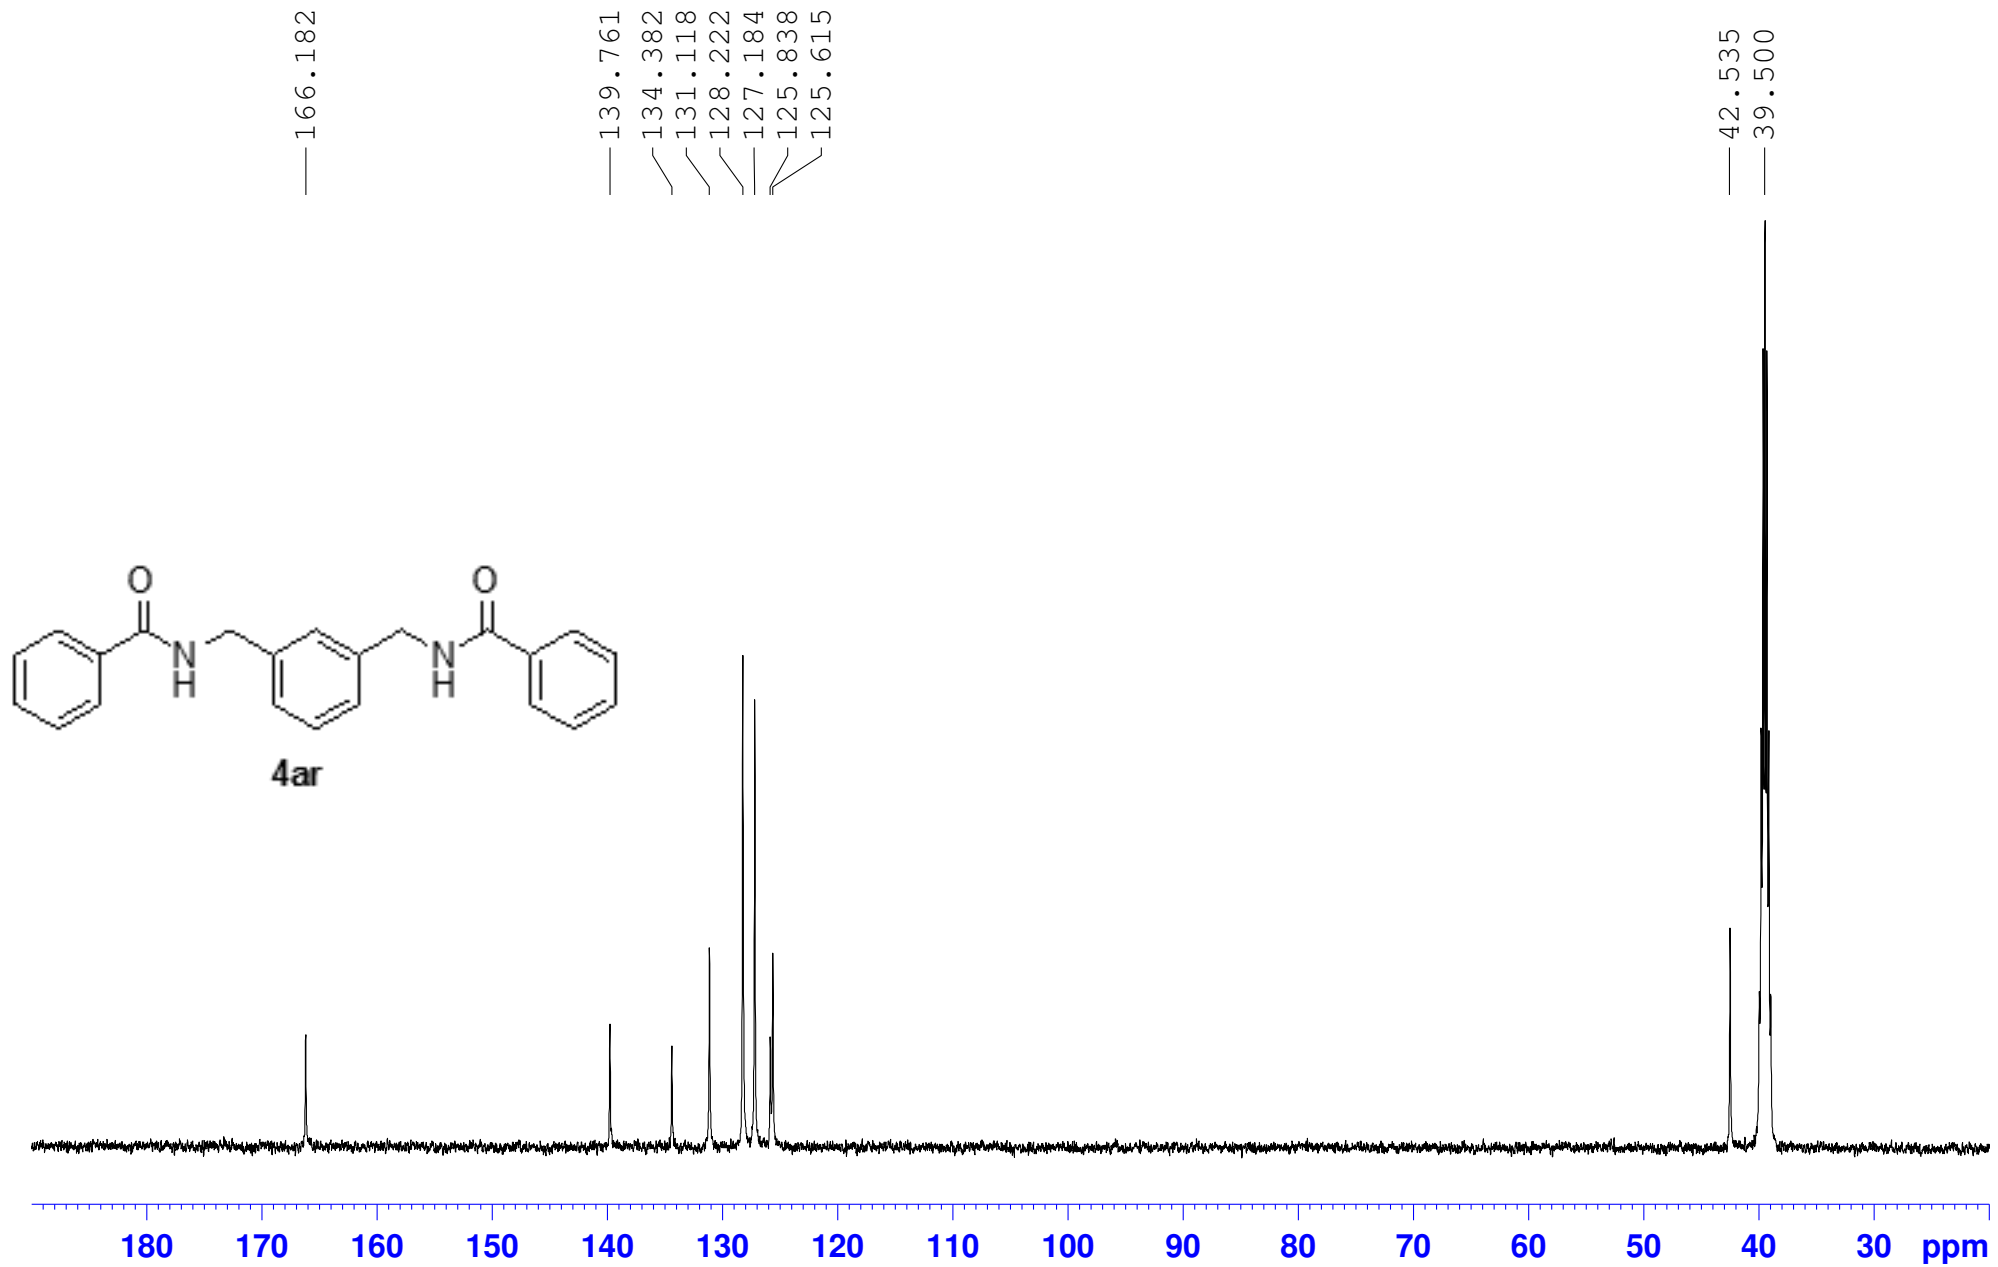

N-benzyl-4-fluorobenzamide  
Proton CDCl<sub>3</sub>

7.812  
7.802  
7.795  
7.784  
7.376  
7.360  
7.354  
7.349  
7.330  
7.319  
7.313  
7.305  
7.302  
7.285  
7.259  
7.115  
7.098  
7.081  
6.382

4.637  
4.626

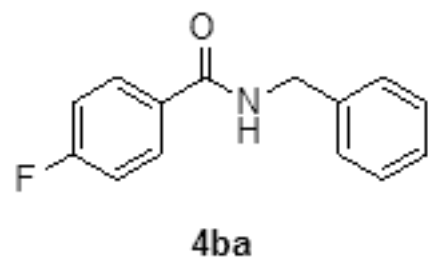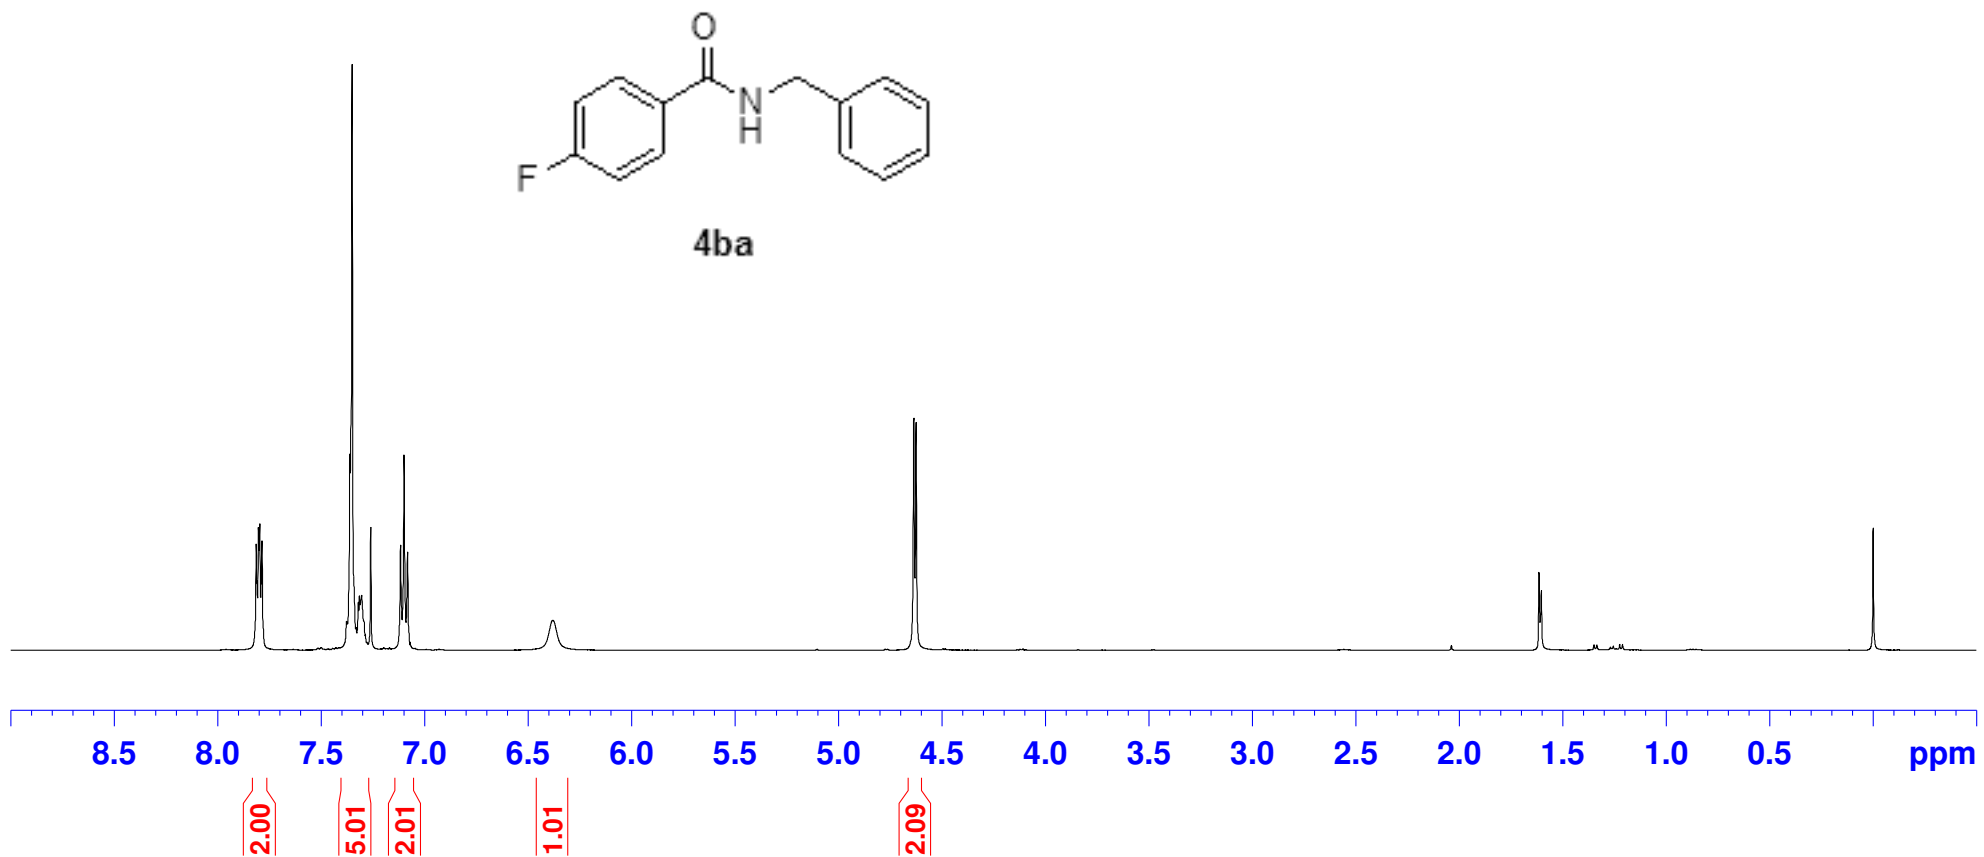

N-benzyl-4-fluorobenzamide  
C13CPD CDC13

166.320  
165.713  
163.705

138.056  
130.516  
129.322  
129.250  
128.755  
127.843  
127.618  
115.632  
115.459

77.000

44.141

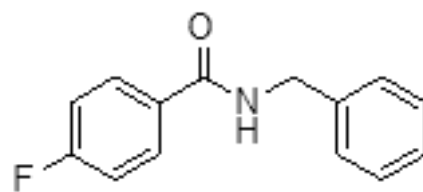

4ba

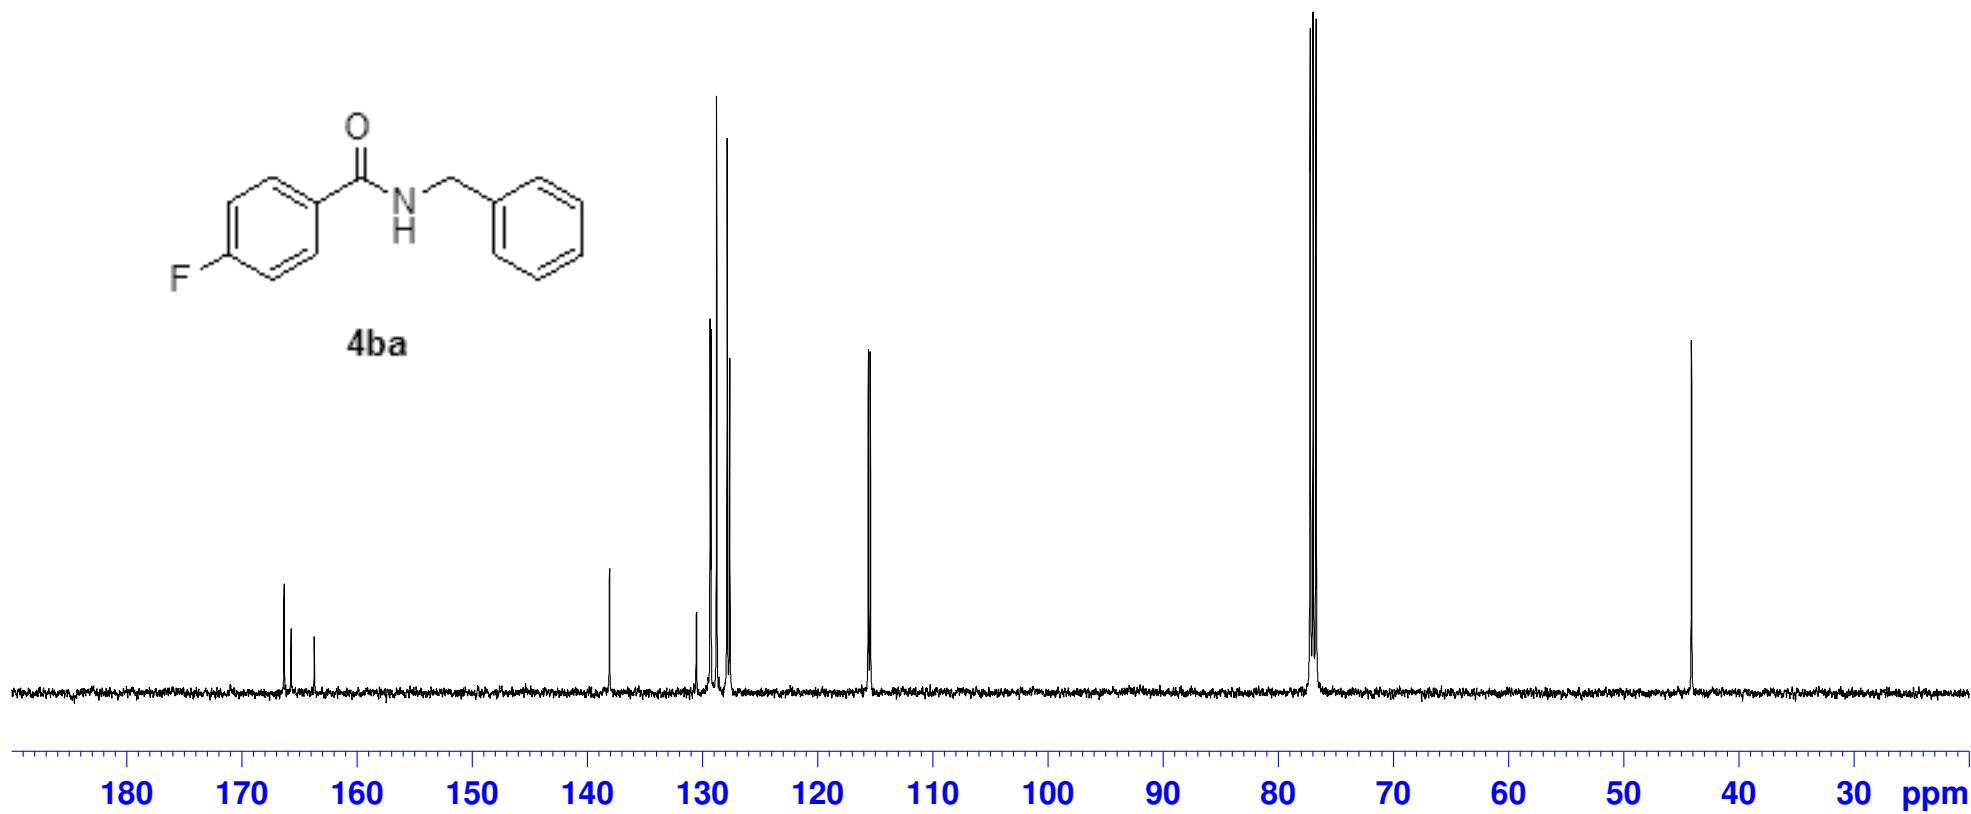

N-benzyl-4-chlorobenzamide  
Proton CDCl<sub>3</sub>

7.733  
7.717  
7.404  
7.388  
7.377  
7.359  
7.348  
7.317  
7.304  
7.258

6.395

4.635  
4.624

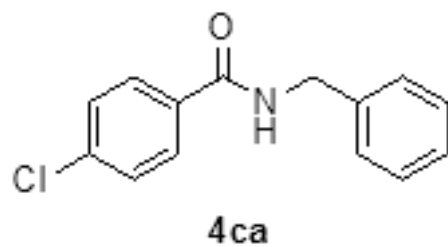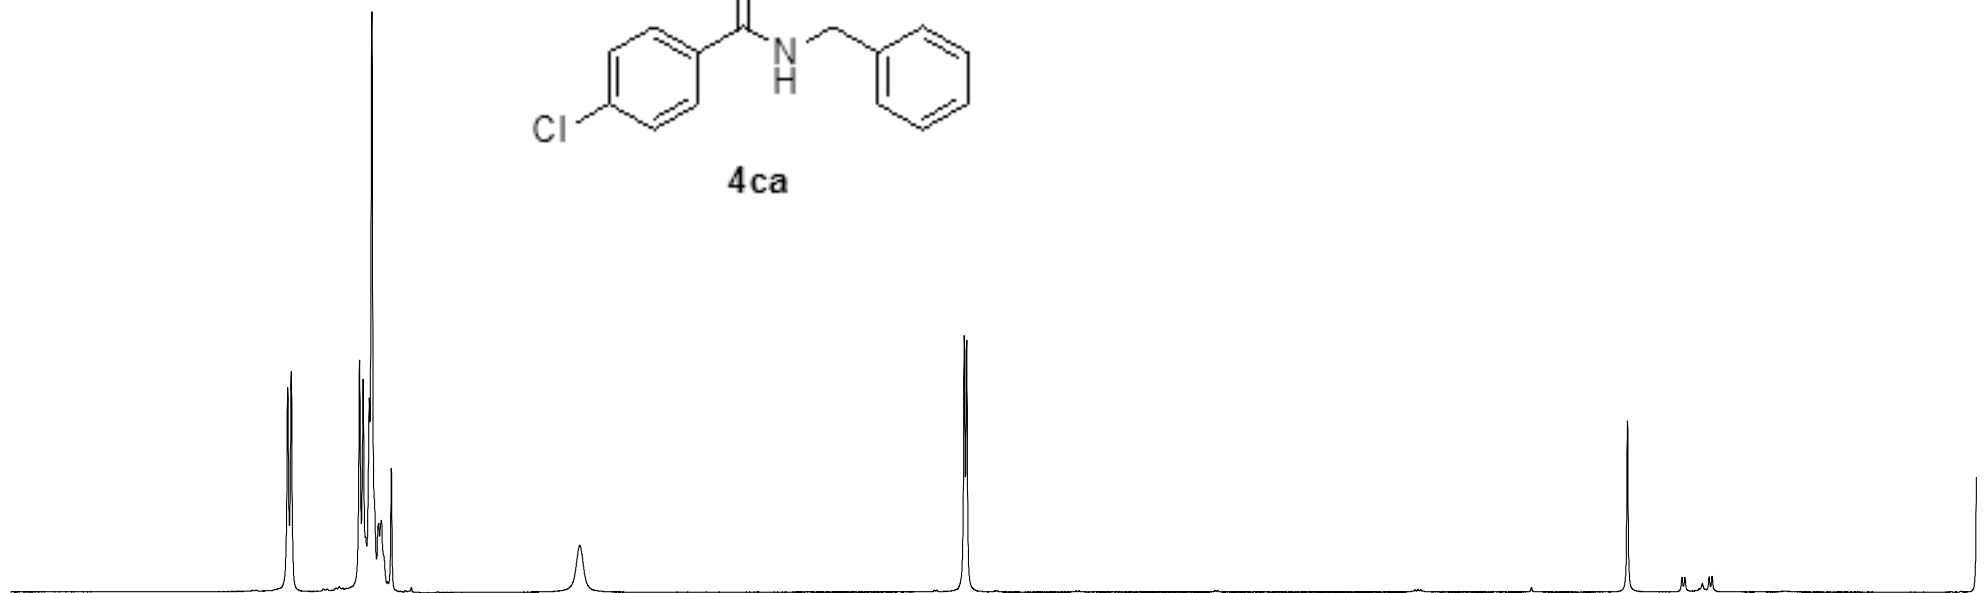

8.5 8.0 7.5 7.0 6.5 6.0 5.5 5.0 4.5 4.0 3.5 3.0 2.5 2.0 1.5 1.0 0.5 ppm

2.00  
2.00  
5.02

1.05

2.07



N-benzyl-4-chlorobenzamide  
C13CPD CDC13

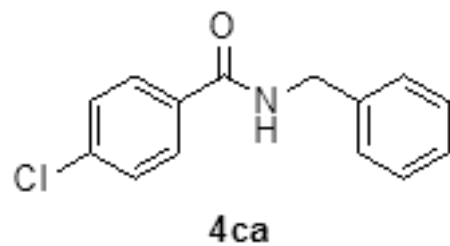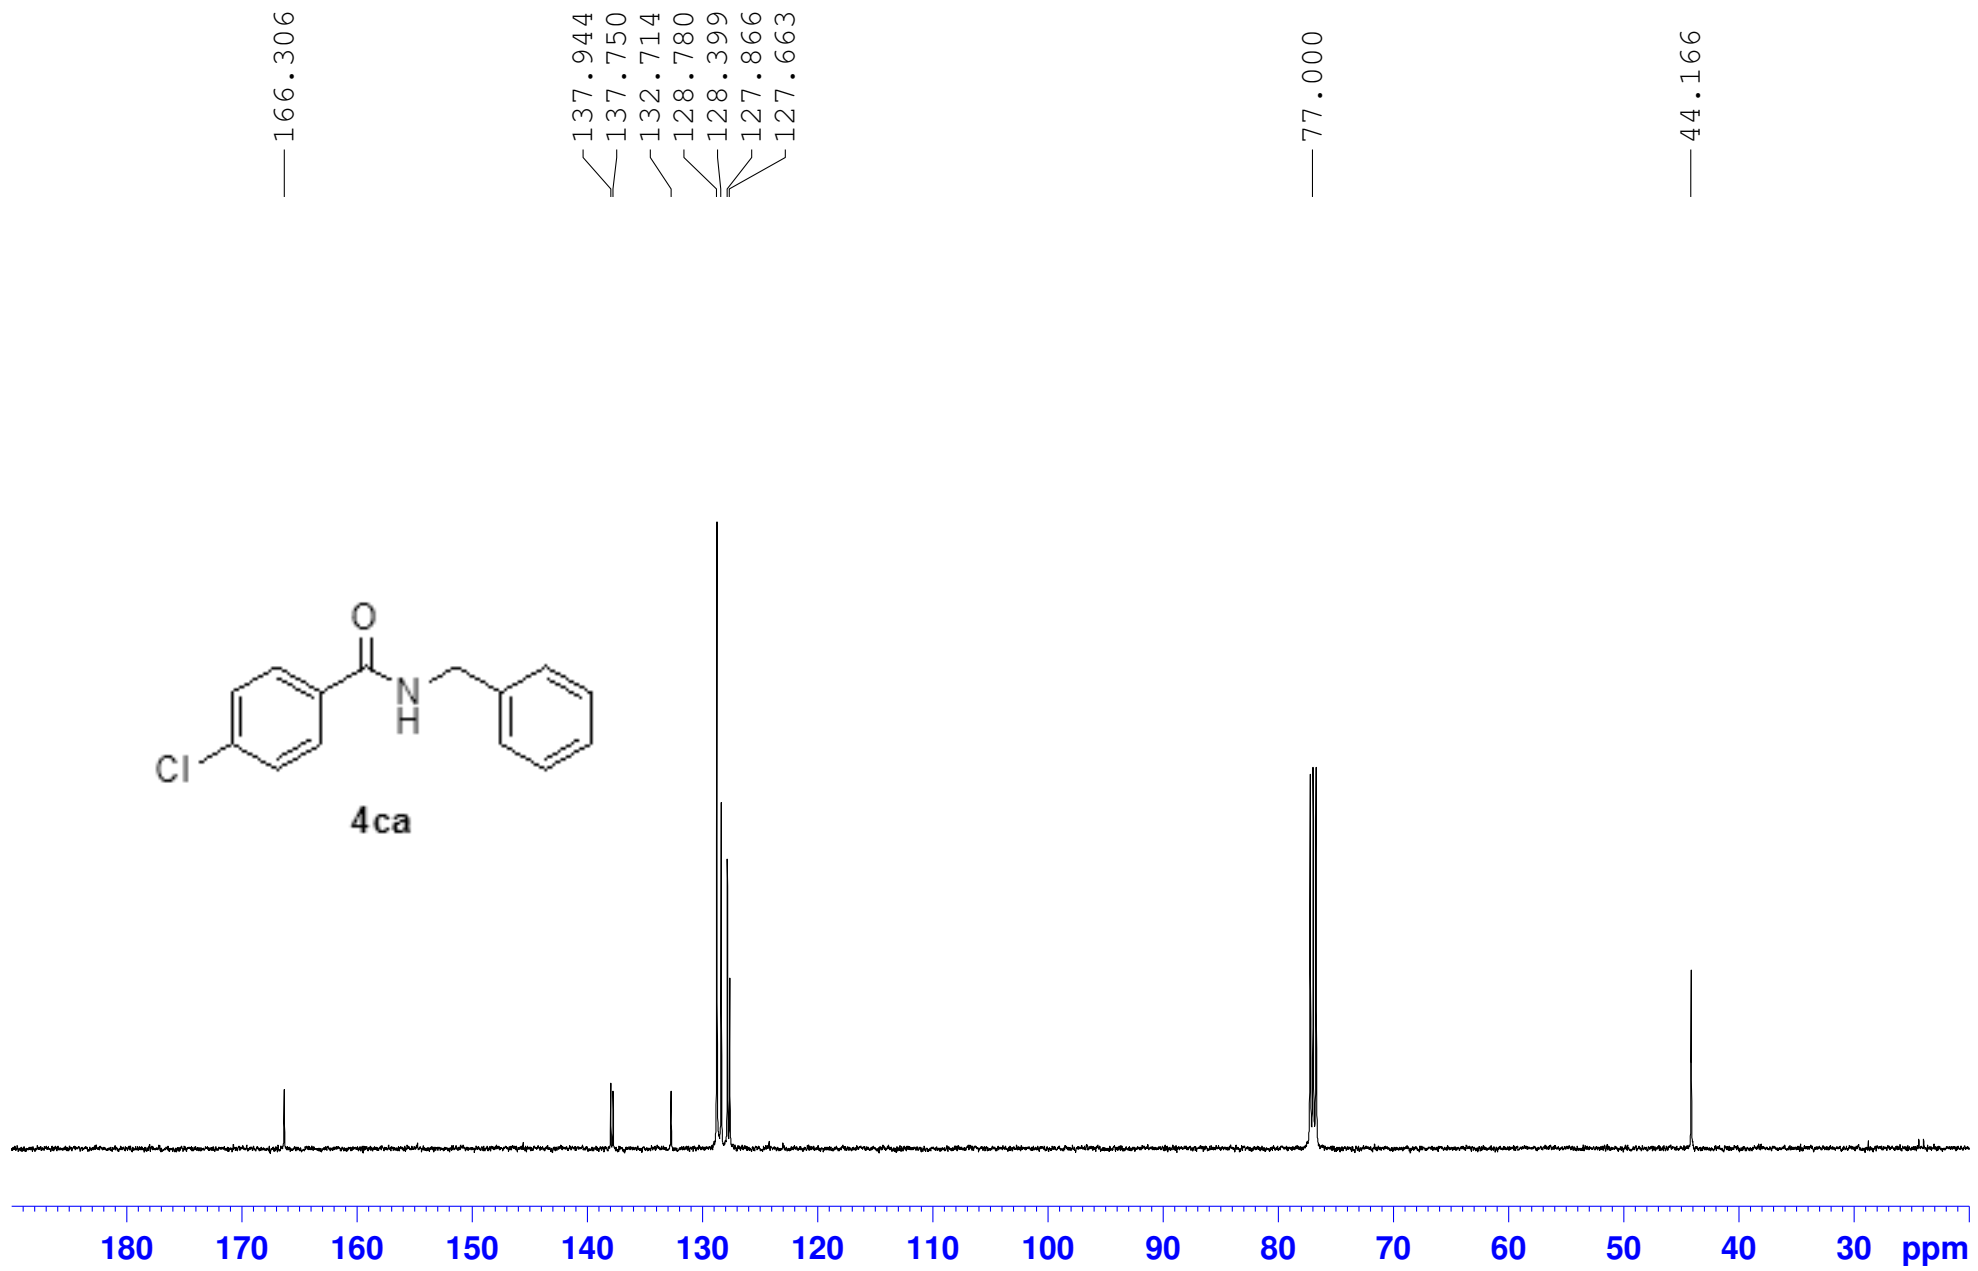

N-benzyl-3,4-dichlorobenzamide  
Proton CDCl<sub>3</sub>

7.885  
7.613  
7.597  
7.505  
7.489  
7.366  
7.351  
7.345  
7.330  
7.315  
7.262  
— 6.448

4.625  
4.614

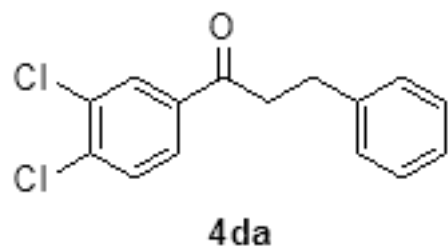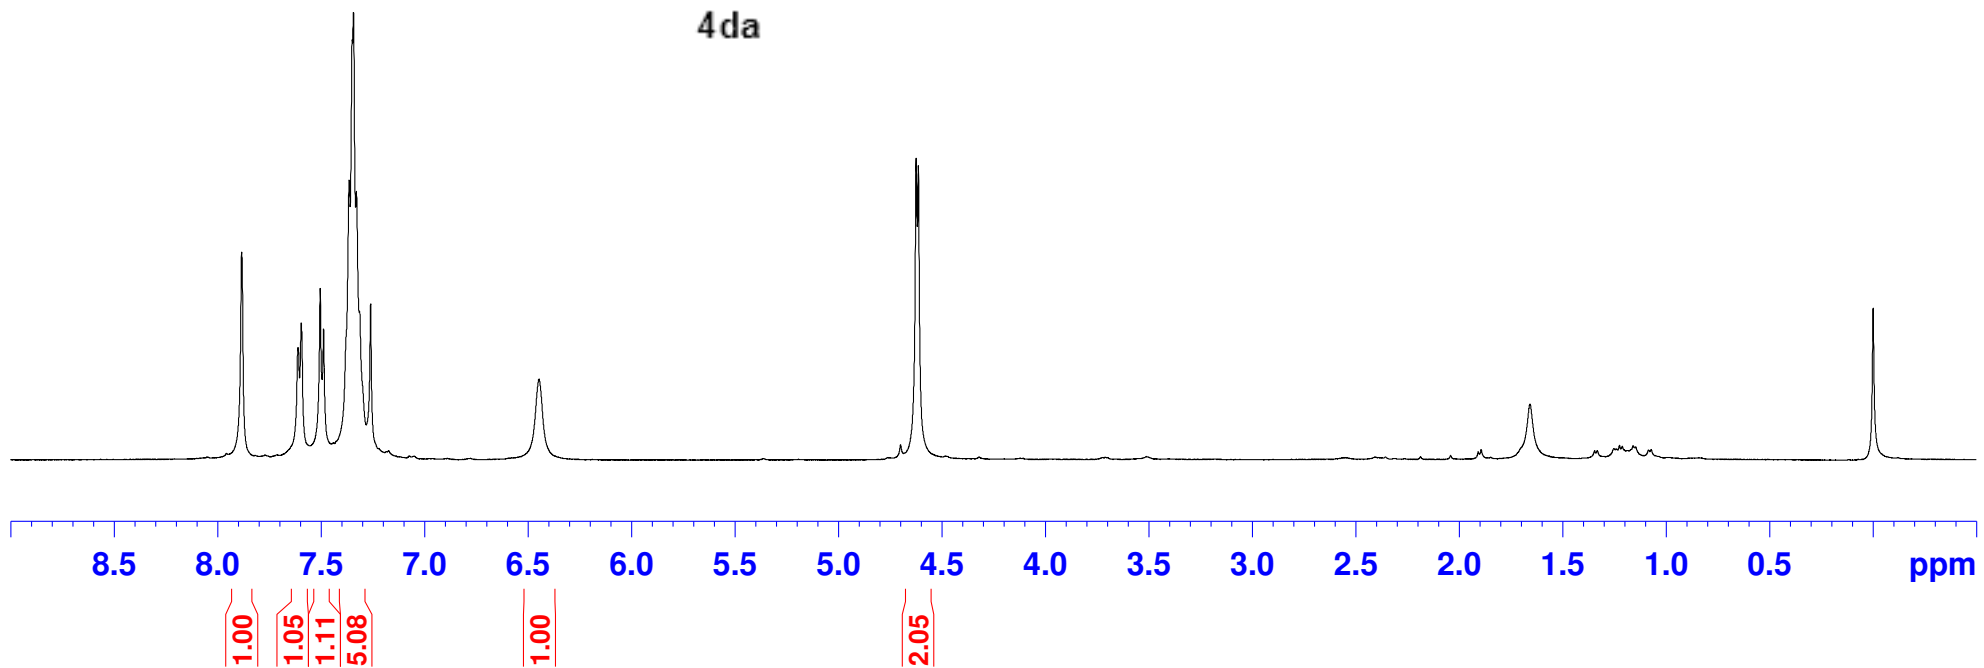

N-benzyl-3,4-dichlorobenzamide  
C13CPD CDCl3

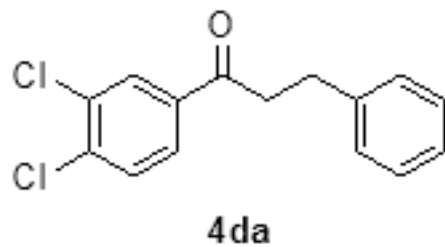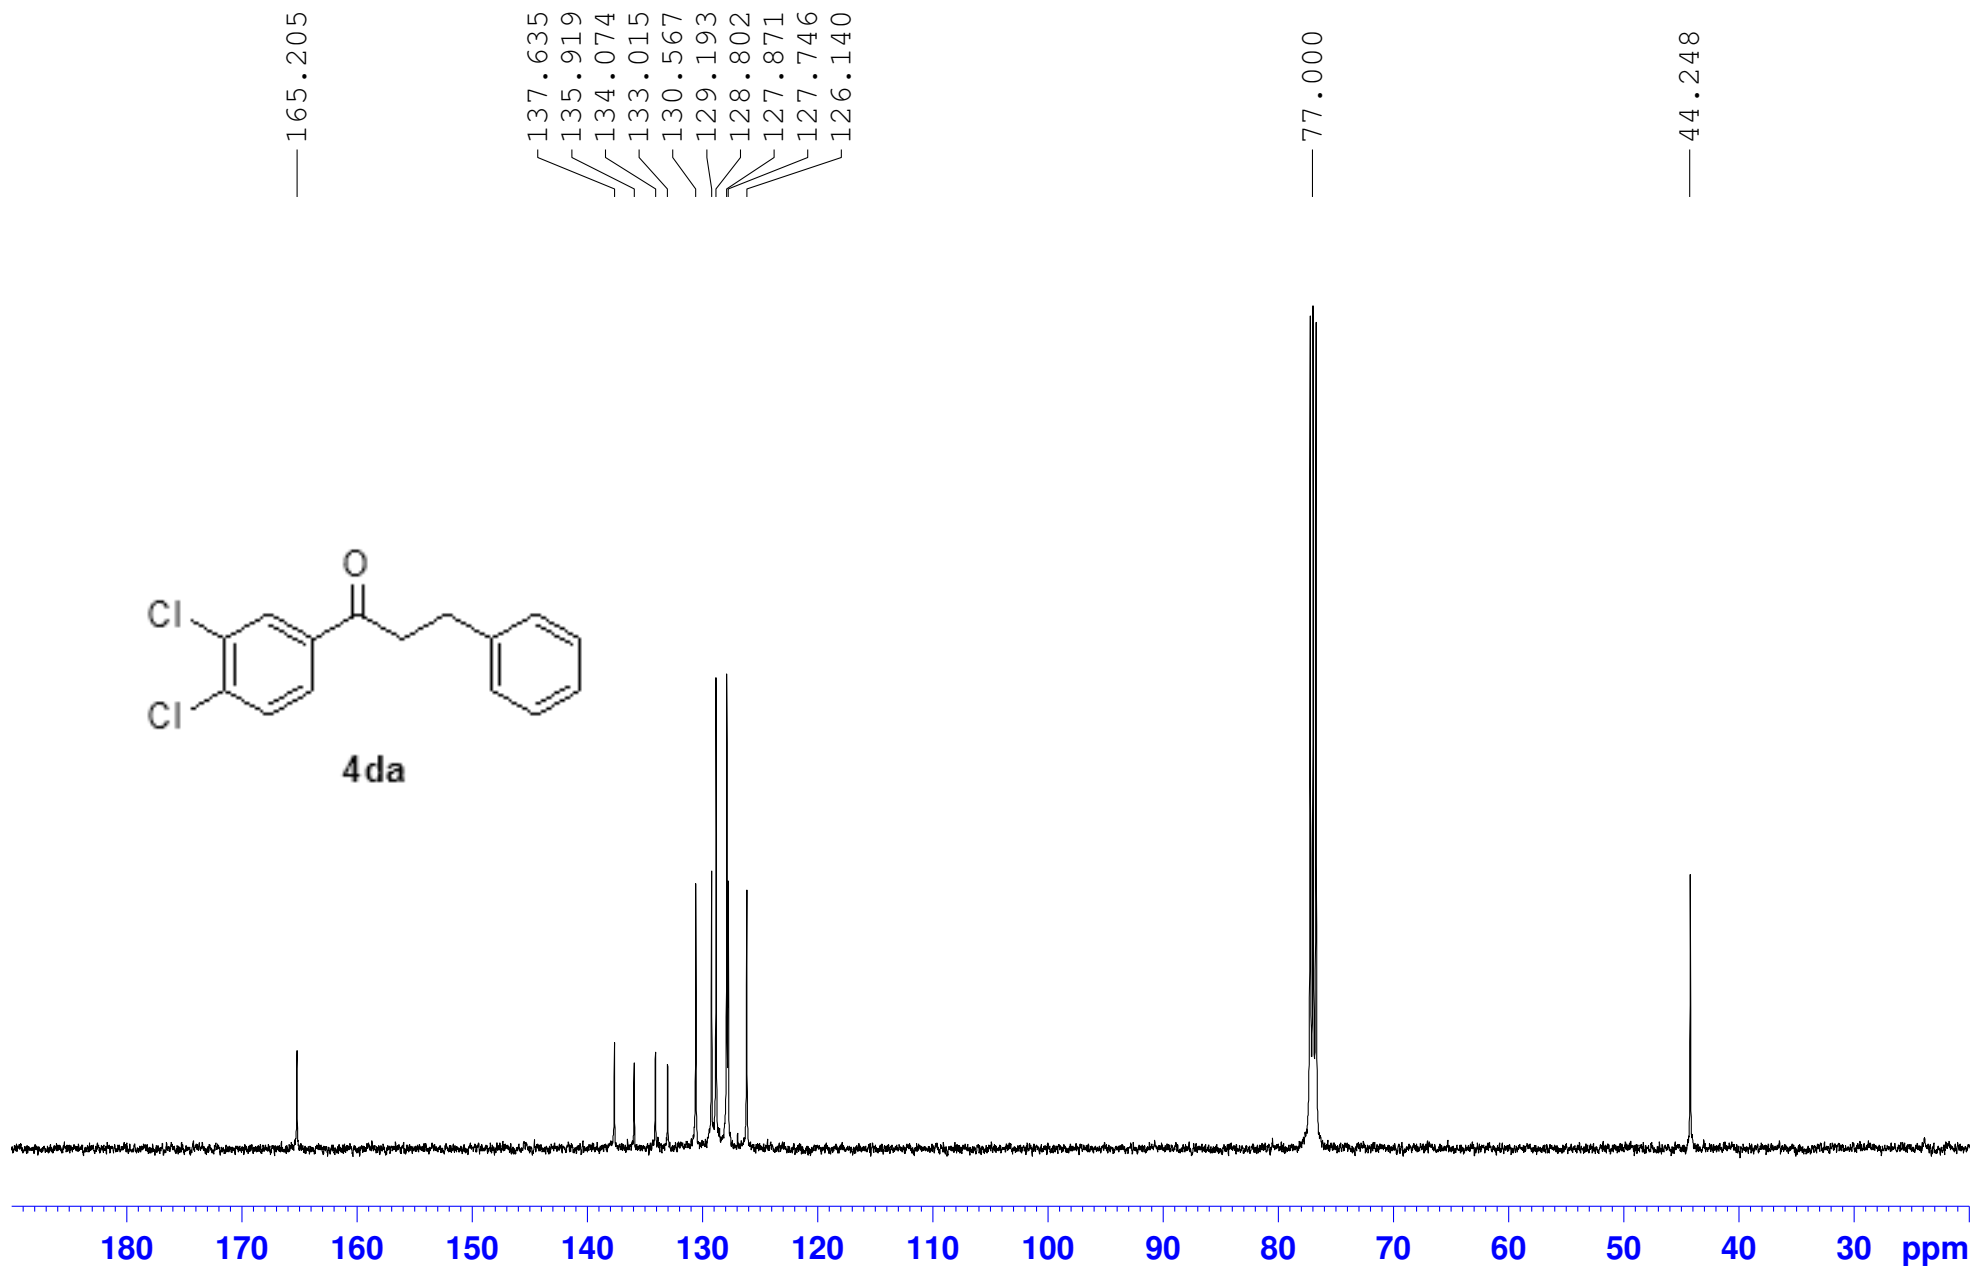

N-benzyl-3-bromobenzamide  
PROTON CDC13

7.928  
7.712  
7.697  
7.635  
7.634  
7.619  
7.618  
7.382  
7.367  
7.354  
7.341  
7.326  
7.319  
7.309  
7.304  
7.288  
7.261  
6.402

4.639  
4.628

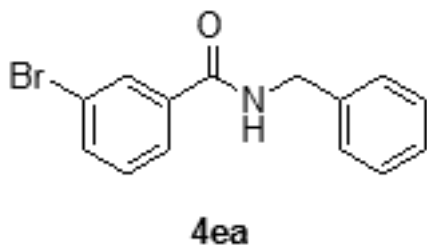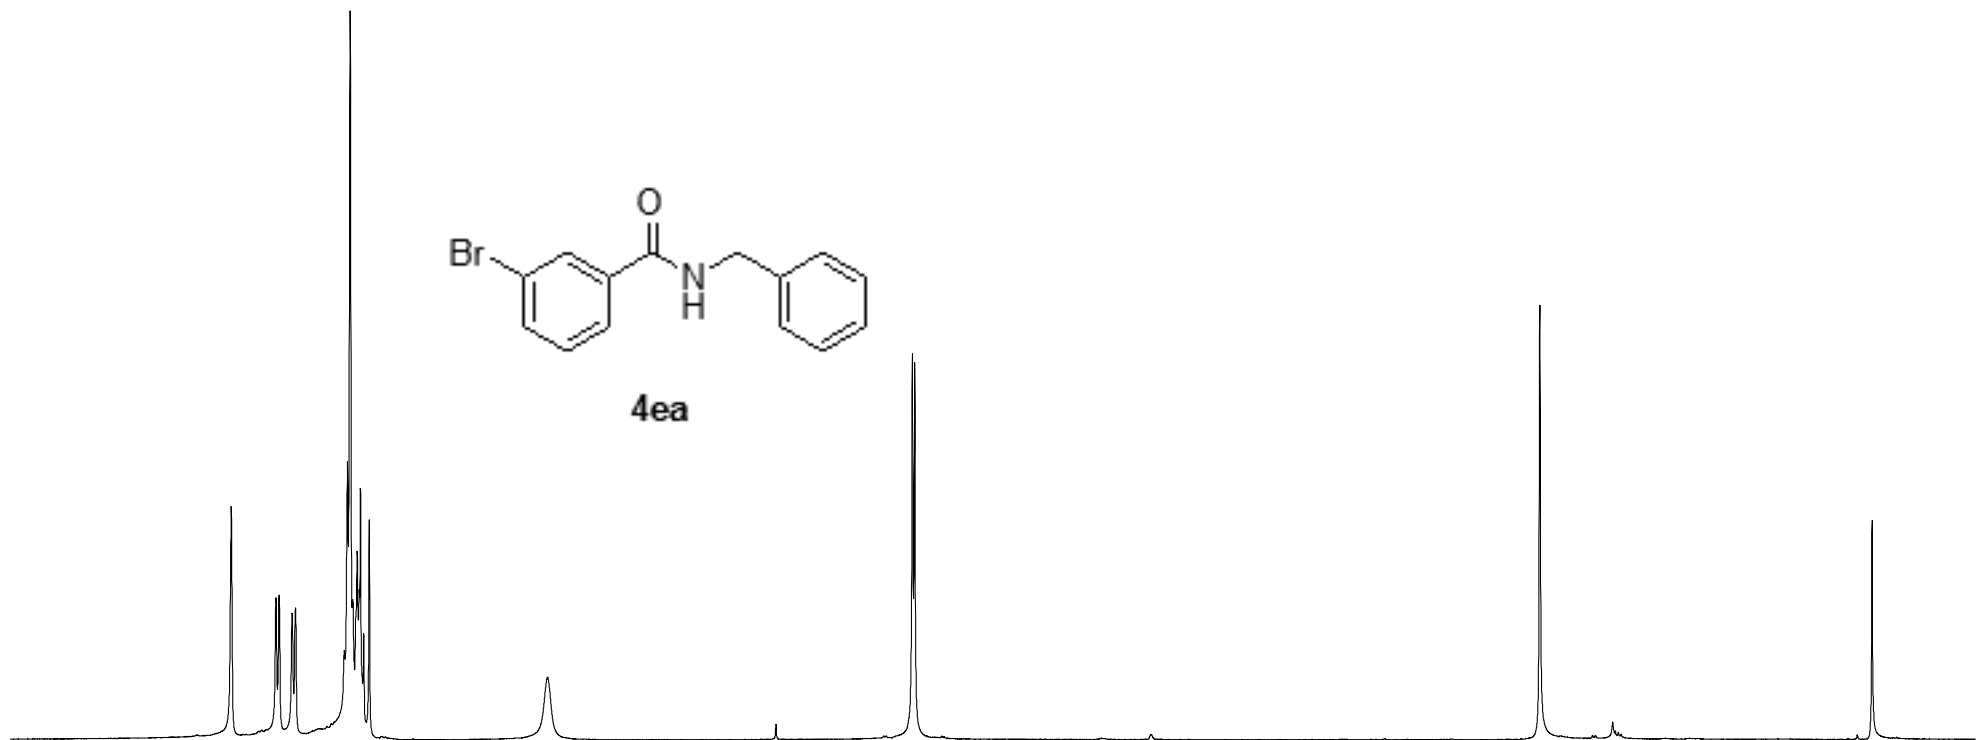

8.5 8.0 7.5 7.0 6.5 6.0 5.5 5.0 4.5 4.0 3.5 3.0 2.5 2.0 1.5 1.0 0.5 ppm

1.00  
1.00  
1.00  
6.00

1.00

2.00

N-benzyl-3-bromobenzamide  
C13CPD CDC13

— 165.921

137.827  
136.344  
134.453  
130.192  
130.126  
128.785  
127.886  
127.680  
125.548  
122.731

— 77.003

— 44.211

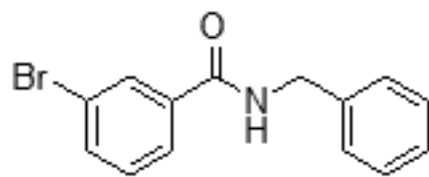

4ea

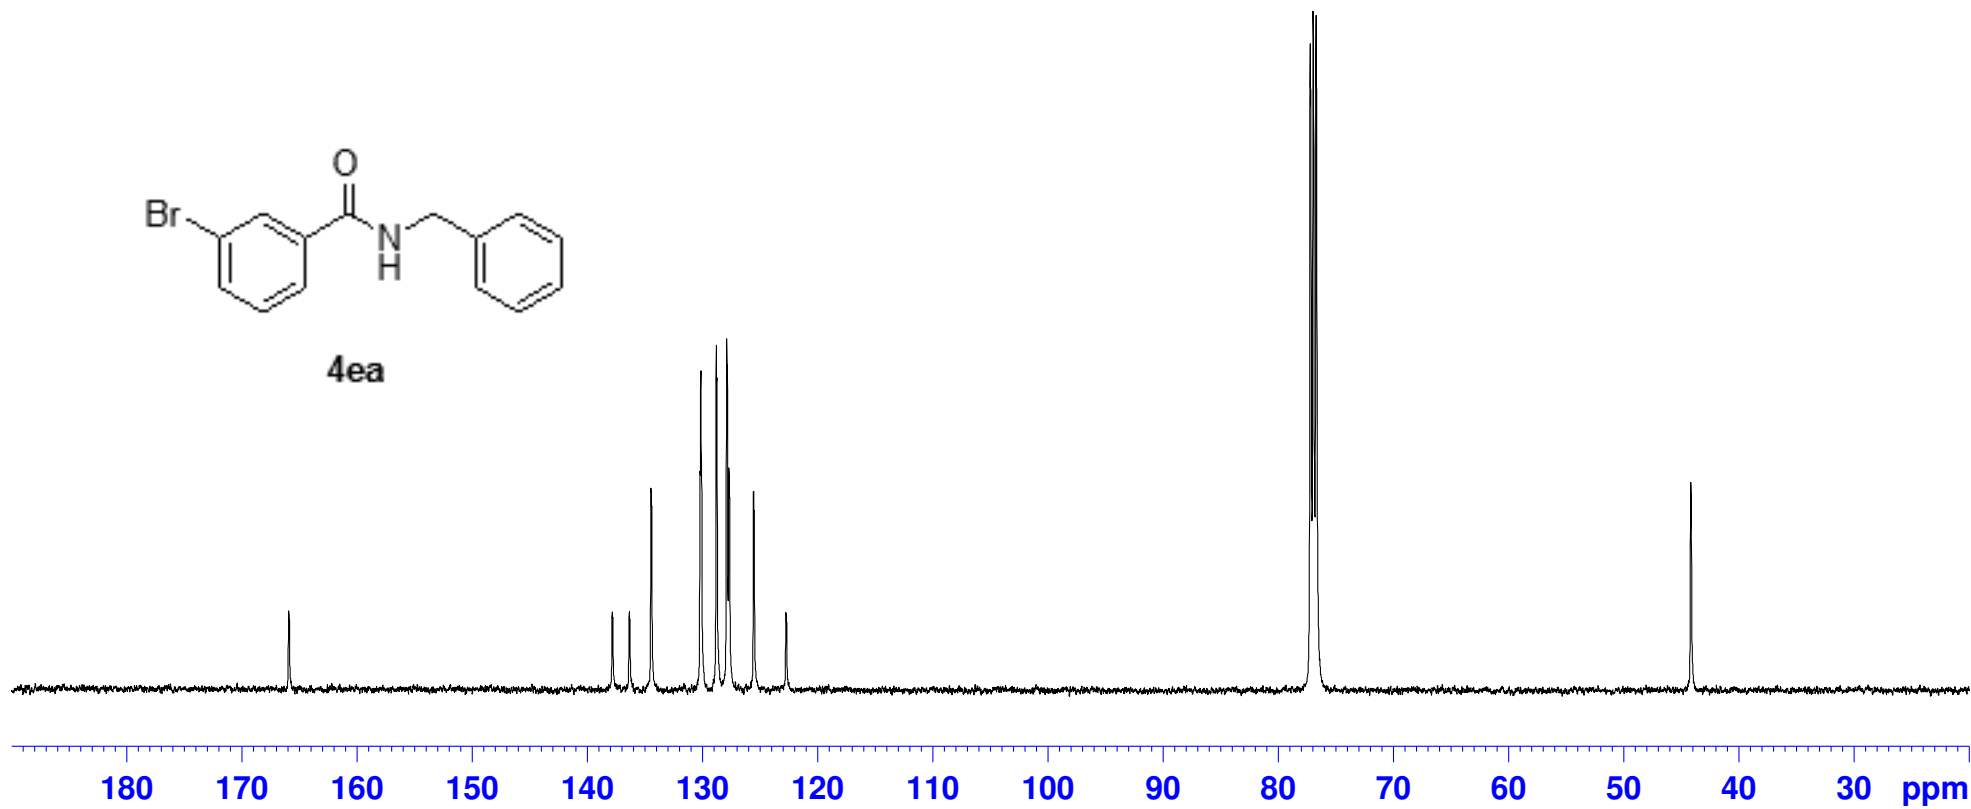

N-benzyl-4-bromobenzamide  
Proton CDCl<sub>3</sub>

7.665  
7.649  
7.571  
7.554  
7.378  
7.363  
7.350  
7.338  
7.323  
7.320  
7.312  
7.307  
7.300  
7.294  
7.260  
6.379

4.637  
4.626

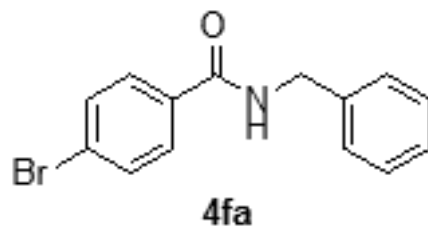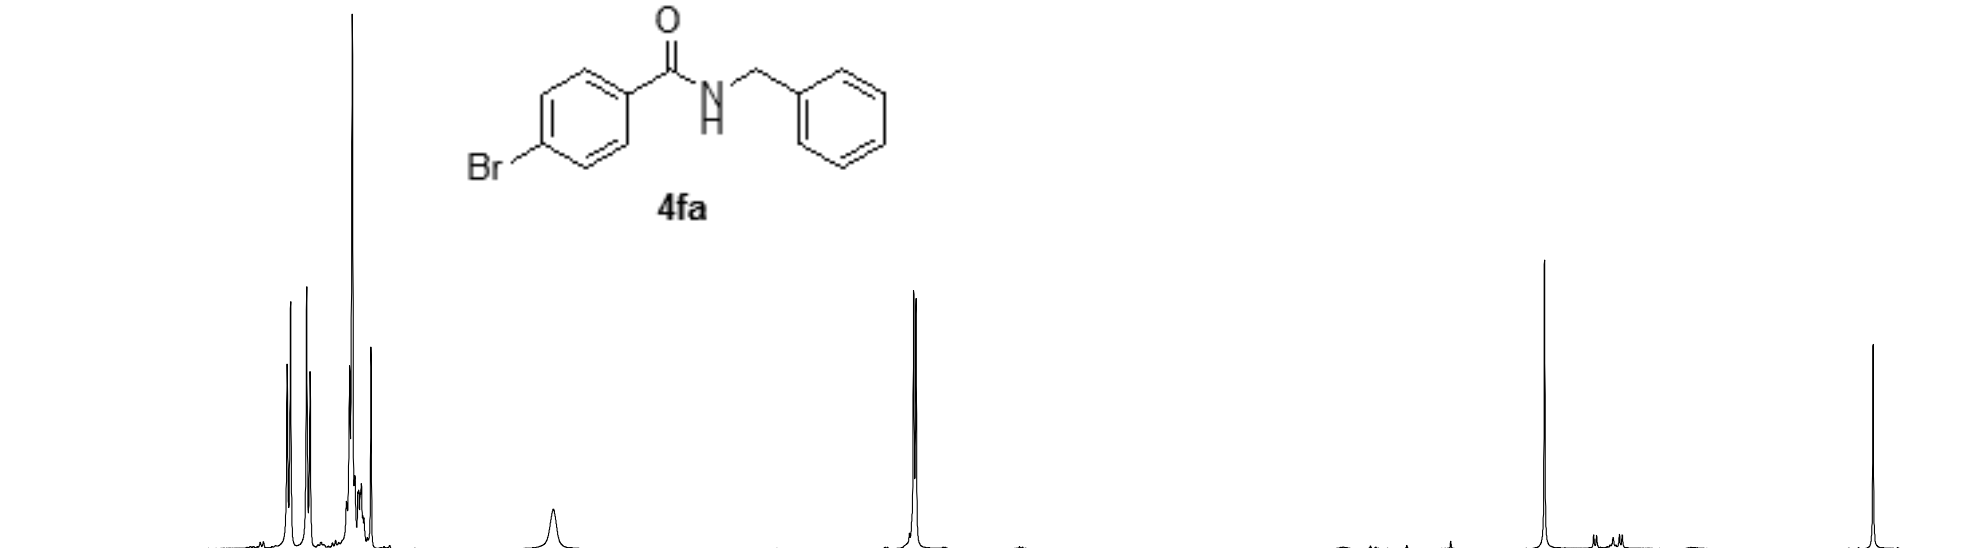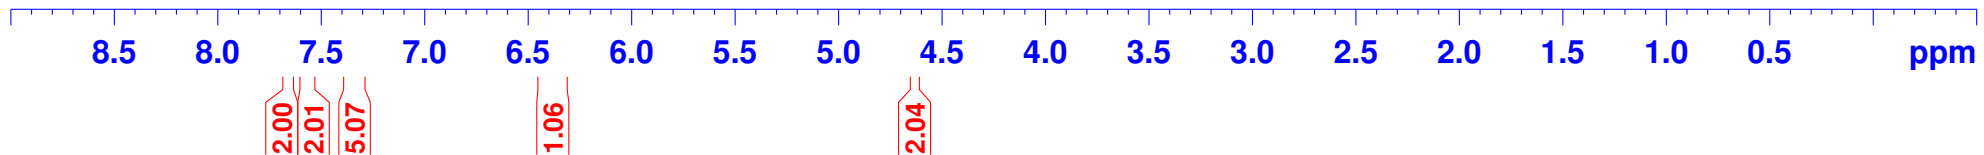

N-benzyl-4-bromobenzamide  
C13CPD CDC13

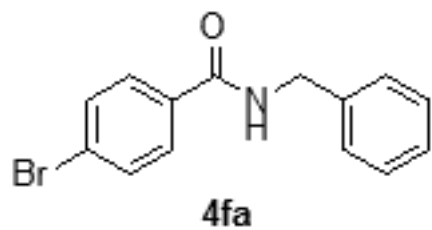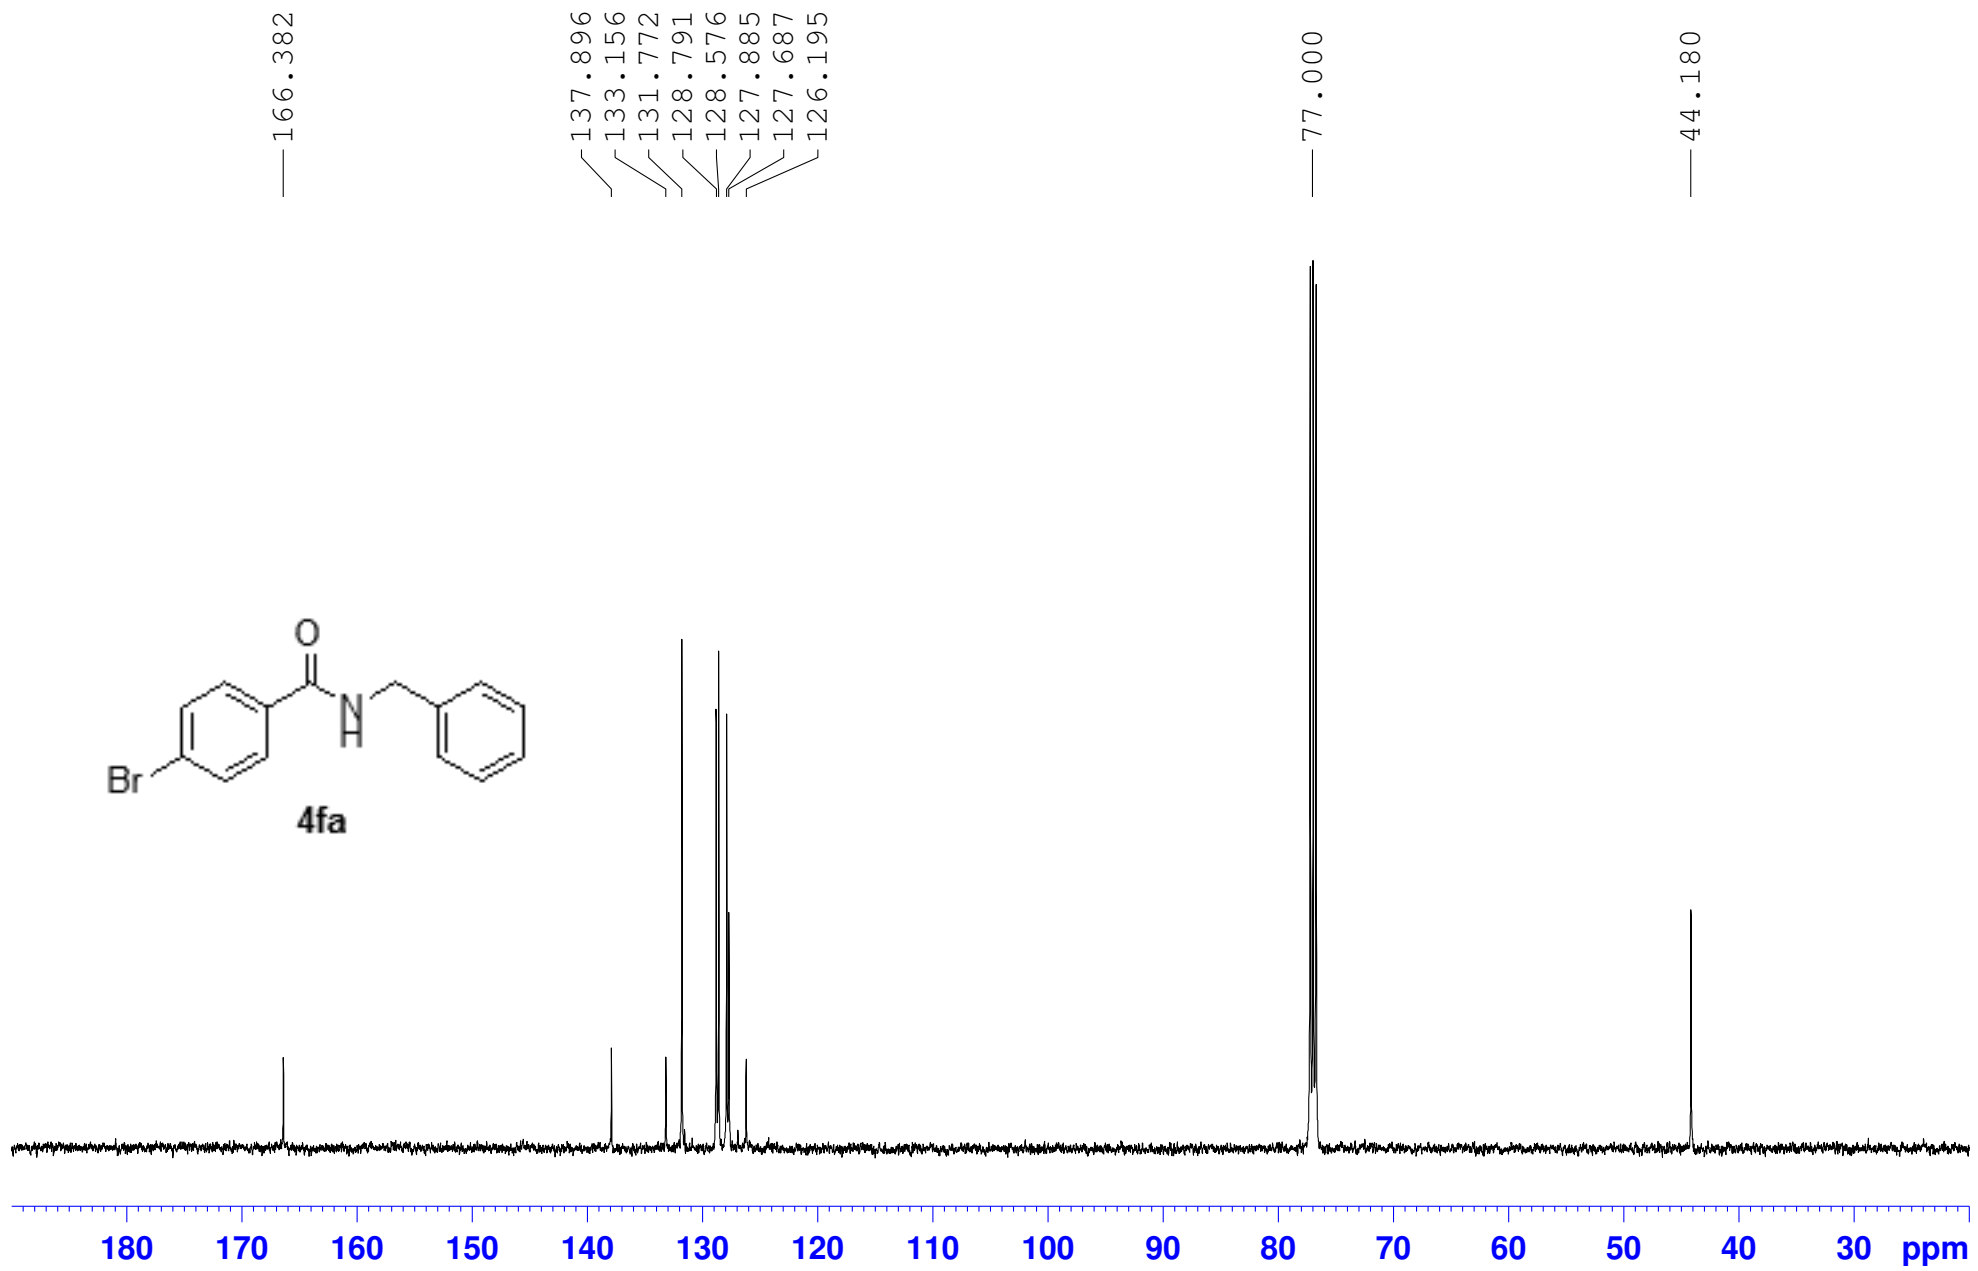

N-benzyl-4-(trifluoromethyl)benzamide  
Proton CDCl<sub>3</sub>

7.908  
7.892  
7.702  
7.686  
7.374  
7.362  
7.335  
7.332  
7.324  
7.319  
7.262  
— 6.486

4.666  
4.655

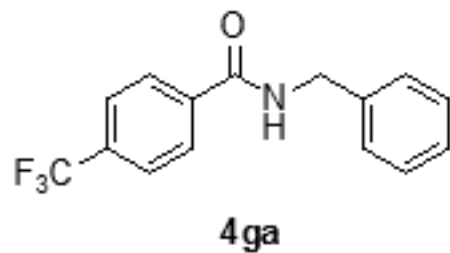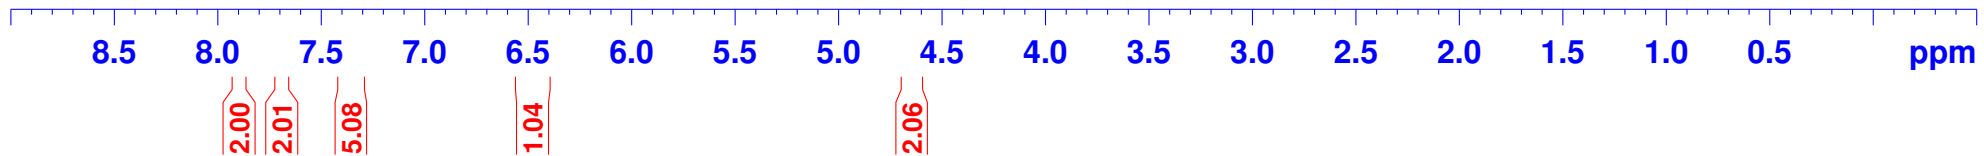



N-benzyl-4-(trifluoromethyl)benzamide  
C13CPD CDCl3

— 166.098

137.753  
137.664  
133.672  
133.413  
133.150  
132.892  
128.846  
127.895  
127.784  
127.454  
126.882  
125.601  
124.714  
122.544  
120.376

— 77.000

— 44.284

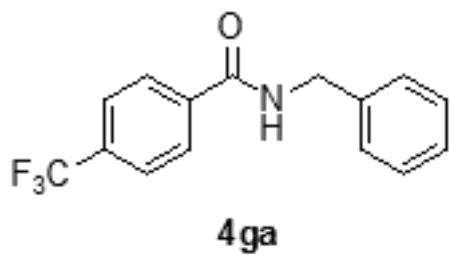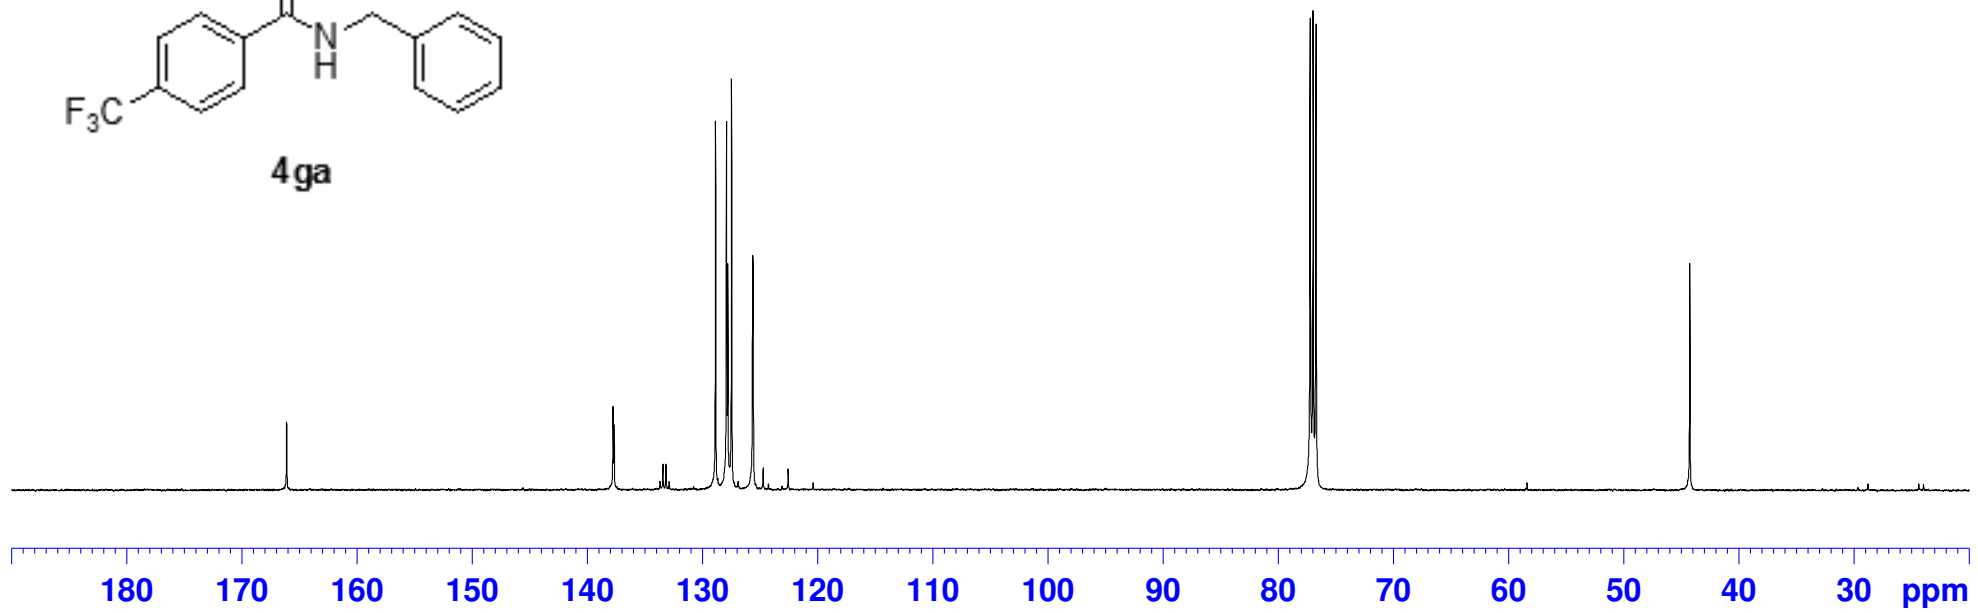

N-benzyl-4-methylbenzamide  
Proton CDCl<sub>3</sub>

7.697  
7.681  
7.356  
7.353  
7.348  
7.345  
7.300  
7.293  
7.284  
7.258  
7.229  
7.215  
6.425  
6.392

4.646  
4.639  
4.635  
4.628

— 2.389

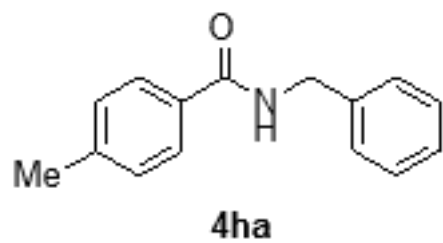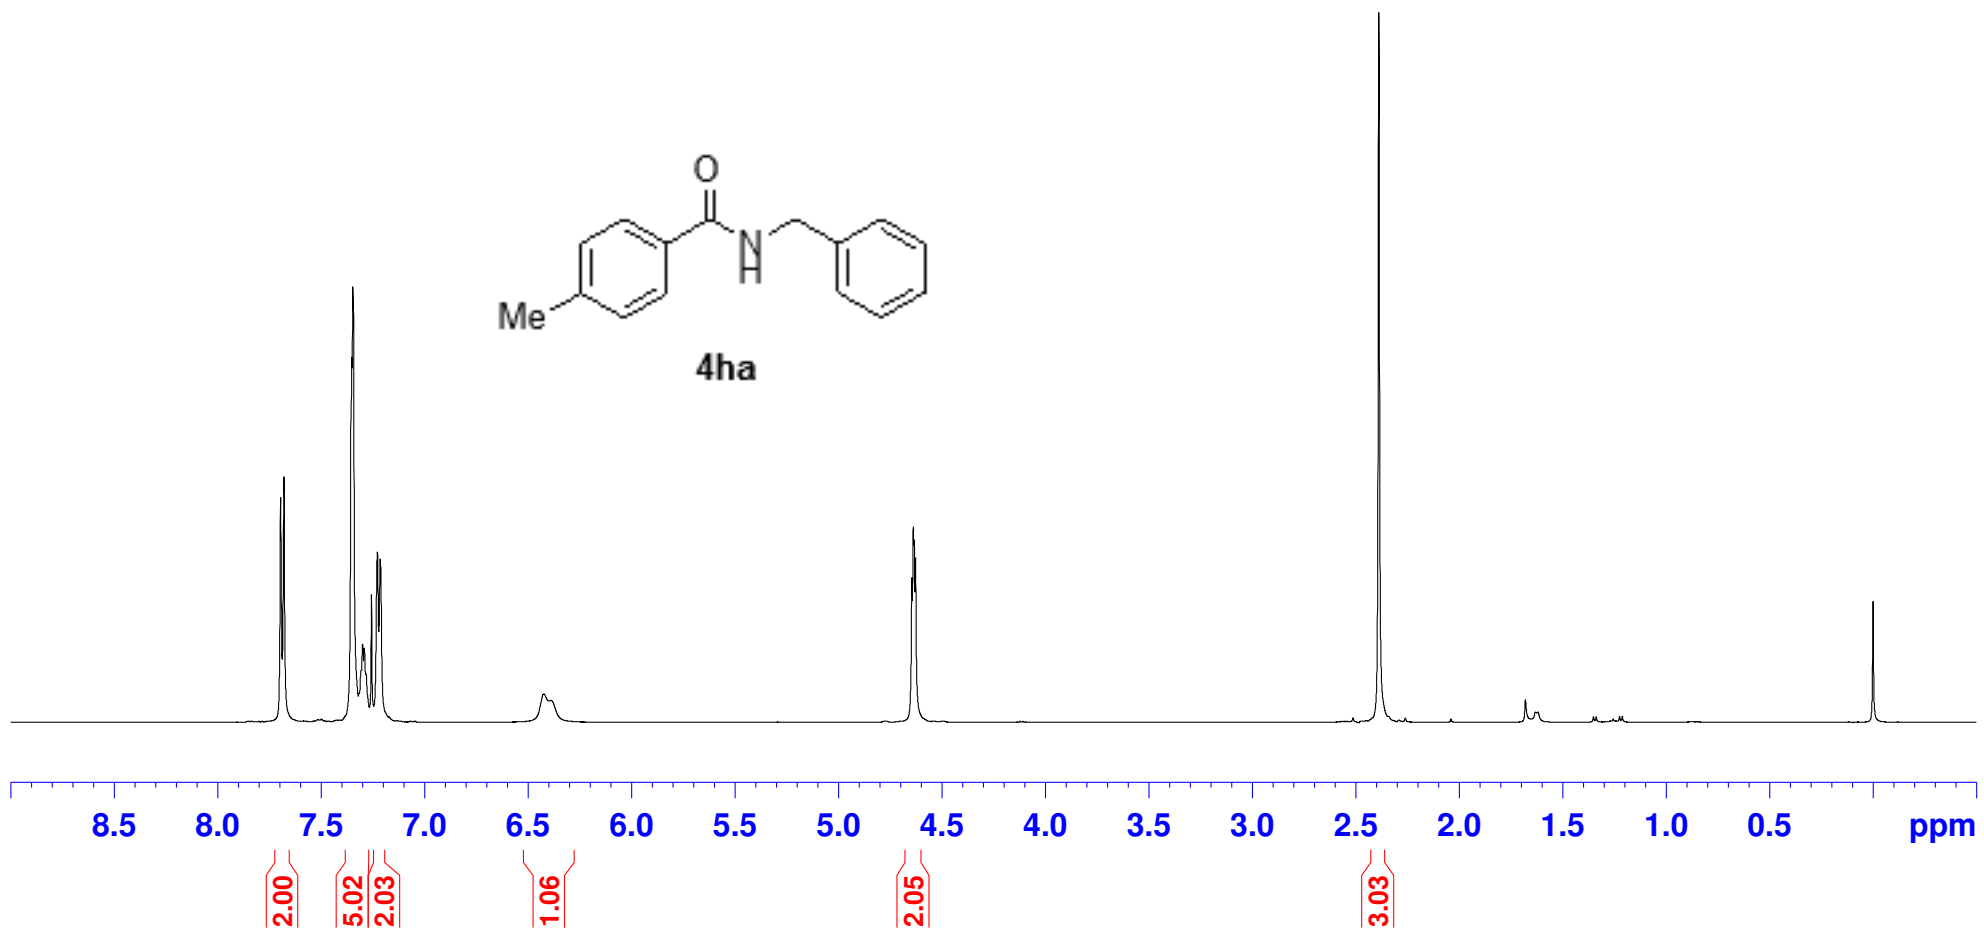

N-benzyl-4-methylbenzamide  
C13CPD CDC13

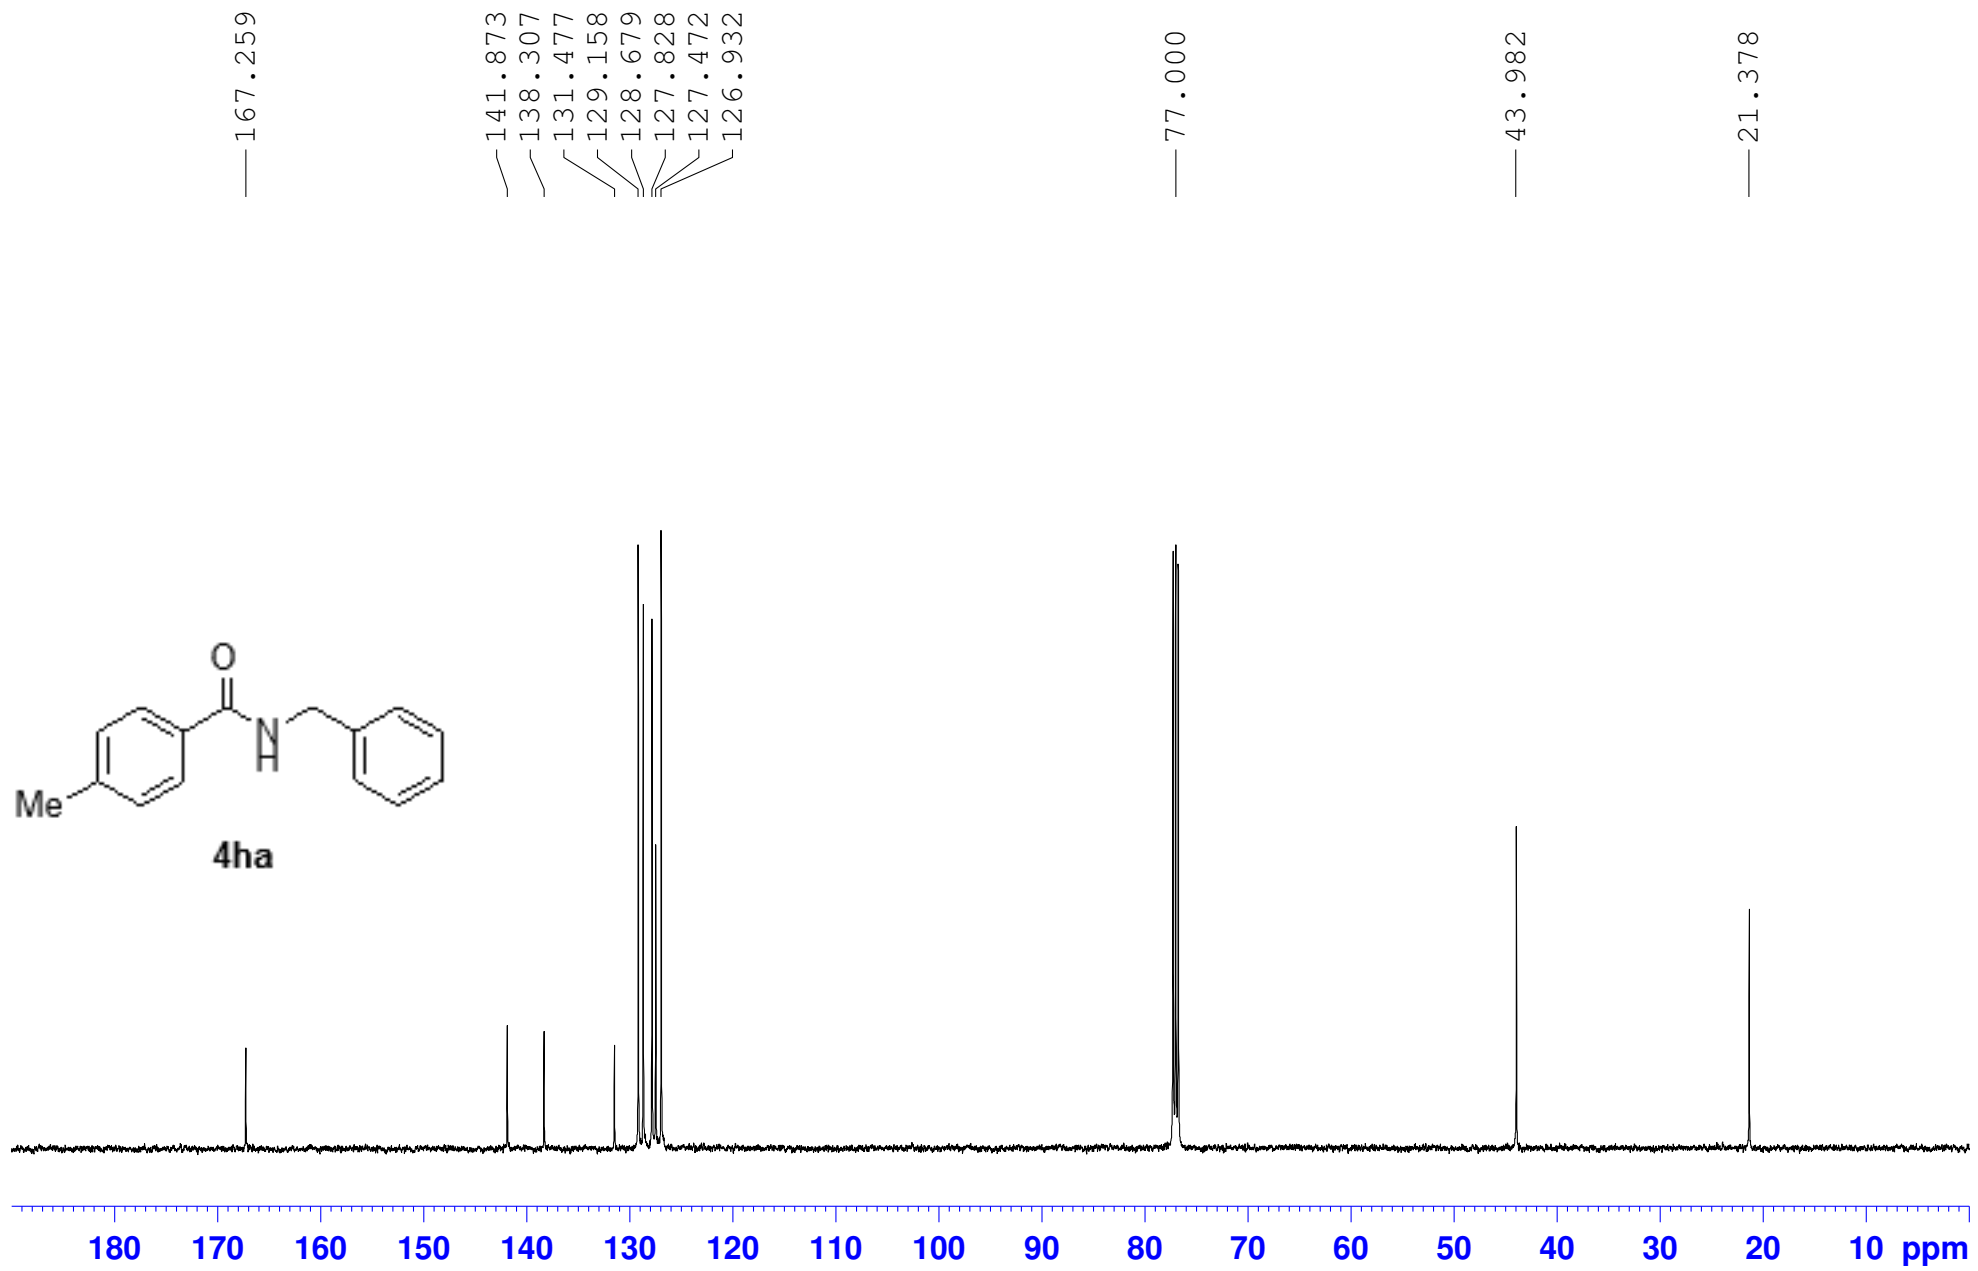

N-benzyl-4-methoxybenzamide  
Proton CDCl<sub>3</sub>

7.767  
7.750  
7.353  
7.345  
7.306  
7.298  
7.289  
7.281  
7.258  
6.920  
6.903  
6.359

4.635  
4.624

3.840

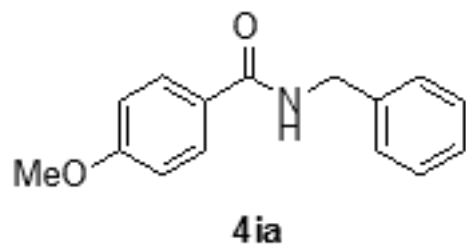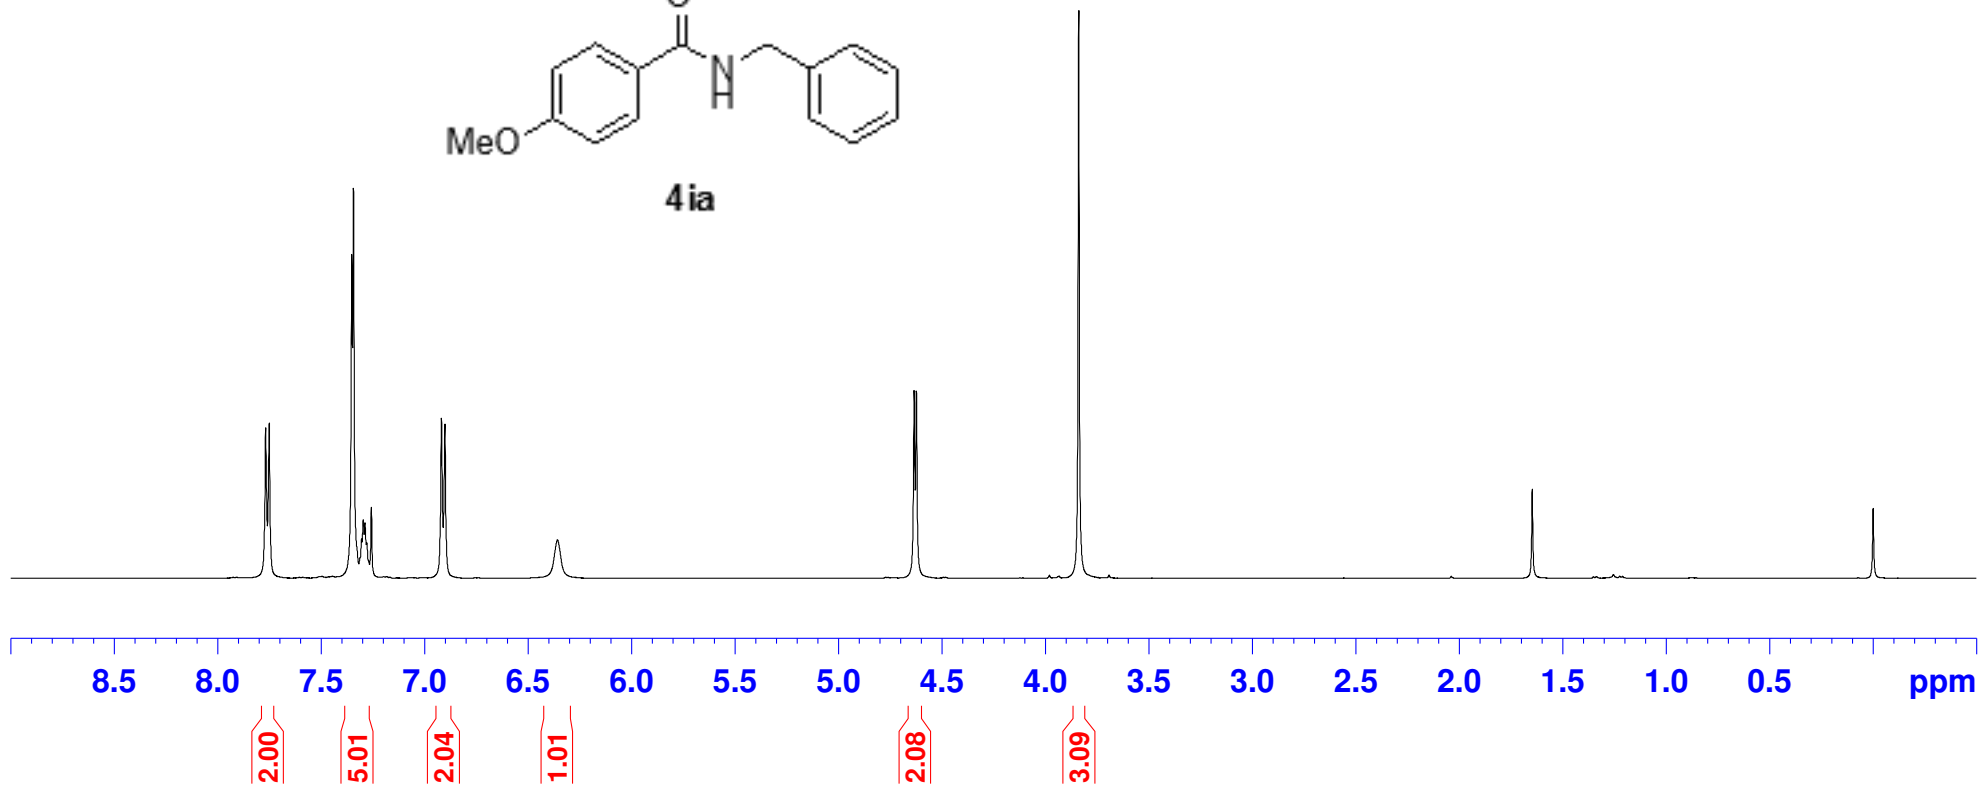

N-benzyl-4-methoxybenzamide  
C13CPD CDC13

— 166.861  
— 162.156

— 138.419  
— 128.751  
— 128.665  
— 127.809  
— 127.436  
— 126.620

— 113.691

— 77.000

— 55.331

— 43.974

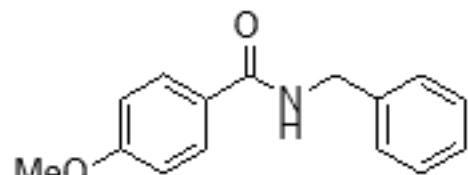

4ia

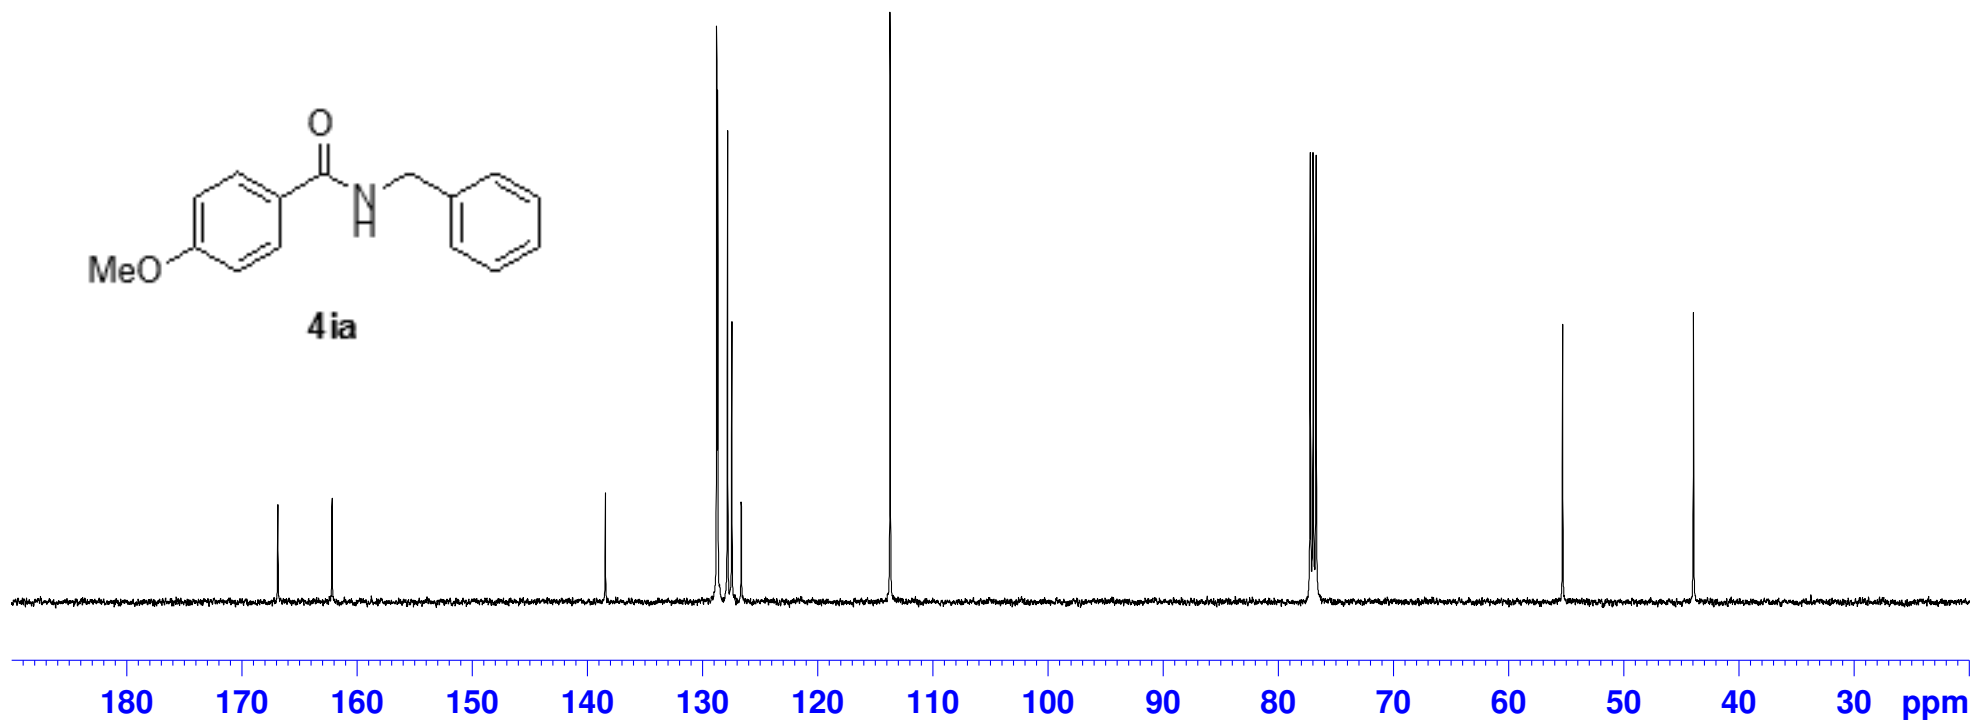

N-benzylthiophene-2-carboxamide  
Proton CDCl<sub>3</sub>

7.510  
7.502  
7.480  
7.470  
7.358  
7.349  
7.323  
7.315  
7.307  
7.298  
7.289  
7.280  
7.259  
7.075  
7.067  
7.058  
6.297

4.627  
4.615

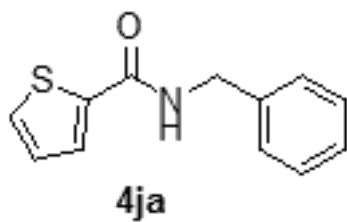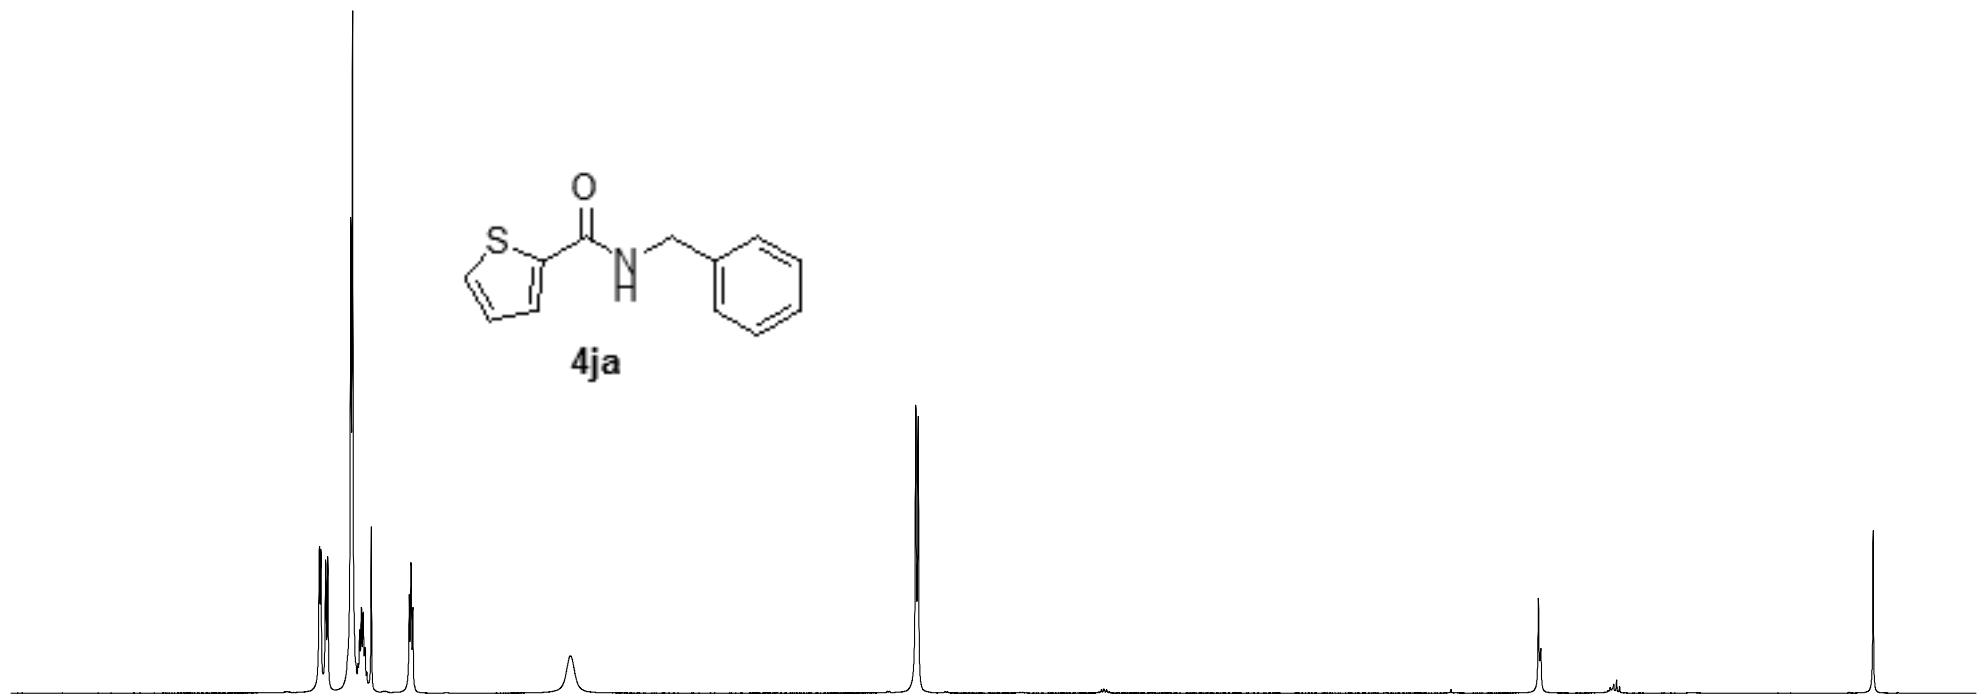

8.5 8.0 7.5 7.0 6.5 6.0 5.5 5.0 4.5 4.0 3.5 3.0 2.5 2.0 1.5 1.0 0.5 ppm

1.04  
0.99  
4.05  
1.06  
1.02  
1.03  
2.00

N-benzylthiophene-2-carboxamide  
C13CPD CDC13

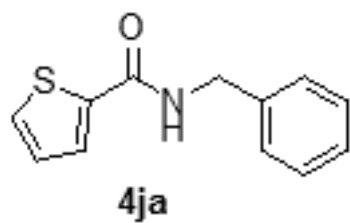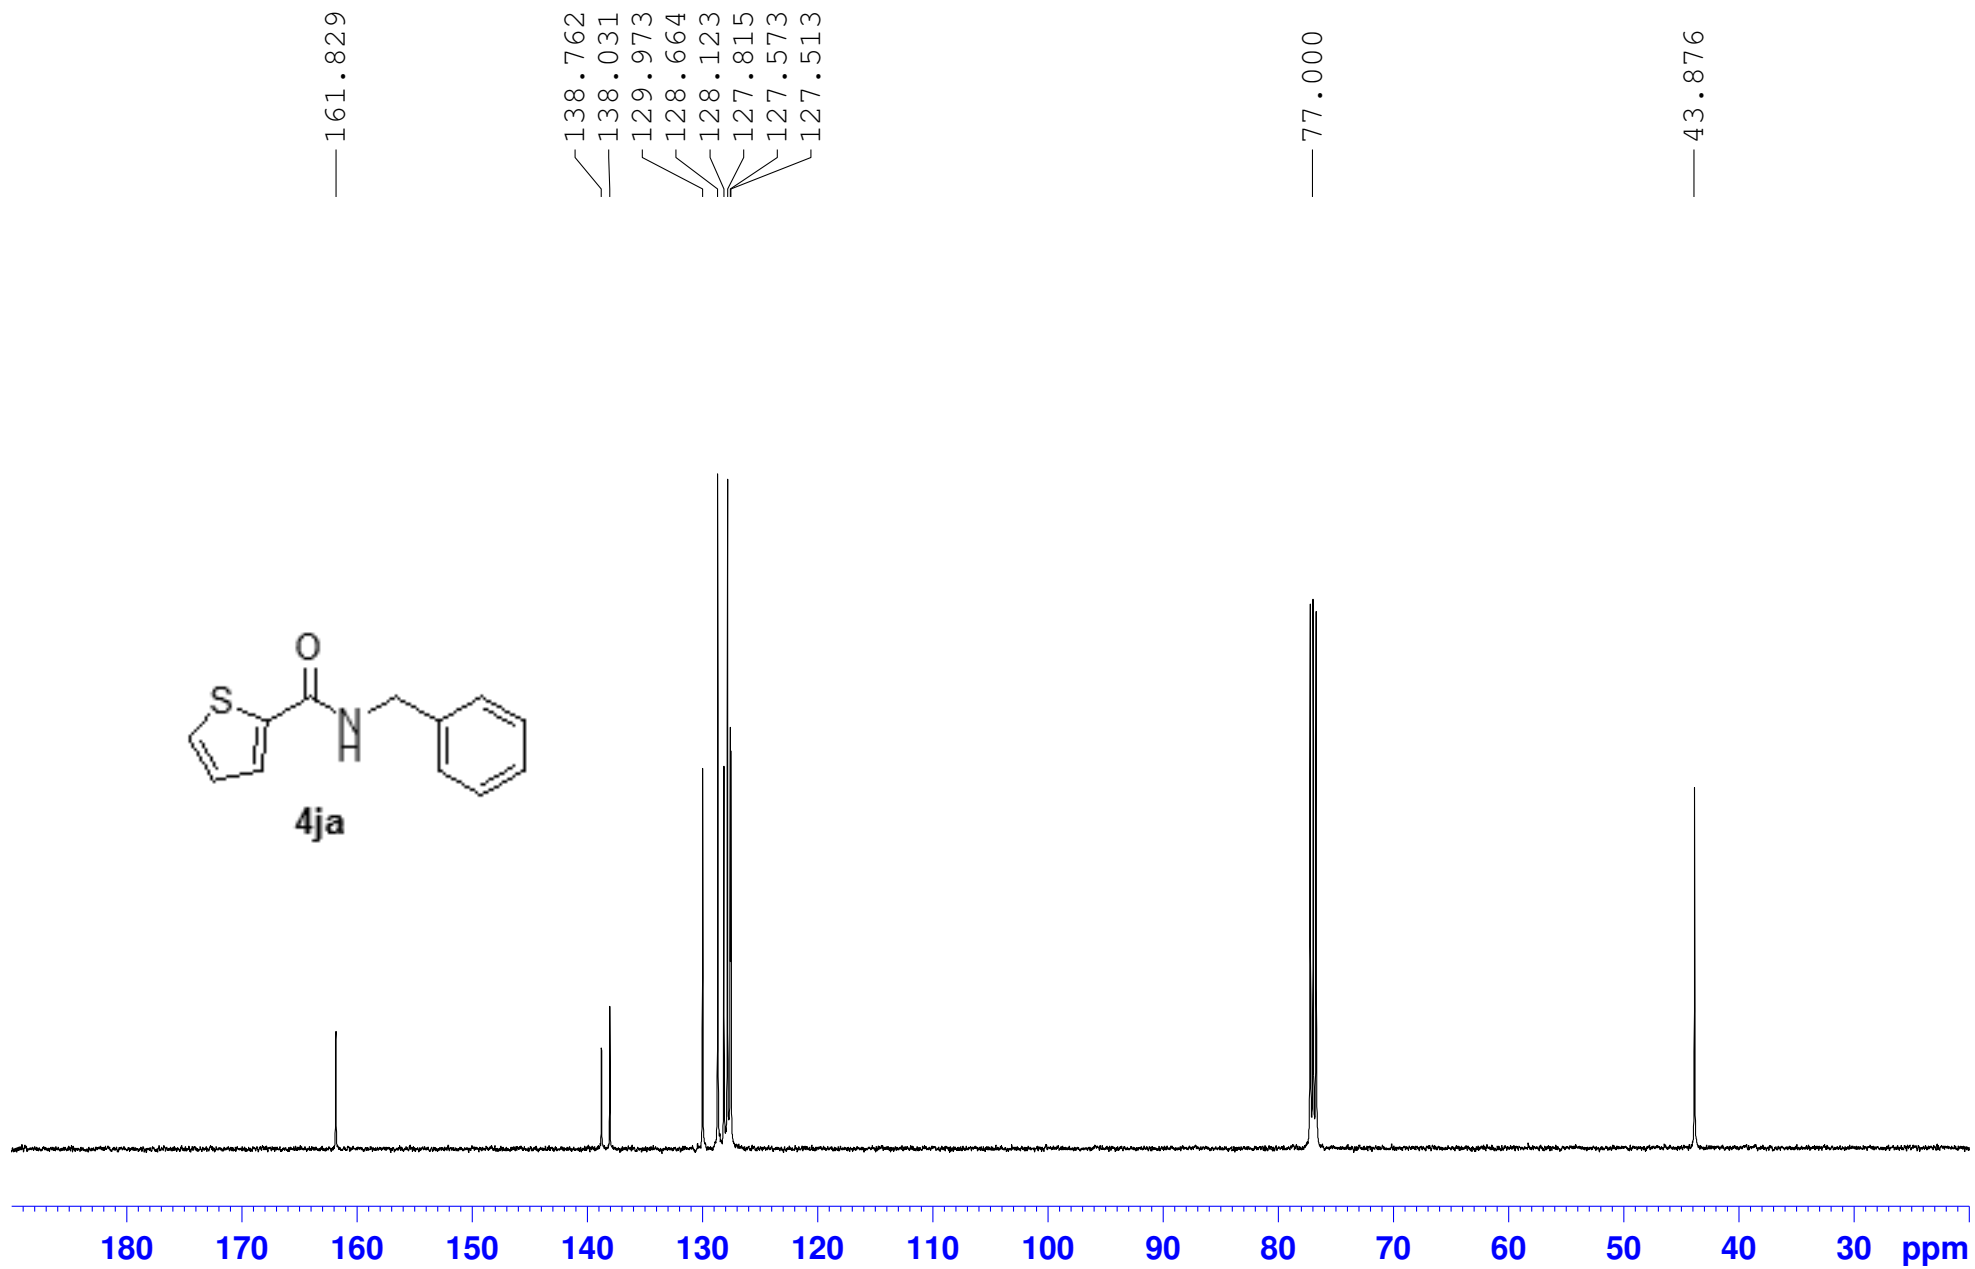

N-benzylfuran-2-carboxamide

PROTON CDC13

7.415  
7.413  
7.412  
7.356  
7.348  
7.319  
7.311  
7.302  
7.294  
7.287  
7.284  
7.277  
7.260  
7.151  
7.150  
7.144  
7.143  
6.645  
6.506  
6.502  
6.499  
6.495

4.624  
4.612

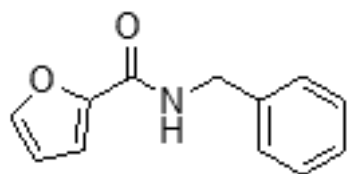

4ka

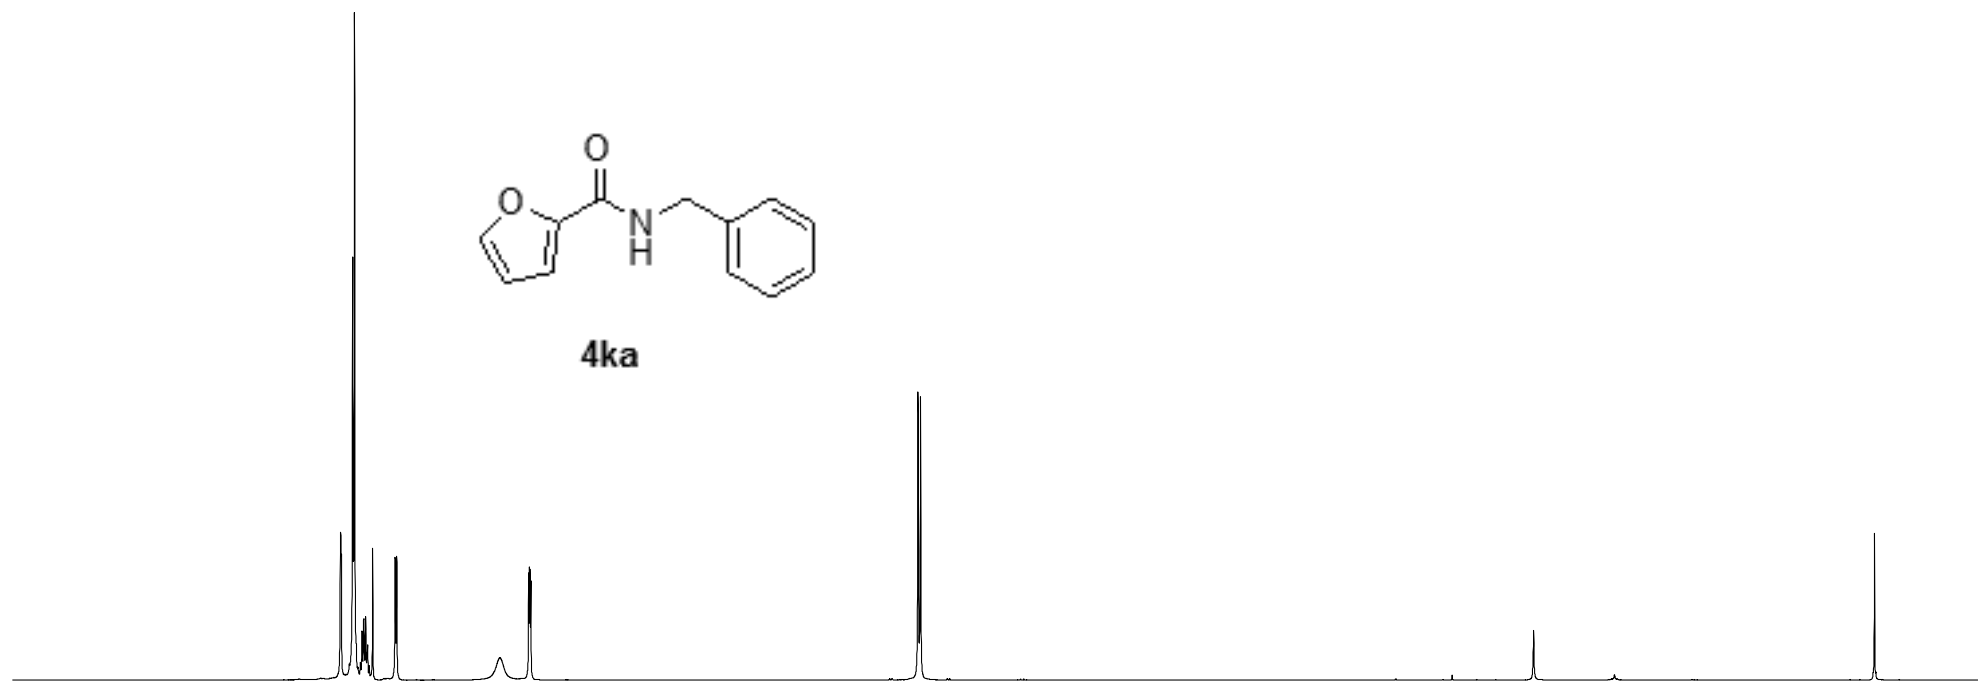

8.5 8.0 7.5 7.0 6.5 6.0 5.5 5.0 4.5 4.0 3.5 3.0 2.5 2.0 1.5 1.0 0.5 ppm

1.00  
4.00  
0.99  
1.00  
1.00  
1.00  
2.00



N-benzylfuran-2-carboxamide  
C13CPD CDC13

— 158.218  
— 147.919  
— 143.835  
— 138.008  
— 128.728  
— 127.873  
— 127.591  
— 114.341  
— 112.130  
— 76.998  
— 43.141

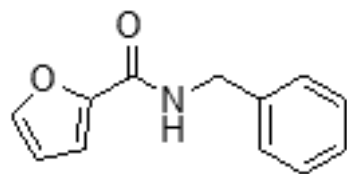

4ka

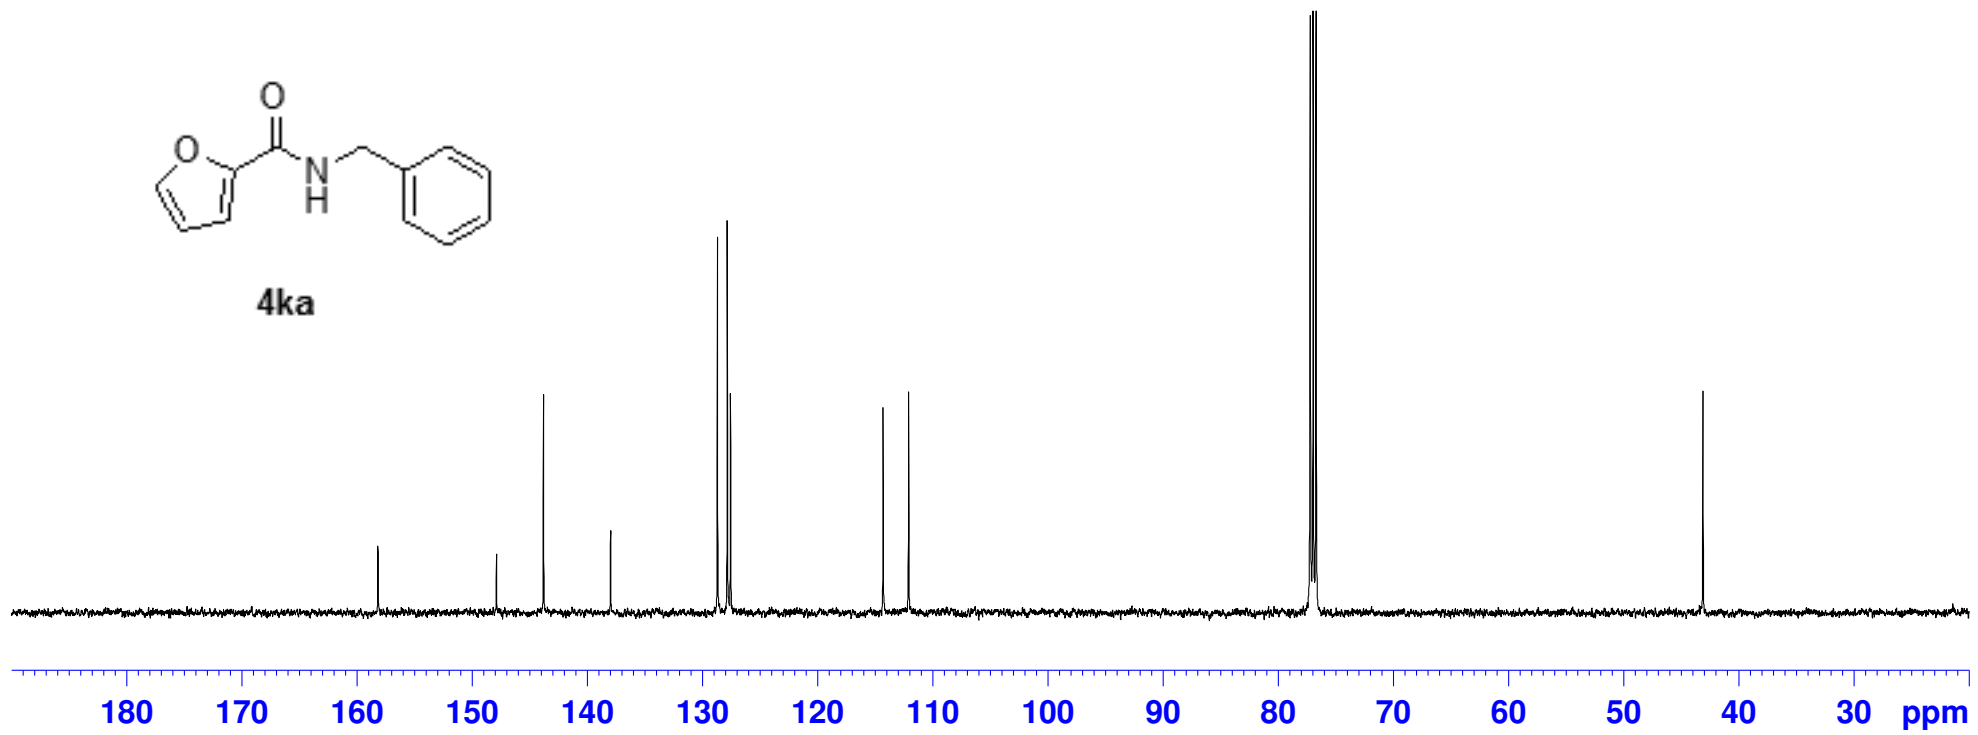

N-benzyl-2-phenylpropanamide  
Proton CDCl<sub>3</sub>

7.350  
7.336  
7.321  
7.309  
7.293  
7.273  
7.258  
7.244  
7.229  
7.144  
7.130

— 5.648

4.431  
4.420  
4.401  
4.388  
4.372  
4.354  
4.342  
3.615  
3.602  
3.588  
3.574

1.562  
1.548

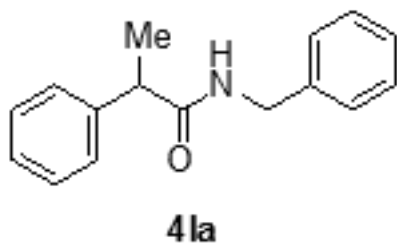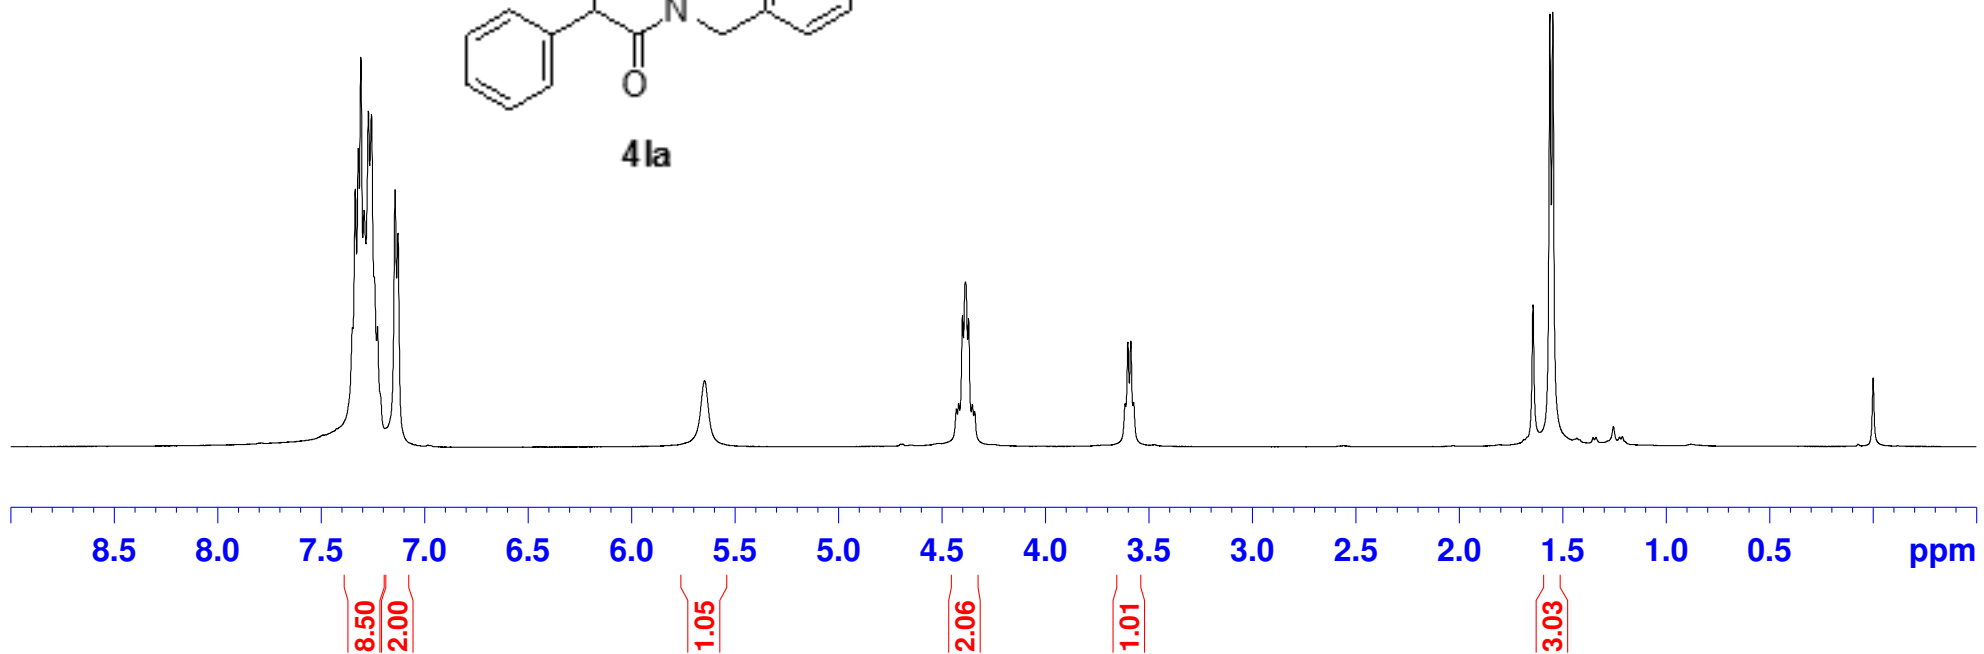

N-benzyl-2-phenylpropanamide  
C13CPD CDCl3

— 173.999

— 141.284  
— 138.304  
— 128.871  
— 128.548  
— 127.606  
— 127.390  
— 127.278  
— 127.238

— 77.000

— 47.100  
— 43.502

— 18.487

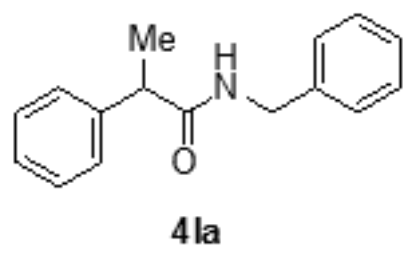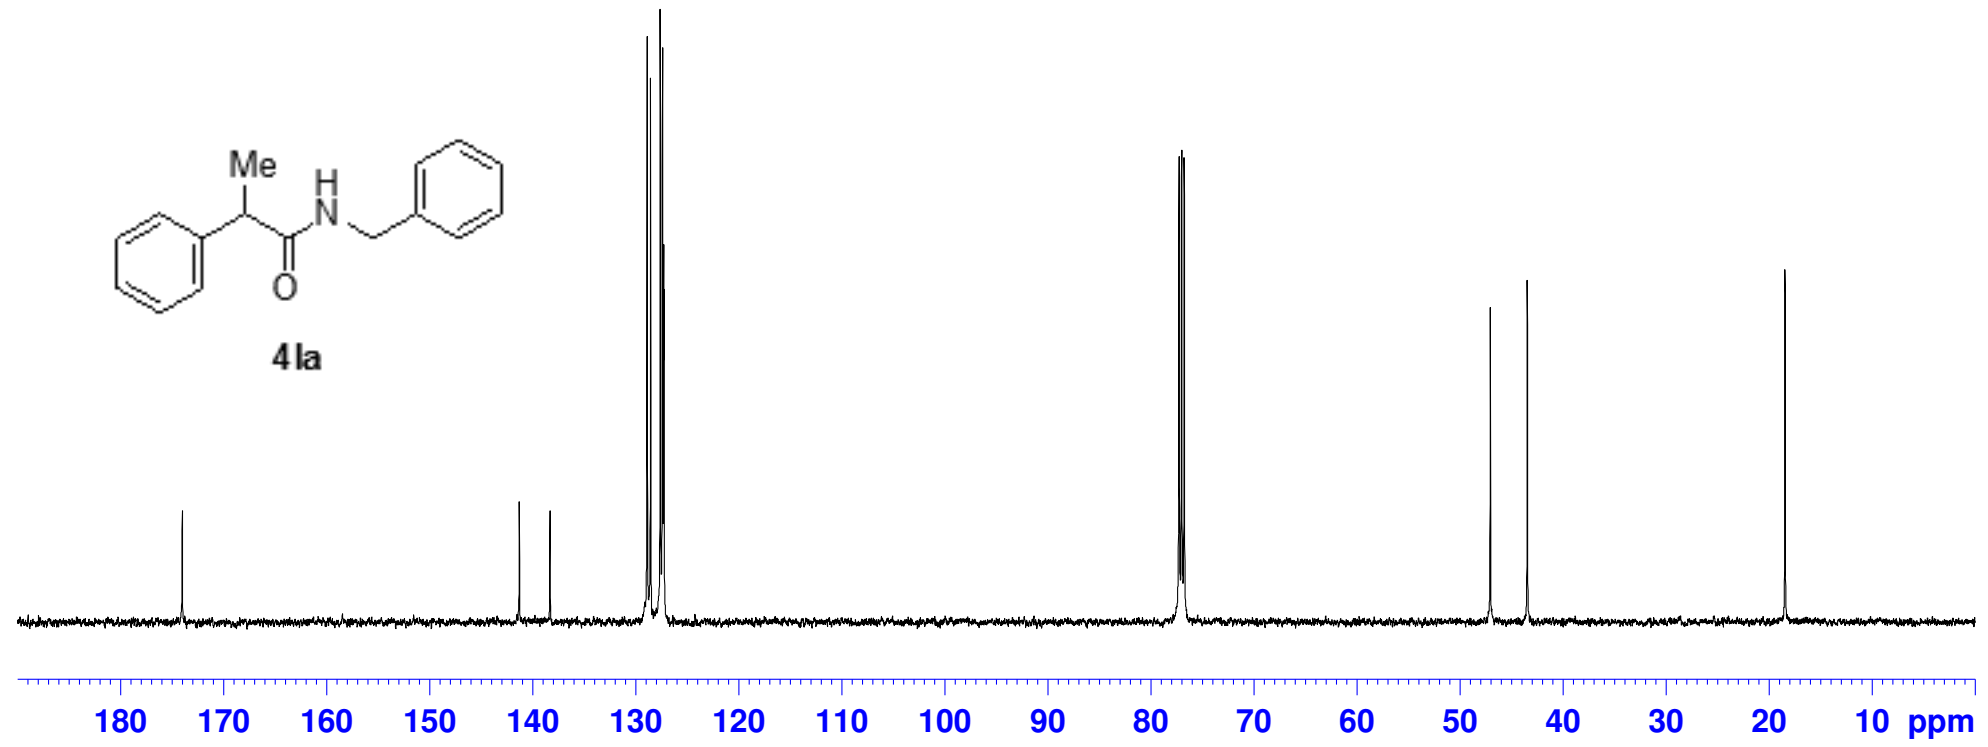

N-benzylbutyramide  
Proton CDCl<sub>3</sub>

7.350  
7.335  
7.321  
7.286  
7.262

— 5.736

4.451  
4.442

2.209  
2.194  
2.180  
1.732  
1.718  
1.703  
1.688  
1.675  
1.660  
0.975  
0.961  
0.946

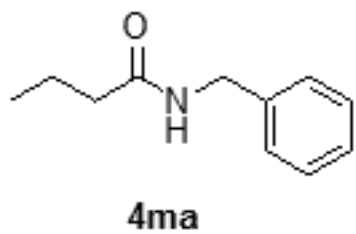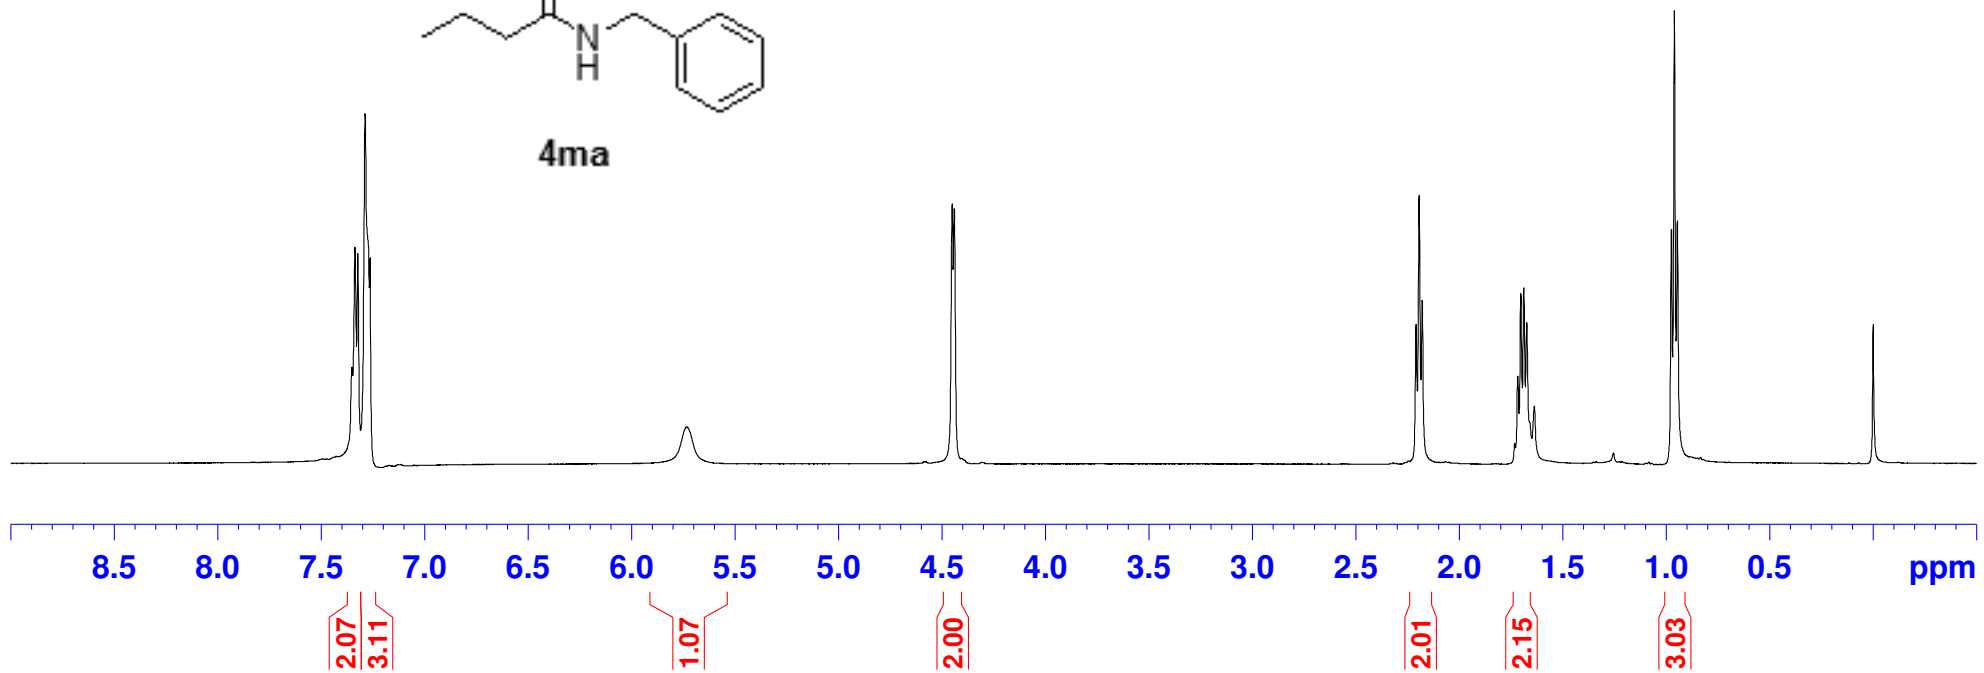

N-benzylbutyramide  
C13CPD CDCl3

—172.791

—138.439

128.632

127.742

127.404

—77.000

—43.493

—38.616

—19.126

—13.737

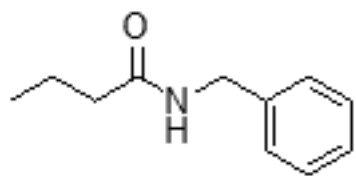

4ma

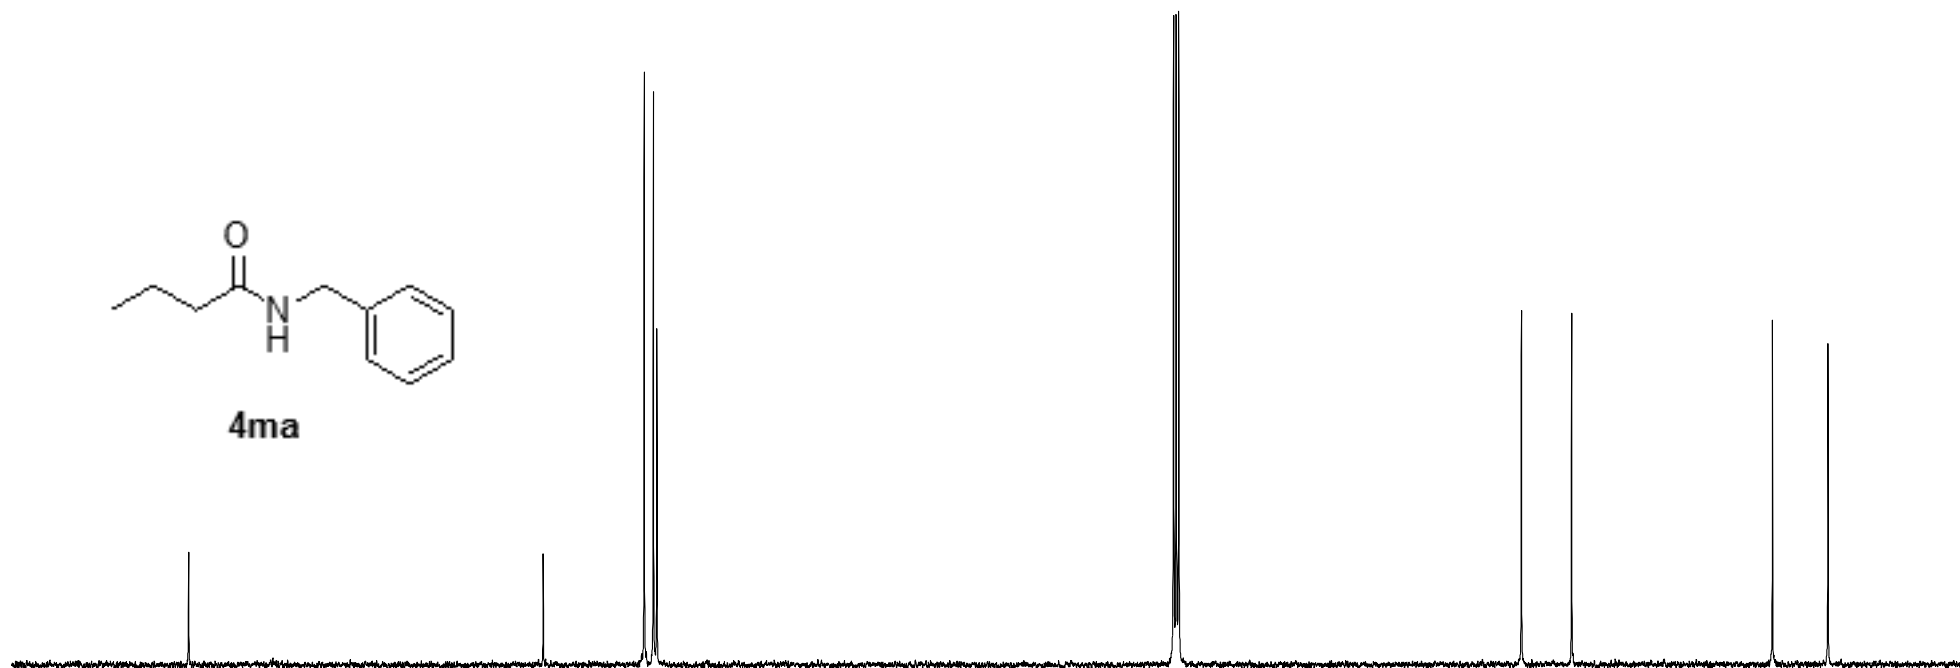

180 170 160 150 140 130 120 110 100 90 80 70 60 50 40 30 20 10 ppm
